# Supplementary material for: African-specific alleles modify risk for asthma at the 17q12-q21 locus in African Americans
Source: Genome Med. 2022 Sep 29;14:112. doi: 10.1186/s13073-022-01114-x (PMC9520885; doi:10.1186/s13073-022-01114-x)
Supplement: Supplementary file 2 — Additional file 2. Region-wide eQTL results in airway epithelial cells from 189 African American children in the URECA cohort. [file 13073_2022_1114_MOESM2_ESM.xlsx]

## Sheet: URECA_AAonly_finalRegionWide_Re
rsID	pos(hg38)	Gene	Statistic	P-Value	FDR	Beta	Beta_SE	Lower_CI	Upper_CI
rs2305480	chr17:39905943	CASC3	0.501477	0.616704	0.998469	0.0297897	0.0594039	-0.086642	0.146221
rs2305480	chr17:39905943	CDC6	0.0626822	0.950095	0.998469	0.0174813	0.278887	-0.529138	0.5641
rs2305480	chr17:39905943	CDK12	-0.229053	0.819111	0.998469	-0.0166653	0.0727575	-0.15927	0.125939
rs2305480	chr17:39905943	CSF3	0.475161	0.635301	0.998469	0.169411	0.356533	-0.529394	0.868215
rs2305480	chr17:39905943	ERBB2	0.66716	0.505602	0.998469	0.0407331	0.0610544	-0.0789336	0.1604
rs2305480	chr17:39905943	GJD3	1.21983	0.224269	0.987976	0.189069	0.154996	-0.114723	0.49286
rs2305480	chr17:39905943	GRB7	-0.122984	0.902269	0.998469	-0.0131388	0.106833	-0.222531	0.196254
rs2305480	chr17:39905943	GSDMA	1.18997	0.235767	0.987976	0.354865	0.298213	-0.229632	0.939362
rs2305480	chr17:39905943	GSDMB	6.1839	4.74531e-09	2.0894e-06	0.530961	0.0858619	0.362672	0.699251
rs2305480	chr17:39905943	IKZF3	0.814336	0.416626	0.998469	0.161063	0.197784	-0.226594	0.54872
rs2305480	chr17:39905943	MED1	-0.538015	0.591292	0.998469	-0.0441926	0.0821401	-0.205187	0.116802
rs2305480	chr17:39905943	MED24	-0.116046	0.907757	0.998469	-0.00518556	0.0446854	-0.0927689	0.0823978
rs2305480	chr17:39905943	MIEN1	1.0684	0.2869	0.991261	0.0424816	0.0397618	-0.0354516	0.120415
rs2305480	chr17:39905943	MSL1	2.31161	0.0220359	0.401731	0.213019	0.092152	0.0324011	0.393637
rs2305480	chr17:39905943	NEUROD2	0.630295	0.529373	0.998469	0.125307	0.198807	-0.264355	0.51497
rs2305480	chr17:39905943	NR1D1	0.502105	0.616263	0.998469	0.0799619	0.159253	-0.232175	0.392099
rs2305480	chr17:39905943	ORMDL3	-0.463431	0.643666	0.998469	-0.0222745	0.0480643	-0.11648	0.0719315
rs2305480	chr17:39905943	PGAP3	3.13149	0.00205787	0.0955141	0.190223	0.0607452	0.0711623	0.309284
rs2305480	chr17:39905943	PPP1R1B	-0.0380692	0.969679	0.998469	-0.0112456	0.2954	-0.59023	0.567738
rs2305480	chr17:39905943	PSMD3	0.00803502	0.993599	0.998469	0.000332341	0.0413616	-0.0807364	0.0814011
rs2305480	chr17:39905943	RAPGEFL1	0.682238	0.496045	0.998469	0.0684233	0.100292	-0.12815	0.264996
rs2305480	chr17:39905943	RARA	2.08704	0.0384213	0.565191	0.255847	0.122588	0.0155741	0.49612
rs2305480	chr17:39905943	STARD3	0.366416	0.714524	0.998469	0.0197432	0.0538818	-0.0858651	0.125351
rs2305480	chr17:39905943	TCAP	1.42366	0.156432	0.942192	0.244106	0.171463	-0.091962	0.580174
rs2305480	chr17:39905943	THRA	-1.63054	0.104895	0.850727	-0.15333	0.0940365	-0.337642	0.0309813
rs2305480	chr17:39905943	TOP2A	-0.336755	0.736729	0.998469	-0.0620262	0.184188	-0.423034	0.298982
rs2305480	chr17:39905943	WIPF2	0.0516942	0.958835	0.998469	0.00287223	0.0555619	-0.106029	0.111774
rs2305479	chr17:39905964	CASC3	0.0258241	0.979429	0.998469	0.00134418	0.0520514	-0.100677	0.103365
rs2305479	chr17:39905964	CDC6	0.339619	0.734575	0.998469	0.0829014	0.244101	-0.395536	0.561339
rs2305479	chr17:39905964	CDK12	-0.0495948	0.960505	0.998469	-0.00315985	0.0637134	-0.128038	0.121718
rs2305479	chr17:39905964	CSF3	0.265257	0.791143	0.998469	0.0828435	0.312314	-0.529292	0.694979
rs2305479	chr17:39905964	ERBB2	-0.590597	0.555599	0.998469	-0.0315807	0.0534726	-0.136387	0.0732255
rs2305479	chr17:39905964	GJD3	-0.904179	0.367219	0.998469	-0.122953	0.135983	-0.389478	0.143573
rs2305479	chr17:39905964	GRB7	-0.399144	0.690303	0.998469	-0.0373192	0.0934982	-0.220576	0.145937
rs2305479	chr17:39905964	GSDMA	-0.70095	0.484322	0.998469	-0.183531	0.261832	-0.696723	0.32966
rs2305479	chr17:39905964	GSDMB	-4.37889	2.11198e-05	0.0025027	-0.345814	0.0789729	-0.5006	-0.191027
rs2305479	chr17:39905964	IKZF3	-0.356786	0.721708	0.998469	-0.0618856	0.173453	-0.401854	0.278083
rs2305479	chr17:39905964	MED1	0.587288	0.557813	0.998469	0.04223	0.0719067	-0.0987072	0.183167
rs2305479	chr17:39905964	MED24	1.12936	0.260384	0.987976	0.0440181	0.0389761	-0.032375	0.120411
rs2305479	chr17:39905964	MIEN1	-1.46011	0.146161	0.922393	-0.0506814	0.0347107	-0.118714	0.0173515
rs2305479	chr17:39905964	MSL1	-2.50572	0.0131893	0.330975	-0.201621	0.0804643	-0.359331	-0.043911
rs2305479	chr17:39905964	NEUROD2	-0.0616994	0.950877	0.998469	-0.0107527	0.174276	-0.352333	0.330828
rs2305479	chr17:39905964	NR1D1	-0.412241	0.680698	0.998469	-0.0574956	0.139471	-0.330859	0.215868
rs2305479	chr17:39905964	ORMDL3	0.536368	0.592427	0.998469	0.0225671	0.042074	-0.0598979	0.105032
rs2305479	chr17:39905964	PGAP3	-2.55098	0.011651	0.322749	-0.136976	0.0536953	-0.242219	-0.031733
rs2305479	chr17:39905964	PPP1R1B	0.272442	0.785622	0.998469	0.0704493	0.258584	-0.436376	0.577274
rs2305479	chr17:39905964	PSMD3	0.032774	0.973894	0.998469	0.00118689	0.0362146	-0.0697936	0.0721674
rs2305479	chr17:39905964	RAPGEFL1	-0.108335	0.913862	0.998469	-0.0095262	0.0879329	-0.181875	0.162822
rs2305479	chr17:39905964	RARA	-2.83024	0.00522952	0.190077	-0.300554	0.106194	-0.508695	-0.0924141
rs2305479	chr17:39905964	STARD3	-0.637531	0.524663	0.998469	-0.0300519	0.047138	-0.122443	0.0623386
rs2305479	chr17:39905964	TCAP	-1.07737	0.282887	0.991261	-0.162163	0.150518	-0.457178	0.132851
rs2305479	chr17:39905964	THRA	1.25862	0.209945	0.987976	0.103962	0.0825999	-0.0579339	0.265858
rs2305479	chr17:39905964	TOP2A	1.13709	0.257151	0.987976	0.182724	0.160695	-0.132238	0.497687
rs2305479	chr17:39905964	WIPF2	-0.11792	0.906275	0.998469	-0.00573637	0.0486463	-0.101083	0.0896104
rs56750287	chr17:39906691	CASC3	0.0522422	0.958399	0.998469	0.00271187	0.0519097	-0.099031	0.104455
rs56750287	chr17:39906691	CDC6	-0.0208526	0.983388	0.998469	-0.00507807	0.243523	-0.482382	0.472226
rs56750287	chr17:39906691	CDK12	-0.233573	0.815606	0.998469	-0.014839	0.0635303	-0.139358	0.10968
rs56750287	chr17:39906691	CSF3	0.10275	0.918286	0.998469	0.0320089	0.311522	-0.578574	0.642592
rs56750287	chr17:39906691	ERBB2	-0.473614	0.636401	0.998469	-0.0252661	0.0533474	-0.129827	0.0792948
rs56750287	chr17:39906691	GJD3	-0.58448	0.559696	0.998469	-0.0793771	0.135808	-0.345561	0.186807
rs56750287	chr17:39906691	GRB7	-0.410283	0.682131	0.998469	-0.0382554	0.0932416	-0.221009	0.144498
rs56750287	chr17:39906691	GSDMA	-0.632946	0.527645	0.998469	-0.165321	0.261193	-0.677259	0.346617
rs56750287	chr17:39906691	GSDMB	-4.50775	1.237e-05	0.00188466	-0.353925	0.0785147	-0.507814	-0.200036
rs56750287	chr17:39906691	IKZF3	-0.399103	0.690333	0.998469	-0.069031	0.172965	-0.408043	0.269981
rs56750287	chr17:39906691	MED1	0.628536	0.530522	0.998469	0.0450664	0.0717005	-0.0954667	0.185599
rs56750287	chr17:39906691	MED24	0.789549	0.430924	0.998469	0.0307503	0.0389467	-0.0455851	0.107086
rs56750287	chr17:39906691	MIEN1	-1.49949	0.135656	0.916586	-0.051889	0.0346043	-0.119713	0.0159355
rs56750287	chr17:39906691	MSL1	-2.18545	0.0302651	0.478189	-0.176147	0.0806	-0.334123	-0.0181715
rs56750287	chr17:39906691	NEUROD2	0.0521117	0.958503	0.998469	0.00905716	0.173803	-0.331597	0.349711
rs56750287	chr17:39906691	NR1D1	-0.608131	0.543937	0.998469	-0.0845351	0.139008	-0.356991	0.187921
rs56750287	chr17:39906691	ORMDL3	0.428979	0.668498	0.998469	0.0180055	0.0419729	-0.0642614	0.100272
rs56750287	chr17:39906691	PGAP3	-2.25326	0.0255602	0.443251	-0.121167	0.0537742	-0.226564	-0.0157696
rs56750287	chr17:39906691	PPP1R1B	0.345278	0.730325	0.998469	0.0890288	0.257847	-0.416351	0.594408
rs56750287	chr17:39906691	PSMD3	-0.16857	0.866341	0.998469	-0.0060876	0.0361132	-0.0768695	0.0646942
rs56750287	chr17:39906691	RAPGEFL1	-0.155678	0.876477	0.998469	-0.0136515	0.0876907	-0.185525	0.158222
rs56750287	chr17:39906691	RARA	-2.44248	0.0156417	0.352013	-0.260214	0.106537	-0.469027	-0.0514018
rs56750287	chr17:39906691	STARD3	-0.623811	0.533613	0.998469	-0.0293269	0.0470124	-0.121471	0.0628175
rs56750287	chr17:39906691	TCAP	-1.23362	0.219099	0.987976	-0.184976	0.149946	-0.47887	0.108918
rs56750287	chr17:39906691	THRA	1.7579	0.0806181	0.781629	0.144158	0.0820057	-0.016573	0.304889
rs56750287	chr17:39906691	TOP2A	1.09026	0.277189	0.991261	0.174778	0.160309	-0.139427	0.488983
rs56750287	chr17:39906691	WIPF2	-0.144378	0.885379	0.998469	-0.00700421	0.0485131	-0.10209	0.0880816
rs11078926	chr17:39906723	CASC3	-0.501477	0.616704	0.998469	-0.0297897	0.0594039	-0.146221	0.086642
rs11078926	chr17:39906723	CDC6	-0.0626822	0.950095	0.998469	-0.0174813	0.278887	-0.5641	0.529138
rs11078926	chr17:39906723	CDK12	0.229053	0.819111	0.998469	0.0166653	0.0727575	-0.125939	0.15927
rs11078926	chr17:39906723	CSF3	-0.475161	0.635301	0.998469	-0.169411	0.356533	-0.868215	0.529394
rs11078926	chr17:39906723	ERBB2	-0.66716	0.505602	0.998469	-0.0407331	0.0610544	-0.1604	0.0789336
rs11078926	chr17:39906723	GJD3	-1.21983	0.224269	0.987976	-0.189069	0.154996	-0.49286	0.114723
rs11078926	chr17:39906723	GRB7	0.122984	0.902269	0.998469	0.0131388	0.106833	-0.196254	0.222531
rs11078926	chr17:39906723	GSDMA	-1.18997	0.235767	0.987976	-0.354865	0.298213	-0.939362	0.229632
rs11078926	chr17:39906723	GSDMB	-6.1839	4.74531e-09	2.0894e-06	-0.530961	0.0858619	-0.699251	-0.362672
rs11078926	chr17:39906723	IKZF3	-0.814336	0.416626	0.998469	-0.161063	0.197784	-0.54872	0.226594
rs11078926	chr17:39906723	MED1	0.538015	0.591292	0.998469	0.0441926	0.0821401	-0.116802	0.205187
rs11078926	chr17:39906723	MED24	0.116046	0.907757	0.998469	0.00518556	0.0446854	-0.0823978	0.0927689
rs11078926	chr17:39906723	MIEN1	-1.0684	0.2869	0.991261	-0.0424816	0.0397618	-0.120415	0.0354516
rs11078926	chr17:39906723	MSL1	-2.31161	0.0220359	0.401731	-0.213019	0.092152	-0.393637	-0.0324011
rs11078926	chr17:39906723	NEUROD2	-0.630295	0.529373	0.998469	-0.125307	0.198807	-0.51497	0.264355
rs11078926	chr17:39906723	NR1D1	-0.502105	0.616263	0.998469	-0.0799619	0.159253	-0.392099	0.232175
rs11078926	chr17:39906723	ORMDL3	0.463431	0.643666	0.998469	0.0222745	0.0480643	-0.0719315	0.11648
rs11078926	chr17:39906723	PGAP3	-3.13149	0.00205787	0.0955141	-0.190223	0.0607452	-0.309284	-0.0711623
rs11078926	chr17:39906723	PPP1R1B	0.0380692	0.969679	0.998469	0.0112456	0.2954	-0.567738	0.59023
rs11078926	chr17:39906723	PSMD3	-0.00803502	0.993599	0.998469	-0.000332341	0.0413616	-0.0814011	0.0807364
rs11078926	chr17:39906723	RAPGEFL1	-0.682238	0.496045	0.998469	-0.0684233	0.100292	-0.264996	0.12815
rs11078926	chr17:39906723	RARA	-2.08704	0.0384213	0.565191	-0.255847	0.122588	-0.49612	-0.0155741
rs11078926	chr17:39906723	STARD3	-0.366416	0.714524	0.998469	-0.0197432	0.0538818	-0.125351	0.0858651
rs11078926	chr17:39906723	TCAP	-1.42366	0.156432	0.942192	-0.244106	0.171463	-0.580174	0.091962
rs11078926	chr17:39906723	THRA	1.63054	0.104895	0.850727	0.15333	0.0940365	-0.0309813	0.337642
rs11078926	chr17:39906723	TOP2A	0.336755	0.736729	0.998469	0.0620262	0.184188	-0.298982	0.423034
rs11078926	chr17:39906723	WIPF2	-0.0516942	0.958835	0.998469	-0.00287223	0.0555619	-0.111774	0.106029
rs883770	chr17:39907128	CASC3	0.0258241	0.979429	0.998469	0.00134418	0.0520514	-0.100677	0.103365
rs883770	chr17:39907128	CDC6	0.339619	0.734575	0.998469	0.0829014	0.244101	-0.395536	0.561339
rs883770	chr17:39907128	CDK12	-0.0495948	0.960505	0.998469	-0.00315985	0.0637134	-0.128038	0.121718
rs883770	chr17:39907128	CSF3	0.265257	0.791143	0.998469	0.0828435	0.312314	-0.529292	0.694979
rs883770	chr17:39907128	ERBB2	-0.590597	0.555599	0.998469	-0.0315807	0.0534726	-0.136387	0.0732255
rs883770	chr17:39907128	GJD3	-0.904179	0.367219	0.998469	-0.122953	0.135983	-0.389478	0.143573
rs883770	chr17:39907128	GRB7	-0.399144	0.690303	0.998469	-0.0373192	0.0934982	-0.220576	0.145937
rs883770	chr17:39907128	GSDMA	-0.70095	0.484322	0.998469	-0.183531	0.261832	-0.696723	0.32966
rs883770	chr17:39907128	GSDMB	-4.37889	2.11198e-05	0.0025027	-0.345814	0.0789729	-0.5006	-0.191027
rs883770	chr17:39907128	IKZF3	-0.356786	0.721708	0.998469	-0.0618856	0.173453	-0.401854	0.278083
rs883770	chr17:39907128	MED1	0.587288	0.557813	0.998469	0.04223	0.0719067	-0.0987072	0.183167
rs883770	chr17:39907128	MED24	1.12936	0.260384	0.987976	0.0440181	0.0389761	-0.032375	0.120411
rs883770	chr17:39907128	MIEN1	-1.46011	0.146161	0.922393	-0.0506814	0.0347107	-0.118714	0.0173515
rs883770	chr17:39907128	MSL1	-2.50572	0.0131893	0.330975	-0.201621	0.0804643	-0.359331	-0.043911
rs883770	chr17:39907128	NEUROD2	-0.0616994	0.950877	0.998469	-0.0107527	0.174276	-0.352333	0.330828
rs883770	chr17:39907128	NR1D1	-0.412241	0.680698	0.998469	-0.0574956	0.139471	-0.330859	0.215868
rs883770	chr17:39907128	ORMDL3	0.536368	0.592427	0.998469	0.0225671	0.042074	-0.0598979	0.105032
rs883770	chr17:39907128	PGAP3	-2.55098	0.011651	0.322749	-0.136976	0.0536953	-0.242219	-0.031733
rs883770	chr17:39907128	PPP1R1B	0.272442	0.785622	0.998469	0.0704493	0.258584	-0.436376	0.577274
rs883770	chr17:39907128	PSMD3	0.032774	0.973894	0.998469	0.00118689	0.0362146	-0.0697936	0.0721674
rs883770	chr17:39907128	RAPGEFL1	-0.108335	0.913862	0.998469	-0.0095262	0.0879329	-0.181875	0.162822
rs883770	chr17:39907128	RARA	-2.83024	0.00522952	0.190077	-0.300554	0.106194	-0.508695	-0.0924141
rs883770	chr17:39907128	STARD3	-0.637531	0.524663	0.998469	-0.0300519	0.047138	-0.122443	0.0623386
rs883770	chr17:39907128	TCAP	-1.07737	0.282887	0.991261	-0.162163	0.150518	-0.457178	0.132851
rs883770	chr17:39907128	THRA	1.25862	0.209945	0.987976	0.103962	0.0825999	-0.0579339	0.265858
rs883770	chr17:39907128	TOP2A	1.13709	0.257151	0.987976	0.182724	0.160695	-0.132238	0.497687
rs883770	chr17:39907128	WIPF2	-0.11792	0.906275	0.998469	-0.00573637	0.0486463	-0.101083	0.0896104
rs62067034	chr17:39907485	CASC3	0.0258241	0.979429	0.998469	0.00134418	0.0520514	-0.100677	0.103365
rs62067034	chr17:39907485	CDC6	0.339619	0.734575	0.998469	0.0829014	0.244101	-0.395536	0.561339
rs62067034	chr17:39907485	CDK12	-0.0495948	0.960505	0.998469	-0.00315985	0.0637134	-0.128038	0.121718
rs62067034	chr17:39907485	CSF3	0.265257	0.791143	0.998469	0.0828435	0.312314	-0.529292	0.694979
rs62067034	chr17:39907485	ERBB2	-0.590597	0.555599	0.998469	-0.0315807	0.0534726	-0.136387	0.0732255
rs62067034	chr17:39907485	GJD3	-0.904179	0.367219	0.998469	-0.122953	0.135983	-0.389478	0.143573
rs62067034	chr17:39907485	GRB7	-0.399144	0.690303	0.998469	-0.0373192	0.0934982	-0.220576	0.145937
rs62067034	chr17:39907485	GSDMA	-0.70095	0.484322	0.998469	-0.183531	0.261832	-0.696723	0.32966
rs62067034	chr17:39907485	GSDMB	-4.37889	2.11198e-05	0.0025027	-0.345814	0.0789729	-0.5006	-0.191027
rs62067034	chr17:39907485	IKZF3	-0.356786	0.721708	0.998469	-0.0618856	0.173453	-0.401854	0.278083
rs62067034	chr17:39907485	MED1	0.587288	0.557813	0.998469	0.04223	0.0719067	-0.0987072	0.183167
rs62067034	chr17:39907485	MED24	1.12936	0.260384	0.987976	0.0440181	0.0389761	-0.032375	0.120411
rs62067034	chr17:39907485	MIEN1	-1.46011	0.146161	0.922393	-0.0506814	0.0347107	-0.118714	0.0173515
rs62067034	chr17:39907485	MSL1	-2.50572	0.0131893	0.330975	-0.201621	0.0804643	-0.359331	-0.043911
rs62067034	chr17:39907485	NEUROD2	-0.0616994	0.950877	0.998469	-0.0107527	0.174276	-0.352333	0.330828
rs62067034	chr17:39907485	NR1D1	-0.412241	0.680698	0.998469	-0.0574956	0.139471	-0.330859	0.215868
rs62067034	chr17:39907485	ORMDL3	0.536368	0.592427	0.998469	0.0225671	0.042074	-0.0598979	0.105032
rs62067034	chr17:39907485	PGAP3	-2.55098	0.011651	0.322749	-0.136976	0.0536953	-0.242219	-0.031733
rs62067034	chr17:39907485	PPP1R1B	0.272442	0.785622	0.998469	0.0704493	0.258584	-0.436376	0.577274
rs62067034	chr17:39907485	PSMD3	0.032774	0.973894	0.998469	0.00118689	0.0362146	-0.0697936	0.0721674
rs62067034	chr17:39907485	RAPGEFL1	-0.108335	0.913862	0.998469	-0.0095262	0.0879329	-0.181875	0.162822
rs62067034	chr17:39907485	RARA	-2.83024	0.00522952	0.190077	-0.300554	0.106194	-0.508695	-0.0924141
rs62067034	chr17:39907485	STARD3	-0.637531	0.524663	0.998469	-0.0300519	0.047138	-0.122443	0.0623386
rs62067034	chr17:39907485	TCAP	-1.07737	0.282887	0.991261	-0.162163	0.150518	-0.457178	0.132851
rs62067034	chr17:39907485	THRA	1.25862	0.209945	0.987976	0.103962	0.0825999	-0.0579339	0.265858
rs62067034	chr17:39907485	TOP2A	1.13709	0.257151	0.987976	0.182724	0.160695	-0.132238	0.497687
rs62067034	chr17:39907485	WIPF2	-0.11792	0.906275	0.998469	-0.00573637	0.0486463	-0.101083	0.0896104
rs36000226	chr17:39907676	CASC3	0.0258241	0.979429	0.998469	0.00134418	0.0520514	-0.100677	0.103365
rs36000226	chr17:39907676	CDC6	0.339619	0.734575	0.998469	0.0829014	0.244101	-0.395536	0.561339
rs36000226	chr17:39907676	CDK12	-0.0495948	0.960505	0.998469	-0.00315985	0.0637134	-0.128038	0.121718
rs36000226	chr17:39907676	CSF3	0.265257	0.791143	0.998469	0.0828435	0.312314	-0.529292	0.694979
rs36000226	chr17:39907676	ERBB2	-0.590597	0.555599	0.998469	-0.0315807	0.0534726	-0.136387	0.0732255
rs36000226	chr17:39907676	GJD3	-0.904179	0.367219	0.998469	-0.122953	0.135983	-0.389478	0.143573
rs36000226	chr17:39907676	GRB7	-0.399144	0.690303	0.998469	-0.0373192	0.0934982	-0.220576	0.145937
rs36000226	chr17:39907676	GSDMA	-0.70095	0.484322	0.998469	-0.183531	0.261832	-0.696723	0.32966
rs36000226	chr17:39907676	GSDMB	-4.37889	2.11198e-05	0.0025027	-0.345814	0.0789729	-0.5006	-0.191027
rs36000226	chr17:39907676	IKZF3	-0.356786	0.721708	0.998469	-0.0618856	0.173453	-0.401854	0.278083
rs36000226	chr17:39907676	MED1	0.587288	0.557813	0.998469	0.04223	0.0719067	-0.0987072	0.183167
rs36000226	chr17:39907676	MED24	1.12936	0.260384	0.987976	0.0440181	0.0389761	-0.032375	0.120411
rs36000226	chr17:39907676	MIEN1	-1.46011	0.146161	0.922393	-0.0506814	0.0347107	-0.118714	0.0173515
rs36000226	chr17:39907676	MSL1	-2.50572	0.0131893	0.330975	-0.201621	0.0804643	-0.359331	-0.043911
rs36000226	chr17:39907676	NEUROD2	-0.0616994	0.950877	0.998469	-0.0107527	0.174276	-0.352333	0.330828
rs36000226	chr17:39907676	NR1D1	-0.412241	0.680698	0.998469	-0.0574956	0.139471	-0.330859	0.215868
rs36000226	chr17:39907676	ORMDL3	0.536368	0.592427	0.998469	0.0225671	0.042074	-0.0598979	0.105032
rs36000226	chr17:39907676	PGAP3	-2.55098	0.011651	0.322749	-0.136976	0.0536953	-0.242219	-0.031733
rs36000226	chr17:39907676	PPP1R1B	0.272442	0.785622	0.998469	0.0704493	0.258584	-0.436376	0.577274
rs36000226	chr17:39907676	PSMD3	0.032774	0.973894	0.998469	0.00118689	0.0362146	-0.0697936	0.0721674
rs36000226	chr17:39907676	RAPGEFL1	-0.108335	0.913862	0.998469	-0.0095262	0.0879329	-0.181875	0.162822
rs36000226	chr17:39907676	RARA	-2.83024	0.00522952	0.190077	-0.300554	0.106194	-0.508695	-0.0924141
rs36000226	chr17:39907676	STARD3	-0.637531	0.524663	0.998469	-0.0300519	0.047138	-0.122443	0.0623386
rs36000226	chr17:39907676	TCAP	-1.07737	0.282887	0.991261	-0.162163	0.150518	-0.457178	0.132851
rs36000226	chr17:39907676	THRA	1.25862	0.209945	0.987976	0.103962	0.0825999	-0.0579339	0.265858
rs36000226	chr17:39907676	TOP2A	1.13709	0.257151	0.987976	0.182724	0.160695	-0.132238	0.497687
rs36000226	chr17:39907676	WIPF2	-0.11792	0.906275	0.998469	-0.00573637	0.0486463	-0.101083	0.0896104
rs11078927	chr17:39908152	CASC3	-0.402344	0.687951	0.998469	-0.0241979	0.0601424	-0.142077	0.0936811
rs11078927	chr17:39908152	CDC6	-0.212687	0.831834	0.998469	-0.0600293	0.282242	-0.613224	0.493166
rs11078927	chr17:39908152	CDK12	0.189928	0.849599	0.998469	0.0139873	0.0736456	-0.130358	0.158333
rs11078927	chr17:39908152	CSF3	-0.493951	0.621998	0.998469	-0.178241	0.360847	-0.885502	0.52902
rs11078927	chr17:39908152	ERBB2	-0.929274	0.354104	0.998469	-0.0573536	0.0617186	-0.178322	0.063615
rs11078927	chr17:39908152	GJD3	-1.51567	0.131515	0.916586	-0.237203	0.1565	-0.543943	0.0695369
rs11078927	chr17:39908152	GRB7	-0.13298	0.894371	0.998469	-0.0143792	0.108131	-0.226316	0.197557
rs11078927	chr17:39908152	GSDMA	-1.64049	0.102808	0.84532	-0.493277	0.300688	-1.08263	0.096072
rs11078927	chr17:39908152	GSDMB	-6.19328	4.52155e-09	2.0894e-06	-0.538078	0.0868809	-0.708365	-0.367791
rs11078927	chr17:39908152	IKZF3	-0.619942	0.536151	0.998469	-0.12421	0.200357	-0.51691	0.268491
rs11078927	chr17:39908152	MED1	0.542957	0.587892	0.998469	0.04514	0.0831373	-0.117809	0.208089
rs11078927	chr17:39908152	MED24	0.270965	0.786756	0.998469	0.0122532	0.0452204	-0.0763788	0.100885
rs11078927	chr17:39908152	MIEN1	-0.942693	0.347216	0.998469	-0.0379678	0.0402759	-0.116908	0.0409729
rs11078927	chr17:39908152	MSL1	-2.43648	0.0158942	0.352013	-0.226861	0.0931103	-0.409358	-0.0443652
rs11078927	chr17:39908152	NEUROD2	-0.469516	0.639321	0.998469	-0.0945285	0.201332	-0.489139	0.300082
rs11078927	chr17:39908152	NR1D1	-0.779044	0.437069	0.998469	-0.125439	0.161017	-0.441032	0.190153
rs11078927	chr17:39908152	ORMDL3	0.786166	0.432898	0.998469	0.0381993	0.0485893	-0.0570358	0.133434
rs11078927	chr17:39908152	PGAP3	-3.36961	0.000937237	0.0569768	-0.206265	0.0612132	-0.326243	-0.0862869
rs11078927	chr17:39908152	PPP1R1B	0.125523	0.900262	0.998469	0.0375287	0.298978	-0.548468	0.623526
rs11078927	chr17:39908152	PSMD3	-0.00028081	0.999776	0.999776	-1.17559e-05	0.0418644	-0.082066	0.0820425
rs11078927	chr17:39908152	RAPGEFL1	-1.0667	0.287666	0.991261	-0.108063	0.101306	-0.306623	0.0904966
rs11078927	chr17:39908152	RARA	-2.43698	0.0158729	0.352013	-0.300974	0.123503	-0.543039	-0.0589087
rs11078927	chr17:39908152	STARD3	-0.405986	0.685279	0.998469	-0.0221391	0.0545317	-0.129021	0.0847431
rs11078927	chr17:39908152	TCAP	-1.54514	0.124229	0.898459	-0.267866	0.173361	-0.607653	0.071921
rs11078927	chr17:39908152	THRA	1.66464	0.0978833	0.838494	0.158386	0.0951478	-0.0281032	0.344876
rs11078927	chr17:39908152	TOP2A	0.396051	0.692579	0.998469	0.0738248	0.186402	-0.291524	0.439174
rs11078927	chr17:39908152	WIPF2	-0.375127	0.708048	0.998469	-0.0210874	0.0562139	-0.131267	0.0890919
rs11078928	chr17:39908216	CASC3	0.608956	0.543391	0.998469	0.0370292	0.0608077	-0.0821538	0.156212
rs11078928	chr17:39908216	CDC6	-0.185706	0.852904	0.998469	-0.053029	0.285554	-0.612715	0.506657
rs11078928	chr17:39908216	CDK12	-0.0379467	0.969776	0.998469	-0.00282761	0.0745152	-0.148877	0.143222
rs11078928	chr17:39908216	CSF3	0.46083	0.645527	0.998469	0.168251	0.365105	-0.547354	0.883857
rs11078928	chr17:39908216	ERBB2	0.886232	0.376782	0.998469	0.0553501	0.0624555	-0.0670628	0.177763
rs11078928	chr17:39908216	GJD3	1.50702	0.133717	0.916586	0.238628	0.158344	-0.0717258	0.548981
rs11078928	chr17:39908216	GRB7	0.0113364	0.990969	0.998469	0.00124022	0.109402	-0.213188	0.215668
rs11078928	chr17:39908216	GSDMA	1.7858	0.0759676	0.760383	0.542449	0.303756	-0.0529129	1.13781
rs11078928	chr17:39908216	GSDMB	6.24283	3.50139e-09	2.0894e-06	0.5479	0.0877646	0.375881	0.719919
rs11078928	chr17:39908216	IKZF3	0.793652	0.428538	0.998469	0.160755	0.202551	-0.236245	0.557756
rs11078928	chr17:39908216	MED1	-0.680536	0.497119	0.998469	-0.0572108	0.0840673	-0.221983	0.107561
rs11078928	chr17:39908216	MED24	-0.19403	0.846391	0.998469	-0.00887772	0.0457545	-0.0985565	0.0808011
rs11078928	chr17:39908216	MIEN1	0.840243	0.401988	0.998469	0.0342564	0.0407696	-0.045652	0.114165
rs11078928	chr17:39908216	MSL1	2.33274	0.0208689	0.397441	0.220062	0.0943364	0.0351628	0.404962
rs11078928	chr17:39908216	NEUROD2	0.508555	0.611744	0.998469	0.103574	0.203664	-0.295608	0.502756
rs11078928	chr17:39908216	NR1D1	0.644289	0.520283	0.998469	0.105016	0.162995	-0.214454	0.424486
rs11078928	chr17:39908216	ORMDL3	-0.647207	0.518397	0.998469	-0.0318345	0.0491875	-0.128242	0.0645729
rs11078928	chr17:39908216	PGAP3	3.43326	0.000754057	0.0561822	0.21236	0.0618536	0.0911266	0.333593
rs11078928	chr17:39908216	PPP1R1B	-0.0880395	0.929952	0.998469	-0.0266305	0.302484	-0.619499	0.566238
rs11078928	chr17:39908216	PSMD3	-0.111468	0.911381	0.998469	-0.00472098	0.0423527	-0.0877322	0.0782903
rs11078928	chr17:39908216	RAPGEFL1	1.22242	0.223294	0.987976	0.125153	0.102382	-0.075515	0.325821
rs11078928	chr17:39908216	RARA	2.20516	0.0288258	0.462296	0.276401	0.125343	0.0307291	0.522073
rs11078928	chr17:39908216	STARD3	0.302312	0.762795	0.998469	0.0166822	0.0551821	-0.0914747	0.124839
rs11078928	chr17:39908216	TCAP	1.77714	0.0773877	0.760682	0.310976	0.174987	-0.0319983	0.65395
rs11078928	chr17:39908216	THRA	-1.47733	0.141493	0.916586	-0.14246	0.0964304	-0.331463	0.0465438
rs11078928	chr17:39908216	TOP2A	-0.253544	0.800164	0.998469	-0.0478276	0.188636	-0.417555	0.3219
rs11078928	chr17:39908216	WIPF2	0.213707	0.831039	0.998469	0.0121574	0.056888	-0.0993431	0.123658
rs150276395	chr17:39908449	CASC3	0.993929	0.321713	0.998469	0.0510839	0.0513959	-0.0496521	0.15182
rs150276395	chr17:39908449	CDC6	0.932471	0.352456	0.998469	0.224909	0.241197	-0.247837	0.697655
rs150276395	chr17:39908449	CDK12	-0.883277	0.378372	0.998469	-0.055603	0.0629508	-0.178987	0.0677806
rs150276395	chr17:39908449	CSF3	0.207356	0.835988	0.998469	0.0641409	0.309328	-0.542142	0.670424
rs150276395	chr17:39908449	ERBB2	0.904238	0.367187	0.998469	0.0478179	0.052882	-0.0558308	0.151467
rs150276395	chr17:39908449	GJD3	-0.881923	0.379101	0.998469	-0.118784	0.134687	-0.382771	0.145203
rs150276395	chr17:39908449	GRB7	-0.266769	0.78998	0.998469	-0.0247085	0.0926213	-0.206246	0.156829
rs150276395	chr17:39908449	GSDMA	2.5906	0.0104387	0.322749	0.659483	0.254568	0.16053	1.15844
rs150276395	chr17:39908449	GSDMB	0.66555	0.506628	0.998469	0.0549214	0.0825203	-0.106818	0.216661
rs150276395	chr17:39908449	IKZF3	0.753626	0.452148	0.998469	0.129286	0.171552	-0.206956	0.465528
rs150276395	chr17:39908449	MED1	0.863985	0.38885	0.998469	0.0614527	0.0711271	-0.0779563	0.200862
rs150276395	chr17:39908449	MED24	-0.614888	0.539476	0.998469	-0.0237991	0.0387049	-0.0996607	0.0520624
rs150276395	chr17:39908449	MIEN1	-0.432668	0.665821	0.998469	-0.0149607	0.0345777	-0.082733	0.0528117
rs150276395	chr17:39908449	MSL1	-0.460495	0.645767	0.998469	-0.0373638	0.0811383	-0.196395	0.121667
rs150276395	chr17:39908449	NEUROD2	-0.399463	0.690069	0.998469	-0.068913	0.172514	-0.40704	0.269214
rs150276395	chr17:39908449	NR1D1	1.38764	0.167119	0.94622	0.190658	0.137398	-0.0786415	0.459958
rs150276395	chr17:39908449	ORMDL3	-0.194548	0.845986	0.998469	-0.00811263	0.0416998	-0.0898443	0.0736191
rs150276395	chr17:39908449	PGAP3	1.53464	0.126787	0.898459	0.0826148	0.0538332	-0.0228983	0.188128
rs150276395	chr17:39908449	PPP1R1B	-0.745383	0.457101	0.998469	-0.190608	0.255718	-0.691816	0.3106
rs150276395	chr17:39908449	PSMD3	-0.0175185	0.986044	0.998469	-0.000628308	0.0358654	-0.0709246	0.069668
rs150276395	chr17:39908449	RAPGEFL1	0.793364	0.428705	0.998469	0.0689612	0.0869225	-0.101407	0.239329
rs150276395	chr17:39908449	RARA	1.15045	0.251622	0.987976	0.123401	0.107263	-0.0868347	0.333638
rs150276395	chr17:39908449	STARD3	0.152027	0.879352	0.998469	0.00710537	0.0467377	-0.0845005	0.0987112
rs150276395	chr17:39908449	TCAP	0.857623	0.392345	0.998469	0.128007	0.149257	-0.164538	0.420551
rs150276395	chr17:39908449	THRA	0.98	0.328521	0.998469	0.0803179	0.081957	-0.0803179	0.240954
rs150276395	chr17:39908449	TOP2A	0.454456	0.650098	0.998469	0.0725621	0.159668	-0.240387	0.385511
rs150276395	chr17:39908449	WIPF2	0.781054	0.43589	0.998469	0.0375612	0.0480905	-0.0566961	0.131819
rs12939832	chr17:39908623	CASC3	-0.371745	0.71056	0.998469	-0.0223657	0.0601642	-0.140288	0.0955561
rs12939832	chr17:39908623	CDC6	-0.281758	0.778482	0.998469	-0.079539	0.282295	-0.632838	0.47376
rs12939832	chr17:39908623	CDK12	0.237072	0.812895	0.998469	0.0174633	0.0736625	-0.126915	0.161842
rs12939832	chr17:39908623	CSF3	-0.468585	0.639985	0.998469	-0.169149	0.360979	-0.876668	0.53837
rs12939832	chr17:39908623	ERBB2	-0.884707	0.377602	0.998469	-0.0546321	0.0617517	-0.175665	0.0664011
rs12939832	chr17:39908623	GJD3	-1.54864	0.123385	0.898459	-0.242359	0.156498	-0.549096	0.0643774
rs12939832	chr17:39908623	GRB7	-0.13115	0.895816	0.998469	-0.0141855	0.108163	-0.226184	0.197813
rs12939832	chr17:39908623	GSDMA	-1.66948	0.096919	0.836956	-0.501995	0.30069	-1.09135	0.0873572
rs12939832	chr17:39908623	GSDMB	-6.14223	5.87736e-09	2.0894e-06	-0.534626	0.0870411	-0.705226	-0.364025
rs12939832	chr17:39908623	IKZF3	-0.607074	0.544636	0.998469	-0.121673	0.200425	-0.514506	0.27116
rs12939832	chr17:39908623	MED1	0.554676	0.579868	0.998469	0.0461259	0.0831582	-0.116864	0.209116
rs12939832	chr17:39908623	MED24	0.291927	0.770709	0.998469	0.0132044	0.0452319	-0.0754502	0.101859
rs12939832	chr17:39908623	MIEN1	-0.926357	0.355614	0.998469	-0.0373241	0.0402913	-0.116295	0.0416468
rs12939832	chr17:39908623	MSL1	-2.47473	0.0143445	0.351521	-0.230364	0.0930863	-0.412813	-0.0479145
rs12939832	chr17:39908623	NEUROD2	-0.505844	0.613641	0.998469	-0.101861	0.201369	-0.496545	0.292822
rs12939832	chr17:39908623	NR1D1	-0.78453	0.433854	0.998469	-0.126356	0.161059	-0.442032	0.18932
rs12939832	chr17:39908623	ORMDL3	0.806584	0.421067	0.998469	0.0391989	0.0485987	-0.0560545	0.134452
rs12939832	chr17:39908623	PGAP3	-3.35343	0.00099005	0.0569768	-0.205397	0.06125	-0.325447	-0.0853473
rs12939832	chr17:39908623	PPP1R1B	0.137696	0.890648	0.998469	0.0411797	0.299062	-0.544982	0.627342
rs12939832	chr17:39908623	PSMD3	-0.0202177	0.983894	0.998469	-0.000846647	0.0418765	-0.0829247	0.0812314
rs12939832	chr17:39908623	RAPGEFL1	-1.05707	0.292024	0.998469	-0.107125	0.101342	-0.305755	0.0915042
rs12939832	chr17:39908623	RARA	-2.42067	0.0165767	0.357153	-0.299116	0.123567	-0.541308	-0.0569241
rs12939832	chr17:39908623	STARD3	-0.386252	0.699808	0.998469	-0.0210701	0.0545502	-0.127988	0.0858483
rs12939832	chr17:39908623	TCAP	-1.48133	0.140426	0.916586	-0.257027	0.173511	-0.597109	0.083055
rs12939832	chr17:39908623	THRA	1.64834	0.101186	0.842124	0.156907	0.0951908	-0.0296673	0.34348
rs12939832	chr17:39908623	TOP2A	0.400309	0.689447	0.998469	0.0746395	0.186455	-0.290812	0.440091
rs12939832	chr17:39908623	WIPF2	-0.358978	0.72007	0.998469	-0.0201862	0.0562323	-0.130401	0.0900291
chr17:39908771	chr17:39908771	CASC3	-1.39777	0.16406	0.94622	-0.10106	0.0723008	-0.242769	0.04065
chr17:39908771	chr17:39908771	CDC6	-0.399299	0.690189	0.998469	-0.136168	0.341018	-0.804564	0.532227
chr17:39908771	chr17:39908771	CDK12	-0.102026	0.91886	0.998469	-0.00908233	0.0890198	-0.183561	0.165396
chr17:39908771	chr17:39908771	CSF3	-0.432192	0.666166	0.998469	-0.188531	0.436219	-1.04352	0.666459
chr17:39908771	chr17:39908771	ERBB2	-0.794332	0.428143	0.998469	-0.0592965	0.0746495	-0.205609	0.0870166
chr17:39908771	chr17:39908771	GJD3	0.321507	0.748233	0.998469	0.0612178	0.190409	-0.311983	0.434419
chr17:39908771	chr17:39908771	GRB7	-0.167125	0.867476	0.998469	-0.0218416	0.13069	-0.277994	0.234311
chr17:39908771	chr17:39908771	GSDMA	-1.02844	0.305249	0.998469	-0.375601	0.365214	-1.09142	0.340219
chr17:39908771	chr17:39908771	GSDMB	0.00750249	0.994023	0.998469	0.000874627	0.116578	-0.227619	0.229368
chr17:39908771	chr17:39908771	IKZF3	0.944121	0.346488	0.998469	0.228283	0.241794	-0.245634	0.702201
chr17:39908771	chr17:39908771	MED1	-0.54208	0.588495	0.998469	-0.0544711	0.100485	-0.251423	0.14248
chr17:39908771	chr17:39908771	MED24	0.991827	0.322734	0.998469	0.0540607	0.0545062	-0.0527715	0.160893
chr17:39908771	chr17:39908771	MIEN1	1.6038	0.110671	0.877553	0.0776797	0.0484349	-0.0172526	0.172612
chr17:39908771	chr17:39908771	MSL1	3.11427	0.00217462	0.0966345	0.346683	0.111321	0.128495	0.564872
chr17:39908771	chr17:39908771	NEUROD2	0.50066	0.617278	0.998469	0.121821	0.243321	-0.355088	0.598729
chr17:39908771	chr17:39908771	NR1D1	-0.694428	0.488391	0.998469	-0.135197	0.194688	-0.516786	0.246392
chr17:39908771	chr17:39908771	ORMDL3	-0.475916	0.634763	0.998469	-0.0279828	0.0587977	-0.143226	0.0872608
chr17:39908771	chr17:39908771	PGAP3	-2.4638	0.0147731	0.351521	-0.185081	0.0751202	-0.332317	-0.0378454
chr17:39908771	chr17:39908771	PPP1R1B	-0.69665	0.487002	0.998469	-0.251387	0.360851	-0.958656	0.455881
chr17:39908771	chr17:39908771	PSMD3	-1.8624	0.0643245	0.717102	-0.0932624	0.0500764	-0.191412	0.00488738
chr17:39908771	chr17:39908771	RAPGEFL1	-0.135993	0.891992	0.998469	-0.0167081	0.12286	-0.257513	0.224097
chr17:39908771	chr17:39908771	RARA	1.80606	0.0727321	0.753094	0.271732	0.150456	-0.0231617	0.566626
chr17:39908771	chr17:39908771	STARD3	-2.08406	0.0386956	0.565327	-0.135656	0.0650924	-0.263237	-0.00807532
chr17:39908771	chr17:39908771	TCAP	0.444123	0.657536	0.998469	0.093674	0.210919	-0.319728	0.507076
chr17:39908771	chr17:39908771	THRA	-0.80961	0.41933	0.998469	-0.0936992	0.115734	-0.320537	0.133139
chr17:39908771	chr17:39908771	TOP2A	0.0334159	0.973383	0.998469	0.00753209	0.225404	-0.43426	0.449325
chr17:39908771	chr17:39908771	WIPF2	0.565376	0.572586	0.998469	0.038393	0.067907	-0.0947047	0.171491
chr17:39909171	chr17:39909171	CASC3	-0.305954	0.760026	0.998469	-0.0132042	0.0431577	-0.0977933	0.0713848
chr17:39909171	chr17:39909171	CDC6	0.441234	0.659621	0.998469	0.0893064	0.202401	-0.3074	0.486013
chr17:39909171	chr17:39909171	CDK12	-0.950802	0.343095	0.998469	-0.0501055	0.0526982	-0.153394	0.0531828
chr17:39909171	chr17:39909171	CSF3	-0.104452	0.916937	0.998469	-0.0270605	0.25907	-0.534838	0.480718
chr17:39909171	chr17:39909171	ERBB2	0.850434	0.396316	0.998469	0.0376728	0.0442984	-0.049152	0.124498
chr17:39909171	chr17:39909171	GJD3	-0.132933	0.894408	0.998469	-0.0150285	0.113053	-0.236612	0.206555
chr17:39909171	chr17:39909171	GRB7	0.450443	0.652982	0.998469	0.0349248	0.0775343	-0.117042	0.186892
chr17:39909171	chr17:39909171	GSDMA	1.94547	0.053418	0.717102	0.418328	0.215027	-0.00312448	0.83978
chr17:39909171	chr17:39909171	GSDMB	0.649164	0.517135	0.998469	0.0448642	0.0691107	-0.0905929	0.180321
chr17:39909171	chr17:39909171	IKZF3	0.648595	0.517502	0.998469	0.0932221	0.143729	-0.188487	0.374931
chr17:39909171	chr17:39909171	MED1	0.712515	0.477153	0.998469	0.0424715	0.0596079	-0.07436	0.159303
chr17:39909171	chr17:39909171	MED24	0.105559	0.91606	0.998469	0.00342531	0.0324492	-0.0601751	0.0670257
chr17:39909171	chr17:39909171	MIEN1	0.755731	0.450888	0.998469	0.0218583	0.0289233	-0.0348315	0.078548
chr17:39909171	chr17:39909171	MSL1	2.0428	0.0426633	0.594776	0.137171	0.0671486	0.00555997	0.268783
chr17:39909171	chr17:39909171	NEUROD2	0.874303	0.383224	0.998469	0.126081	0.144207	-0.156565	0.408727
chr17:39909171	chr17:39909171	NR1D1	1.1415	0.255315	0.987976	0.13159	0.115278	-0.0943551	0.357536
chr17:39909171	chr17:39909171	ORMDL3	-0.822961	0.411718	0.998469	-0.0286834	0.0348539	-0.0969969	0.0396302
chr17:39909171	chr17:39909171	PGAP3	0.171532	0.864016	0.998469	0.00778735	0.0453989	-0.0811945	0.0967692
chr17:39909171	chr17:39909171	PPP1R1B	-1.1058	0.270425	0.990265	-0.23633	0.21372	-0.655221	0.18256
chr17:39909171	chr17:39909171	PSMD3	0.15169	0.879617	0.998469	0.00455575	0.0300333	-0.0543094	0.0634209
chr17:39909171	chr17:39909171	RAPGEFL1	0.668065	0.505026	0.998469	0.0486572	0.072833	-0.0940956	0.19141
chr17:39909171	chr17:39909171	RARA	2.44178	0.0156708	0.352013	0.216342	0.0886001	0.042686	0.389998
chr17:39909171	chr17:39909171	STARD3	0.132759	0.894546	0.998469	0.0051963	0.0391409	-0.0715198	0.0819124
chr17:39909171	chr17:39909171	TCAP	1.02903	0.304972	0.998469	0.128498	0.124873	-0.116253	0.373249
chr17:39909171	chr17:39909171	THRA	1.65427	0.0999745	0.842124	0.112937	0.0682701	-0.0208725	0.246746
chr17:39909171	chr17:39909171	TOP2A	-0.527326	0.598675	0.998469	-0.0704952	0.133684	-0.332516	0.191526
chr17:39909171	chr17:39909171	WIPF2	1.22233	0.223324	0.987976	0.0490963	0.040166	-0.0296291	0.127822
chr17:39909987	chr17:39909987	CASC3	-0.219641	0.826422	0.998469	-0.00837869	0.0381471	-0.0831471	0.0663897
chr17:39909987	chr17:39909987	CDC6	0.570983	0.568788	0.998469	0.102096	0.178807	-0.248366	0.452558
chr17:39909987	chr17:39909987	CDK12	-0.871904	0.384528	0.998469	-0.0406253	0.0465938	-0.131949	0.0506985
chr17:39909987	chr17:39909987	CSF3	-0.241921	0.809142	0.998469	-0.0553825	0.228928	-0.504082	0.393317
chr17:39909987	chr17:39909987	ERBB2	0.248694	0.803907	0.998469	0.00975587	0.0392284	-0.0671318	0.0866435
chr17:39909987	chr17:39909987	GJD3	-0.83073	0.407326	0.998469	-0.0828328	0.0997109	-0.278266	0.1126
chr17:39909987	chr17:39909987	GRB7	0.139292	0.889389	0.998469	0.00955005	0.0685613	-0.12483	0.14393
chr17:39909987	chr17:39909987	GSDMA	1.1386	0.256519	0.987976	0.217989	0.191453	-0.157259	0.593237
chr17:39909987	chr17:39909987	GSDMB	-2.35006	0.0199535	0.383432	-0.141375	0.0601581	-0.259285	-0.023465
chr17:39909987	chr17:39909987	IKZF3	0.249189	0.803524	0.998469	0.0316876	0.127163	-0.217552	0.280927
chr17:39909987	chr17:39909987	MED1	0.90524	0.366658	0.998469	0.0476435	0.0526308	-0.0555128	0.1508
chr17:39909987	chr17:39909987	MED24	0.839864	0.4022	0.998469	0.0240351	0.0286178	-0.0320559	0.080126
chr17:39909987	chr17:39909987	MIEN1	-0.203876	0.838701	0.998469	-0.00521982	0.0256029	-0.0554014	0.0449618
chr17:39909987	chr17:39909987	MSL1	0.0642115	0.94888	0.998469	0.00385844	0.0600896	-0.113917	0.121634
chr17:39909987	chr17:39909987	NEUROD2	0.629705	0.529759	0.998469	0.0803434	0.127589	-0.169731	0.330418
chr17:39909987	chr17:39909987	NR1D1	0.586601	0.558273	0.998469	0.0599363	0.102176	-0.140328	0.260201
chr17:39909987	chr17:39909987	ORMDL3	-0.528186	0.59808	0.998469	-0.0162894	0.0308402	-0.0767362	0.0441575
chr17:39909987	chr17:39909987	PGAP3	-1.78752	0.0756885	0.760383	-0.071042	0.0397433	-0.148939	0.00685479
chr17:39909987	chr17:39909987	PPP1R1B	-0.808154	0.420166	0.998469	-0.152907	0.189206	-0.52375	0.217936
chr17:39909987	chr17:39909987	PSMD3	0.136188	0.891839	0.998469	0.00361485	0.0265432	-0.0484097	0.0556394
chr17:39909987	chr17:39909987	RAPGEFL1	0.563206	0.574059	0.998469	0.0362668	0.0643935	-0.0899445	0.162478
chr17:39909987	chr17:39909987	RARA	0.157306	0.875196	0.998469	0.0125371	0.0796992	-0.143673	0.168748
chr17:39909987	chr17:39909987	STARD3	-0.29356	0.769463	0.998469	-0.0101527	0.0345848	-0.0779388	0.0576334
chr17:39909987	chr17:39909987	TCAP	0.114099	0.909298	0.998469	0.0126318	0.110709	-0.204359	0.229622
chr17:39909987	chr17:39909987	THRA	2.36452	0.0192164	0.382537	0.141466	0.0598289	0.0242018	0.258731
chr17:39909987	chr17:39909987	TOP2A	0.314277	0.753708	0.998469	0.0371512	0.118212	-0.194543	0.268846
chr17:39909987	chr17:39909987	WIPF2	0.80147	0.424012	0.998469	0.0285236	0.0355891	-0.041231	0.0982782
rs1008723	chr17:39910014	CASC3	-0.340784	0.7337	0.998469	-0.0149795	0.043956	-0.101133	0.0711743
rs1008723	chr17:39910014	CDC6	-0.349657	0.727042	0.998469	-0.0721008	0.206205	-0.476262	0.33206
rs1008723	chr17:39910014	CDK12	-0.687878	0.492495	0.998469	-0.036971	0.0537465	-0.142314	0.0683721
rs1008723	chr17:39910014	CSF3	-0.962567	0.337173	0.998469	-0.253301	0.263152	-0.769079	0.262476
rs1008723	chr17:39910014	ERBB2	-0.579194	0.563248	0.998469	-0.0261644	0.0451738	-0.114705	0.0623762
rs1008723	chr17:39910014	GJD3	-0.791415	0.429838	0.998469	-0.0909654	0.11494	-0.316248	0.134317
rs1008723	chr17:39910014	GRB7	-0.258834	0.796086	0.998469	-0.0204495	0.0790065	-0.175302	0.134403
rs1008723	chr17:39910014	GSDMA	-0.980119	0.328462	0.998469	-0.216484	0.220875	-0.649399	0.216431
rs1008723	chr17:39910014	GSDMB	-3.86846	0.000157382	0.0176681	-0.261081	0.0674897	-0.393361	-0.128802
rs1008723	chr17:39910014	IKZF3	-0.378598	0.705473	0.998469	-0.0554725	0.146521	-0.342654	0.231708
rs1008723	chr17:39910014	MED1	-0.153221	0.878411	0.998469	-0.00931644	0.0608037	-0.128492	0.109859
rs1008723	chr17:39910014	MED24	1.88231	0.0615549	0.717102	0.0615582	0.0327036	-0.00254083	0.125657
rs1008723	chr17:39910014	MIEN1	0.446164	0.656064	0.998469	0.013159	0.0294936	-0.0446484	0.0709663
rs1008723	chr17:39910014	MSL1	-0.136267	0.891776	0.998469	-0.00943665	0.0692511	-0.145169	0.126295
rs1008723	chr17:39910014	NEUROD2	0.24812	0.80435	0.998469	0.0365226	0.147197	-0.251984	0.325029
rs1008723	chr17:39910014	NR1D1	-0.368287	0.713132	0.998469	-0.0433964	0.117833	-0.274349	0.187556
rs1008723	chr17:39910014	ORMDL3	0.0483545	0.961492	0.998469	0.00172014	0.0355736	-0.068004	0.0714443
rs1008723	chr17:39910014	PGAP3	-3.66329	0.00033513	0.0324923	-0.162917	0.0444728	-0.250084	-0.0757501
rs1008723	chr17:39910014	PPP1R1B	0.164084	0.869866	0.998469	0.0358482	0.218475	-0.392364	0.46406
rs1008723	chr17:39910014	PSMD3	-0.522355	0.602123	0.998469	-0.0159672	0.0305678	-0.0758801	0.0439456
rs1008723	chr17:39910014	RAPGEFL1	-0.512941	0.608679	0.998469	-0.0380738	0.0742265	-0.183558	0.10741
rs1008723	chr17:39910014	RARA	-0.960274	0.338322	0.998469	-0.0879665	0.0916056	-0.267514	0.0915805
rs1008723	chr17:39910014	STARD3	-1.40083	0.163141	0.94622	-0.0555218	0.0396348	-0.133206	0.0221624
rs1008723	chr17:39910014	TCAP	-0.659423	0.510543	0.998469	-0.0840312	0.127431	-0.333797	0.165734
rs1008723	chr17:39910014	THRA	1.19803	0.232623	0.987976	0.0836334	0.0698091	-0.0531924	0.220459
rs1008723	chr17:39910014	TOP2A	0.259015	0.795946	0.998469	0.0352917	0.136253	-0.231765	0.302348
rs1008723	chr17:39910014	WIPF2	0.120975	0.903858	0.998469	0.00497147	0.0410948	-0.0755744	0.0855173
chr17:39910119	chr17:39910119	CASC3	0.0563679	0.955117	0.998469	0.00212462	0.0376921	-0.0717519	0.0760011
chr17:39910119	chr17:39910119	CDC6	0.410584	0.68191	0.998469	0.0725643	0.176734	-0.273835	0.418963
chr17:39910119	chr17:39910119	CDK12	-0.704684	0.482001	0.998469	-0.0324636	0.0460683	-0.122758	0.0578303
chr17:39910119	chr17:39910119	CSF3	-0.132859	0.894467	0.998469	-0.0300519	0.226195	-0.473393	0.413289
chr17:39910119	chr17:39910119	ERBB2	0.510865	0.610129	0.998469	0.0197867	0.0387318	-0.0561276	0.095701
chr17:39910119	chr17:39910119	GJD3	-0.354858	0.723149	0.998469	-0.035016	0.0986761	-0.228421	0.158389
chr17:39910119	chr17:39910119	GRB7	-0.224039	0.823004	0.998469	-0.0151737	0.0677279	-0.14792	0.117573
chr17:39910119	chr17:39910119	GSDMA	1.40605	0.16159	0.94622	0.265402	0.188757	-0.104562	0.635367
chr17:39910119	chr17:39910119	GSDMB	-2.05067	0.0418807	0.593233	-0.12235	0.0596633	-0.23929	-0.00540974
chr17:39910119	chr17:39910119	IKZF3	0.125409	0.900353	0.998469	0.0157572	0.125647	-0.23051	0.262024
chr17:39910119	chr17:39910119	MED1	0.993509	0.321917	0.998469	0.0516323	0.0519696	-0.0502281	0.153493
chr17:39910119	chr17:39910119	MED24	0.69079	0.490668	0.998469	0.0195439	0.0282921	-0.0359086	0.0749963
chr17:39910119	chr17:39910119	MIEN1	-0.256806	0.797648	0.998469	-0.00649517	0.0252921	-0.0560677	0.0430774
chr17:39910119	chr17:39910119	MSL1	-0.0313511	0.975027	0.998469	-0.00186117	0.0593653	-0.118217	0.114495
chr17:39910119	chr17:39910119	NEUROD2	0.483513	0.629373	0.998469	0.0609768	0.126112	-0.186203	0.308156
chr17:39910119	chr17:39910119	NR1D1	0.688928	0.491836	0.998469	0.069515	0.100903	-0.128255	0.267285
chr17:39910119	chr17:39910119	ORMDL3	-0.564551	0.573146	0.998469	-0.0171988	0.0304645	-0.0769093	0.0425117
chr17:39910119	chr17:39910119	PGAP3	-1.35825	0.17624	0.958979	-0.0535453	0.0394224	-0.130813	0.0237226
chr17:39910119	chr17:39910119	PPP1R1B	-0.632943	0.527647	0.998469	-0.118402	0.187066	-0.485051	0.248247
chr17:39910119	chr17:39910119	PSMD3	0.222441	0.824246	0.998469	0.00583251	0.0262205	-0.0455597	0.0572247
chr17:39910119	chr17:39910119	RAPGEFL1	0.622052	0.534766	0.998469	0.0395646	0.0636033	-0.0850979	0.164227
chr17:39910119	chr17:39910119	RARA	-0.214813	0.830178	0.998469	-0.0169128	0.0787326	-0.171229	0.137403
chr17:39910119	chr17:39910119	STARD3	-0.224191	0.822886	0.998469	-0.00766088	0.0341713	-0.0746365	0.0593148
chr17:39910119	chr17:39910119	TCAP	0.110834	0.911882	0.998469	0.0121224	0.109374	-0.202251	0.226496
chr17:39910119	chr17:39910119	THRA	2.04804	0.0421412	0.593233	0.121552	0.0593506	0.00522505	0.237879
chr17:39910119	chr17:39910119	TOP2A	-0.0135497	0.989206	0.998469	-0.00158288	0.11682	-0.230551	0.227385
chr17:39910119	chr17:39910119	WIPF2	0.956561	0.340188	0.998469	0.0336048	0.0351309	-0.0352517	0.102461
chr17:39910256	chr17:39910256	CASC3	-0.711357	0.477867	0.998469	-0.0563723	0.0792462	-0.211695	0.0989502
chr17:39910256	chr17:39910256	CDC6	0.297458	0.766491	0.998469	0.110724	0.372233	-0.618853	0.840301
chr17:39910256	chr17:39910256	CDK12	-1.25397	0.211626	0.987976	-0.121247	0.0966906	-0.310761	0.0682664
chr17:39910256	chr17:39910256	CSF3	0.29787	0.766177	0.998469	0.141842	0.476187	-0.791485	1.07517
chr17:39910256	chr17:39910256	ERBB2	0.0810909	0.935468	0.998469	0.00661855	0.081619	-0.153355	0.166592
chr17:39910256	chr17:39910256	GJD3	-1.351	0.178546	0.969004	-0.279275	0.206718	-0.684442	0.125892
chr17:39910256	chr17:39910256	GRB7	0.277654	0.781625	0.998469	0.0395937	0.142601	-0.239903	0.319091
chr17:39910256	chr17:39910256	GSDMA	-1.85846	0.0648855	0.717102	-0.735417	0.395713	-1.51101	0.0401817
chr17:39910256	chr17:39910256	GSDMB	1.29974	0.195504	0.972286	0.164515	0.126575	-0.0835729	0.412603
chr17:39910256	chr17:39910256	IKZF3	-1.37746	0.170236	0.94622	-0.362373	0.263074	-0.877998	0.153251
chr17:39910256	chr17:39910256	MED1	-0.762162	0.447051	0.998469	-0.083506	0.109565	-0.298253	0.131241
chr17:39910256	chr17:39910256	MED24	-0.443255	0.658162	0.998469	-0.0264287	0.0596242	-0.143292	0.0904347
chr17:39910256	chr17:39910256	MIEN1	0.231158	0.817478	0.998469	0.0123112	0.0532587	-0.0920759	0.116698
chr17:39910256	chr17:39910256	MSL1	-0.679137	0.498003	0.998469	-0.0847762	0.124829	-0.329442	0.159889
chr17:39910256	chr17:39910256	NEUROD2	0.583865	0.560108	0.998469	0.154995	0.265463	-0.365313	0.675303
chr17:39910256	chr17:39910256	NR1D1	-0.851378	0.395793	0.998469	-0.180754	0.212308	-0.596877	0.235369
chr17:39910256	chr17:39910256	ORMDL3	1.57537	0.117086	0.895617	0.100402	0.0637325	-0.0245134	0.225318
chr17:39910256	chr17:39910256	PGAP3	1.74145	0.0834691	0.797369	0.144046	0.0827164	-0.0180779	0.30617
chr17:39910256	chr17:39910256	PPP1R1B	1.6116	0.108961	0.868435	0.630631	0.391308	-0.136332	1.39759
chr17:39910256	chr17:39910256	PSMD3	0.969548	0.333691	0.998469	0.0533864	0.0550632	-0.0545374	0.16131
chr17:39910256	chr17:39910256	RAPGEFL1	0.674993	0.500625	0.998469	0.0903811	0.133899	-0.172061	0.352824
chr17:39910256	chr17:39910256	RARA	0.0229946	0.981682	0.998469	0.00381267	0.165807	-0.32117	0.328795
chr17:39910256	chr17:39910256	STARD3	0.239528	0.810994	0.998469	0.0172344	0.0719516	-0.123791	0.15826
chr17:39910256	chr17:39910256	TCAP	-1.84777	0.0664255	0.726707	-0.421232	0.227967	-0.868047	0.025584
chr17:39910256	chr17:39910256	THRA	-1.72001	0.0873058	0.810142	-0.215743	0.125431	-0.461588	0.0301024
chr17:39910256	chr17:39910256	TOP2A	0.902521	0.368096	0.998469	0.22146	0.24538	-0.259484	0.702404
chr17:39910256	chr17:39910256	WIPF2	0.238976	0.81142	0.998469	0.0177239	0.0741657	-0.127641	0.163089
rs4795400	chr17:39910767	CASC3	-0.611788	0.54152	0.998469	-0.0341455	0.0558125	-0.143538	0.0752471
rs4795400	chr17:39910767	CDC6	-0.0482137	0.961604	0.998469	-0.012638	0.262125	-0.526403	0.501127
rs4795400	chr17:39910767	CDK12	0.240548	0.810204	0.998469	0.0164494	0.068383	-0.117581	0.15048
rs4795400	chr17:39910767	CSF3	-1.10642	0.270157	0.990265	-0.369648	0.334095	-1.02447	0.285178
rs4795400	chr17:39910767	ERBB2	-1.44926	0.149164	0.922393	-0.0827519	0.0570996	-0.194667	0.0291633
rs4795400	chr17:39910767	GJD3	-1.16933	0.243957	0.987976	-0.170409	0.145732	-0.456043	0.115226
rs4795400	chr17:39910767	GRB7	-0.566584	0.571767	0.998469	-0.0568389	0.100319	-0.253463	0.139785
rs4795400	chr17:39910767	GSDMA	-1.49279	0.137402	0.916586	-0.417393	0.279606	-0.965421	0.130635
rs4795400	chr17:39910767	GSDMB	-5.21391	5.47344e-07	0.000106135	-0.432701	0.0829897	-0.595361	-0.270041
rs4795400	chr17:39910767	IKZF3	-0.405938	0.685314	0.998469	-0.0755759	0.186176	-0.440481	0.289329
rs4795400	chr17:39910767	MED1	-0.107799	0.914286	0.998469	-0.00832936	0.0772678	-0.159774	0.143115
rs4795400	chr17:39910767	MED24	-0.210526	0.833517	0.998469	-0.00884114	0.0419955	-0.0911523	0.07347
rs4795400	chr17:39910767	MIEN1	-0.732142	0.46512	0.998469	-0.0274115	0.0374401	-0.100794	0.0459711
rs4795400	chr17:39910767	MSL1	-1.20542	0.229768	0.987976	-0.105618	0.0876192	-0.277351	0.0661159
rs4795400	chr17:39910767	NEUROD2	-0.594283	0.553137	0.998469	-0.111061	0.186882	-0.477351	0.255229
rs4795400	chr17:39910767	NR1D1	-0.93298	0.352194	0.998469	-0.139389	0.149402	-0.432216	0.153439
rs4795400	chr17:39910767	ORMDL3	-0.416267	0.677755	0.998469	-0.0188073	0.0451809	-0.107362	0.0697472
rs4795400	chr17:39910767	PGAP3	-3.73566	0.000257585	0.0274715	-0.210797	0.0564282	-0.321396	-0.100198
rs4795400	chr17:39910767	PPP1R1B	0.553687	0.580543	0.998469	0.153586	0.277388	-0.390094	0.697266
rs4795400	chr17:39910767	PSMD3	-0.85132	0.395826	0.998469	-0.033023	0.0387903	-0.109052	0.0430061
rs4795400	chr17:39910767	RAPGEFL1	-0.835694	0.404536	0.998469	-0.0787204	0.0941977	-0.263348	0.105907
rs4795400	chr17:39910767	RARA	-1.74538	0.08278	0.796649	-0.201884	0.115668	-0.428593	0.0248244
rs4795400	chr17:39910767	STARD3	-0.478218	0.633128	0.998469	-0.0242115	0.0506286	-0.123443	0.0750205
rs4795400	chr17:39910767	TCAP	-0.998288	0.319601	0.998469	-0.16138	0.161656	-0.478226	0.155467
rs4795400	chr17:39910767	THRA	1.83932	0.0676651	0.728937	0.162217	0.0881938	-0.0106431	0.335076
rs4795400	chr17:39910767	TOP2A	-0.0880307	0.929959	0.998469	-0.0152445	0.173172	-0.354662	0.324173
rs4795400	chr17:39910767	WIPF2	0.258892	0.796041	0.998469	0.0135173	0.052212	-0.0888183	0.115853
chr17:39910837	chr17:39910837	CASC3	-0.794838	0.427849	0.998469	-0.068887	0.086668	-0.238756	0.100982
chr17:39910837	chr17:39910837	CDC6	-2.1005	0.0372047	0.554949	-0.844442	0.402019	-1.6324	-0.0564856
chr17:39910837	chr17:39910837	CDK12	0.293885	0.769215	0.998469	0.0312286	0.106261	-0.177044	0.239501
chr17:39910837	chr17:39910837	CSF3	-0.689853	0.491256	0.998469	-0.35898	0.520372	-1.37891	0.660949
chr17:39910837	chr17:39910837	ERBB2	0.246682	0.805461	0.998469	0.0220243	0.0892822	-0.152969	0.197017
chr17:39910837	chr17:39910837	GJD3	1.30639	0.193237	0.972286	0.295564	0.226244	-0.147875	0.739002
chr17:39910837	chr17:39910837	GRB7	-0.00279554	0.997773	0.998469	-0.000436248	0.156051	-0.306297	0.305425
chr17:39910837	chr17:39910837	GSDMA	-0.634978	0.526323	0.998469	-0.27743	0.436912	-1.13378	0.578919
chr17:39910837	chr17:39910837	GSDMB	0.0454015	0.963842	0.998469	0.00631937	0.139189	-0.26649	0.279129
chr17:39910837	chr17:39910837	IKZF3	0.131486	0.895551	0.998469	0.0380593	0.289456	-0.529274	0.605393
chr17:39910837	chr17:39910837	MED1	0.0384554	0.969371	0.998469	0.00461778	0.120082	-0.230742	0.239978
chr17:39910837	chr17:39910837	MED24	1.30297	0.194401	0.972286	0.084613	0.0649386	-0.0426666	0.211893
chr17:39910837	chr17:39910837	MIEN1	1.78632	0.0758835	0.760383	0.103111	0.0577227	-0.0100252	0.216248
chr17:39910837	chr17:39910837	MSL1	1.73418	0.0847537	0.79991	0.235039	0.135533	-0.030606	0.500684
chr17:39910837	chr17:39910837	NEUROD2	0.541644	0.588795	0.998469	0.157335	0.290477	-0.412	0.72667
chr17:39910837	chr17:39910837	NR1D1	-0.0928348	0.926147	0.998469	-0.0216104	0.232783	-0.477865	0.434644
chr17:39910837	chr17:39910837	ORMDL3	-0.77423	0.439903	0.998469	-0.0542913	0.0701229	-0.191732	0.0831496
chr17:39910837	chr17:39910837	PGAP3	-1.16289	0.246552	0.987976	-0.105769	0.0909534	-0.284038	0.0724996
chr17:39910837	chr17:39910837	PPP1R1B	-0.185091	0.853385	0.998469	-0.0798537	0.43143	-0.925456	0.765748
chr17:39910837	chr17:39910837	PSMD3	-1.17003	0.243675	0.987976	-0.0703954	0.0601652	-0.188319	0.0475285
chr17:39910837	chr17:39910837	RAPGEFL1	0.0541028	0.956919	0.998469	0.00793666	0.146696	-0.279588	0.295461
chr17:39910837	chr17:39910837	RARA	0.537969	0.591323	0.998469	0.0975048	0.181246	-0.257738	0.452747
chr17:39910837	chr17:39910837	STARD3	-2.39727	0.0176352	0.362588	-0.185542	0.0773974	-0.337241	-0.0338433
chr17:39910837	chr17:39910837	TCAP	1.11914	0.264706	0.988391	0.280937	0.251028	-0.211079	0.772952
chr17:39910837	chr17:39910837	THRA	-0.896957	0.371049	0.998469	-0.123887	0.138119	-0.3946	0.146826
chr17:39910837	chr17:39910837	TOP2A	-0.574273	0.566565	0.998469	-0.154397	0.268856	-0.681354	0.37256
chr17:39910837	chr17:39910837	WIPF2	0.291942	0.770698	0.998469	0.0236869	0.0811356	-0.135339	0.182713
rs4795401	chr17:39911280	CASC3	-0.486017	0.6276	0.998469	-0.0219137	0.0450883	-0.110287	0.0664594
rs4795401	chr17:39911280	CDC6	-0.763174	0.446449	0.998469	-0.161258	0.211299	-0.575404	0.252888
rs4795401	chr17:39911280	CDK12	0.105185	0.916357	0.998469	0.00580919	0.0552282	-0.102438	0.114056
rs4795401	chr17:39911280	CSF3	-0.71404	0.476211	0.998469	-0.193054	0.270368	-0.722976	0.336868
rs4795401	chr17:39911280	ERBB2	-0.988159	0.324522	0.998469	-0.0457169	0.0462647	-0.136396	0.044962
rs4795401	chr17:39911280	GJD3	-0.245853	0.806101	0.998469	-0.0290465	0.118146	-0.260612	0.202519
rs4795401	chr17:39911280	GRB7	-0.871169	0.384928	0.998469	-0.0704791	0.0809017	-0.229046	0.0880883
rs4795401	chr17:39911280	GSDMA	-1.15768	0.248667	0.987976	-0.262086	0.226388	-0.705807	0.181635
rs4795401	chr17:39911280	GSDMB	-3.33509	0.00105325	0.0576044	-0.233472	0.0700047	-0.370681	-0.0962624
rs4795401	chr17:39911280	IKZF3	-0.0630949	0.949767	0.998469	-0.00949031	0.150413	-0.304301	0.28532
rs4795401	chr17:39911280	MED1	0.166989	0.867583	0.998469	0.0104187	0.0623919	-0.111869	0.132707
rs4795401	chr17:39911280	MED24	1.31401	0.190668	0.972286	0.0443353	0.0337405	-0.0217961	0.110467
rs4795401	chr17:39911280	MIEN1	-0.238797	0.811559	0.998469	-0.00723013	0.0302773	-0.0665737	0.0521134
rs4795401	chr17:39911280	MSL1	-0.353572	0.724111	0.998469	-0.025117	0.0710379	-0.164351	0.114117
rs4795401	chr17:39911280	NEUROD2	0.102675	0.918345	0.998469	0.0155109	0.151067	-0.280581	0.311603
rs4795401	chr17:39911280	NR1D1	-0.718771	0.473299	0.998469	-0.0868082	0.120773	-0.323524	0.149907
rs4795401	chr17:39911280	ORMDL3	-0.729286	0.466861	0.998469	-0.0265786	0.0364448	-0.0980104	0.0448531
rs4795401	chr17:39911280	PGAP3	-3.36281	0.000959101	0.0569768	-0.154378	0.0459074	-0.244357	-0.0643994
rs4795401	chr17:39911280	PPP1R1B	0.609578	0.54298	0.998469	0.136516	0.223951	-0.302428	0.57546
rs4795401	chr17:39911280	PSMD3	-1.24398	0.215272	0.987976	-0.0388697	0.0312463	-0.100113	0.0223731
rs4795401	chr17:39911280	RAPGEFL1	-0.0956514	0.923914	0.998469	-0.00729101	0.0762248	-0.156692	0.14211
rs4795401	chr17:39911280	RARA	-1.82035	0.0705184	0.740965	-0.169892	0.0933293	-0.352817	0.0130339
rs4795401	chr17:39911280	STARD3	-1.81649	0.07111	0.741906	-0.0735836	0.0405087	-0.152981	0.00581337
rs4795401	chr17:39911280	TCAP	-0.199805	0.841879	0.998469	-0.0261581	0.130918	-0.282757	0.230441
rs4795401	chr17:39911280	THRA	0.781601	0.435569	0.998469	0.0561279	0.0718115	-0.0846226	0.196878
rs4795401	chr17:39911280	TOP2A	0.362116	0.717729	0.998469	0.0506191	0.139787	-0.223363	0.324602
rs4795401	chr17:39911280	WIPF2	0.287329	0.774221	0.998469	0.0121138	0.0421601	-0.0705199	0.0947475
chr17:39911682	chr17:39911682	CASC3	-1.37331	0.17152	0.947805	-0.108355	0.078901	-0.263001	0.0462907
chr17:39911682	chr17:39911682	CDC6	1.38149	0.168996	0.94622	0.511315	0.370119	-0.214117	1.23675
chr17:39911682	chr17:39911682	CDK12	0.941114	0.348022	0.998469	0.0911656	0.0968698	-0.0986993	0.28103
chr17:39911682	chr17:39911682	CSF3	1.23456	0.218749	0.987976	0.585218	0.474029	-0.343879	1.51431
chr17:39911682	chr17:39911682	ERBB2	0.392999	0.694827	0.998469	0.032055	0.0815649	-0.127812	0.191922
chr17:39911682	chr17:39911682	GJD3	1.09556	0.274869	0.991261	0.226848	0.207062	-0.178993	0.632689
chr17:39911682	chr17:39911682	GRB7	1.07271	0.284966	0.991261	0.152442	0.142109	-0.126091	0.430975
chr17:39911682	chr17:39911682	GSDMA	0.803349	0.422929	0.998469	0.320511	0.398969	-0.461467	1.10249
chr17:39911682	chr17:39911682	GSDMB	0.94444	0.346326	0.998469	0.119804	0.126852	-0.128826	0.368434
chr17:39911682	chr17:39911682	IKZF3	-0.03657	0.970872	0.998469	-0.00967366	0.264524	-0.528141	0.508794
chr17:39911682	chr17:39911682	MED1	0.985719	0.325714	0.998469	0.10785	0.109412	-0.106598	0.322297
chr17:39911682	chr17:39911682	MED24	-0.680115	0.497385	0.998469	-0.04051	0.0595635	-0.157254	0.0762344
chr17:39911682	chr17:39911682	MIEN1	-0.192531	0.847563	0.998469	-0.0102522	0.05325	-0.114622	0.0941177
chr17:39911682	chr17:39911682	MSL1	1.49058	0.137981	0.916586	0.185046	0.124144	-0.0582758	0.428368
chr17:39911682	chr17:39911682	NEUROD2	1.30141	0.194933	0.972286	0.343997	0.264327	-0.174084	0.862079
chr17:39911682	chr17:39911682	NR1D1	-0.305416	0.760434	0.998469	-0.0649523	0.212668	-0.481781	0.351877
chr17:39911682	chr17:39911682	ORMDL3	-0.0778352	0.938053	0.998469	-0.00499663	0.064195	-0.130819	0.120826
chr17:39911682	chr17:39911682	PGAP3	0.286373	0.774952	0.998469	0.0238934	0.0834344	-0.139638	0.187425
chr17:39911682	chr17:39911682	PPP1R1B	-1.87372	0.0627372	0.717102	-0.731054	0.390162	-1.49577	0.0336632
chr17:39911682	chr17:39911682	PSMD3	1.6453	0.101812	0.842124	0.0900975	0.0547606	-0.0172333	0.197428
chr17:39911682	chr17:39911682	RAPGEFL1	0.818373	0.414325	0.998469	0.109485	0.133784	-0.152732	0.371702
chr17:39911682	chr17:39911682	RARA	0.882724	0.37867	0.998469	0.145987	0.165382	-0.178162	0.470136
chr17:39911682	chr17:39911682	STARD3	1.68407	0.0940585	0.822241	0.120139	0.0713382	-0.0196842	0.259962
chr17:39911682	chr17:39911682	TCAP	-0.667783	0.505205	0.998469	-0.153559	0.229954	-0.604269	0.29715
chr17:39911682	chr17:39911682	THRA	-0.204756	0.838015	0.998469	-0.0259032	0.126508	-0.273858	0.222052
chr17:39911682	chr17:39911682	TOP2A	-0.378931	0.705226	0.998469	-0.0931508	0.245825	-0.574968	0.388666
chr17:39911682	chr17:39911682	WIPF2	-0.0623414	0.950366	0.998469	-0.00462335	0.0741618	-0.149981	0.140734
rs869402	chr17:39911790	CASC3	0.0984748	0.921675	0.998469	0.00482045	0.0489511	-0.0911238	0.100765
rs869402	chr17:39911790	CDC6	-0.328771	0.742746	0.998469	-0.0754769	0.229573	-0.525441	0.374487
rs869402	chr17:39911790	CDK12	0.0245168	0.98047	0.998469	0.00146906	0.0599205	-0.115975	0.118913
rs869402	chr17:39911790	CSF3	0.325447	0.745255	0.998469	0.0955801	0.293689	-0.48005	0.67121
rs869402	chr17:39911790	ERBB2	1.27413	0.204409	0.987976	0.0638292	0.0500963	-0.0343596	0.162018
rs869402	chr17:39911790	GJD3	0.870513	0.385285	0.998469	0.111347	0.12791	-0.139356	0.36205
rs869402	chr17:39911790	GRB7	0.975163	0.330907	0.998469	0.085543	0.0877217	-0.0863916	0.257478
rs869402	chr17:39911790	GSDMA	0.984515	0.326304	0.998469	0.242082	0.245889	-0.239861	0.724025
rs869402	chr17:39911790	GSDMB	3.68528	0.000309501	0.0314365	0.277964	0.0754254	0.13013	0.425797
rs869402	chr17:39911790	IKZF3	0.0216679	0.982739	0.998469	0.00353597	0.163189	-0.316315	0.323387
rs869402	chr17:39911790	MED1	-0.0146761	0.988308	0.998469	-0.000993518	0.0676963	-0.133678	0.131691
rs869402	chr17:39911790	MED24	-0.779506	0.436798	0.998469	-0.0286308	0.0367295	-0.100621	0.0433589
rs869402	chr17:39911790	MIEN1	1.13243	0.259098	0.987976	0.0370614	0.0327274	-0.0270844	0.101207
rs869402	chr17:39911790	MSL1	1.50117	0.135223	0.916586	0.114958	0.076579	-0.0351368	0.265053
rs869402	chr17:39911790	NEUROD2	0.059735	0.952439	0.998469	0.0097906	0.1639	-0.311454	0.331035
rs869402	chr17:39911790	NR1D1	0.791091	0.430026	0.998469	0.103623	0.130987	-0.153112	0.360357
rs869402	chr17:39911790	ORMDL3	0.241904	0.809155	0.998469	0.00957856	0.0395966	-0.0680307	0.0871879
rs869402	chr17:39911790	PGAP3	3.07505	0.00246393	0.107256	0.153968	0.05007	0.0558303	0.252105
rs869402	chr17:39911790	PPP1R1B	-0.710535	0.478375	0.998469	-0.17257	0.242873	-0.6486	0.303461
rs869402	chr17:39911790	PSMD3	0.707839	0.480044	0.998469	0.0240715	0.034007	-0.0425823	0.0907253
rs869402	chr17:39911790	RAPGEFL1	0.271557	0.786302	0.998469	0.022453	0.0826823	-0.139604	0.18451
rs869402	chr17:39911790	RARA	2.46232	0.0148321	0.351521	0.247312	0.100439	0.0504519	0.444171
rs869402	chr17:39911790	STARD3	0.71703	0.474369	0.998469	0.0317768	0.0443172	-0.055085	0.118639
rs869402	chr17:39911790	TCAP	0.717607	0.474014	0.998469	0.10178	0.141832	-0.176212	0.379771
rs869402	chr17:39911790	THRA	-1.4504	0.148845	0.922393	-0.112495	0.0775615	-0.264516	0.0395252
rs869402	chr17:39911790	TOP2A	-0.711993	0.477474	0.998469	-0.107857	0.151486	-0.404771	0.189056
rs869402	chr17:39911790	WIPF2	-0.158452	0.874294	0.998469	-0.00724897	0.0457486	-0.0969162	0.0824183
chr17:39912120	chr17:39912120	CASC3	-0.542693	0.588073	0.998469	-0.0421308	0.0776328	-0.194291	0.11003
chr17:39912120	chr17:39912120	CDC6	0.340559	0.733869	0.998469	0.124097	0.364391	-0.59011	0.838304
chr17:39912120	chr17:39912120	CDK12	-1.24436	0.21513	0.987976	-0.117802	0.0946684	-0.303352	0.0677481
chr17:39912120	chr17:39912120	CSF3	0.467742	0.640586	0.998469	0.217973	0.466011	-0.695408	1.13135
chr17:39912120	chr17:39912120	ERBB2	0.169523	0.865593	0.998469	0.013545	0.0799008	-0.143061	0.170151
chr17:39912120	chr17:39912120	GJD3	-1.00621	0.315786	0.998469	-0.204135	0.202875	-0.601769	0.193499
chr17:39912120	chr17:39912120	GRB7	0.441325	0.659556	0.998469	0.0615906	0.139558	-0.211944	0.335125
chr17:39912120	chr17:39912120	GSDMA	-1.65561	0.0997014	0.842124	-0.642761	0.388232	-1.40369	0.118174
chr17:39912120	chr17:39912120	GSDMB	1.36619	0.173739	0.951075	0.169207	0.123854	-0.0735458	0.41196
chr17:39912120	chr17:39912120	IKZF3	-1.33653	0.183216	0.972286	-0.344342	0.257639	-0.849314	0.16063
chr17:39912120	chr17:39912120	MED1	-0.390475	0.696689	0.998469	-0.0419387	0.107404	-0.252451	0.168574
chr17:39912120	chr17:39912120	MED24	-0.600278	0.549145	0.998469	-0.0350226	0.058344	-0.149377	0.0793317
chr17:39912120	chr17:39912120	MIEN1	-0.11472	0.908806	0.998469	-0.00598236	0.0521475	-0.108191	0.0962266
chr17:39912120	chr17:39912120	MSL1	-0.673879	0.501331	0.998469	-0.0823564	0.122212	-0.321893	0.15718
chr17:39912120	chr17:39912120	NEUROD2	0.842848	0.400534	0.998469	0.218806	0.259603	-0.290016	0.727627
chr17:39912120	chr17:39912120	NR1D1	-0.888356	0.375642	0.998469	-0.184611	0.207812	-0.591923	0.222701
chr17:39912120	chr17:39912120	ORMDL3	1.49316	0.137306	0.916586	0.0932357	0.0624421	-0.0291508	0.215622
chr17:39912120	chr17:39912120	PGAP3	1.83641	0.0680967	0.729901	0.148563	0.0808988	-0.00999839	0.307125
chr17:39912120	chr17:39912120	PPP1R1B	1.57894	0.116264	0.895617	0.605076	0.383215	-0.146026	1.35618
chr17:39912120	chr17:39912120	PSMD3	0.86076	0.390619	0.998469	0.0464295	0.0539401	-0.059293	0.152152
chr17:39912120	chr17:39912120	RAPGEFL1	0.865896	0.387804	0.998469	0.113409	0.130973	-0.143298	0.370116
chr17:39912120	chr17:39912120	RARA	-0.0730477	0.941857	0.998469	-0.0118575	0.162326	-0.330016	0.306301
chr17:39912120	chr17:39912120	STARD3	0.396343	0.692364	0.998469	0.0279106	0.0704204	-0.110113	0.165935
chr17:39912120	chr17:39912120	TCAP	-1.792	0.0749657	0.760383	-0.400185	0.223318	-0.837889	0.0375178
chr17:39912120	chr17:39912120	THRA	-1.78456	0.0761704	0.760383	-0.218995	0.122717	-0.459519	0.0215295
chr17:39912120	chr17:39912120	TOP2A	1.16594	0.245323	0.987976	0.279634	0.239837	-0.190446	0.749714
chr17:39912120	chr17:39912120	WIPF2	0.422739	0.673036	0.998469	0.0306835	0.0725827	-0.111578	0.172946
chr17:39912129	chr17:39912129	CASC3	0.323204	0.74695	0.998469	0.0198389	0.061382	-0.10047	0.140148
chr17:39912129	chr17:39912129	CDC6	-0.73096	0.465841	0.998469	-0.210212	0.287584	-0.773876	0.353452
chr17:39912129	chr17:39912129	CDK12	0.23093	0.817655	0.998469	0.0173536	0.0751465	-0.129934	0.164641
chr17:39912129	chr17:39912129	CSF3	-0.841307	0.401394	0.998469	-0.309353	0.367705	-1.03006	0.411349
chr17:39912129	chr17:39912129	ERBB2	0.02724	0.978301	0.998469	0.00172005	0.0631442	-0.122043	0.125483
chr17:39912129	chr17:39912129	GJD3	0.656167	0.51263	0.998469	0.105378	0.160596	-0.209391	0.420147
chr17:39912129	chr17:39912129	GRB7	0.671809	0.502645	0.998469	0.0740304	0.110196	-0.141953	0.290014
chr17:39912129	chr17:39912129	GSDMA	1.20848	0.228592	0.987976	0.372169	0.307965	-0.231441	0.97578
chr17:39912129	chr17:39912129	GSDMB	0.769214	0.442866	0.998469	0.075573	0.098247	-0.116991	0.268137
chr17:39912129	chr17:39912129	IKZF3	-0.762184	0.447039	0.998469	-0.155737	0.20433	-0.556224	0.24475
chr17:39912129	chr17:39912129	MED1	-0.178713	0.858382	0.998469	-0.0151734	0.0849036	-0.181584	0.151238
chr17:39912129	chr17:39912129	MED24	-0.231339	0.817338	0.998469	-0.0106757	0.0461472	-0.101124	0.0797729
chr17:39912129	chr17:39912129	MIEN1	1.82535	0.069756	0.736582	0.0744735	0.0407995	-0.00549354	0.15444
chr17:39912129	chr17:39912129	MSL1	1.84261	0.06718	0.728937	0.176388	0.0957271	-0.0112371	0.364013
chr17:39912129	chr17:39912129	NEUROD2	-0.765779	0.444902	0.998469	-0.157152	0.205219	-0.559381	0.245077
chr17:39912129	chr17:39912129	NR1D1	-0.377964	0.705943	0.998469	-0.0621892	0.164537	-0.384683	0.260304
chr17:39912129	chr17:39912129	ORMDL3	0.35361	0.724083	0.998469	0.0175589	0.0496561	-0.0797672	0.114885
chr17:39912129	chr17:39912129	PGAP3	1.61123	0.109041	0.868435	0.10324	0.0640754	-0.0223475	0.228828
chr17:39912129	chr17:39912129	PPP1R1B	-0.410331	0.682096	0.998469	-0.125129	0.304946	-0.722824	0.472566
chr17:39912129	chr17:39912129	PSMD3	-0.803349	0.422929	0.998469	-0.034252	0.0426366	-0.11782	0.0493156
chr17:39912129	chr17:39912129	RAPGEFL1	0.0443697	0.964663	0.998469	0.00460252	0.103731	-0.198711	0.207916
chr17:39912129	chr17:39912129	RARA	1.72765	0.0859227	0.807371	0.219635	0.12713	-0.029539	0.468809
chr17:39912129	chr17:39912129	STARD3	0.922584	0.357571	0.998469	0.0512318	0.0555308	-0.0576085	0.160072
chr17:39912129	chr17:39912129	TCAP	-0.0043714	0.996517	0.998469	-0.000778889	0.178178	-0.350008	0.348451
chr17:39912129	chr17:39912129	THRA	-1.1182	0.265105	0.988391	-0.109064	0.097535	-0.300233	0.0821046
chr17:39912129	chr17:39912129	TOP2A	-1.02296	0.307825	0.998469	-0.194056	0.189701	-0.565871	0.177758
chr17:39912129	chr17:39912129	WIPF2	-0.677199	0.499228	0.998469	-0.0388085	0.0573074	-0.151131	0.073514
chr17:39912261	chr17:39912261	CASC3	-0.225277	0.822042	0.998469	-0.0103874	0.0461095	-0.100762	0.0799871
chr17:39912261	chr17:39912261	CDC6	0.670045	0.503766	0.998469	0.144763	0.21605	-0.278695	0.568222
chr17:39912261	chr17:39912261	CDK12	-0.37521	0.707986	0.998469	-0.0211712	0.0564251	-0.131764	0.089422
chr17:39912261	chr17:39912261	CSF3	1.09644	0.274484	0.991261	0.302355	0.27576	-0.238135	0.842844
chr17:39912261	chr17:39912261	ERBB2	-0.390947	0.696341	0.998469	-0.0185323	0.0474037	-0.111444	0.0743789
chr17:39912261	chr17:39912261	GJD3	1.01704	0.310622	0.998469	0.122451	0.120399	-0.113531	0.358433
chr17:39912261	chr17:39912261	GRB7	-0.433367	0.665314	0.998469	-0.0358959	0.0828303	-0.198243	0.126451
chr17:39912261	chr17:39912261	GSDMA	1.02477	0.306972	0.998469	0.237324	0.231587	-0.216587	0.691236
chr17:39912261	chr17:39912261	GSDMB	2.81722	0.00543586	0.190077	0.20342	0.072206	0.0618967	0.344944
chr17:39912261	chr17:39912261	IKZF3	-0.454893	0.649784	0.998469	-0.0698894	0.153639	-0.371022	0.231243
chr17:39912261	chr17:39912261	MED1	-0.786176	0.432892	0.998469	-0.0500443	0.0636553	-0.174809	0.0747201
chr17:39912261	chr17:39912261	MED24	-0.899318	0.369794	0.998469	-0.031099	0.0345806	-0.0988769	0.036679
chr17:39912261	chr17:39912261	MIEN1	0.822432	0.412018	0.998469	0.0254031	0.0308877	-0.0351369	0.085943
chr17:39912261	chr17:39912261	MSL1	-0.121923	0.903108	0.998469	-0.00885529	0.0726301	-0.15121	0.1335
chr17:39912261	chr17:39912261	NEUROD2	0.268445	0.788692	0.998469	0.0414406	0.154373	-0.26113	0.344012
chr17:39912261	chr17:39912261	NR1D1	0.790104	0.430601	0.998469	0.097498	0.123399	-0.144364	0.33936
chr17:39912261	chr17:39912261	ORMDL3	-0.443342	0.658099	0.998469	-0.0165309	0.037287	-0.0896134	0.0565516
chr17:39912261	chr17:39912261	PGAP3	2.36995	0.018946	0.382537	0.113039	0.047697	0.0195532	0.206525
chr17:39912261	chr17:39912261	PPP1R1B	-0.470744	0.638445	0.998469	-0.107799	0.228998	-0.556636	0.341037
chr17:39912261	chr17:39912261	PSMD3	1.14624	0.253355	0.987976	0.0366321	0.0319585	-0.0260065	0.0992707
chr17:39912261	chr17:39912261	RAPGEFL1	0.585952	0.558709	0.998469	0.0456038	0.0778286	-0.10694	0.198148
chr17:39912261	chr17:39912261	RARA	0.873823	0.383485	0.998469	0.0839922	0.0961203	-0.104404	0.272388
chr17:39912261	chr17:39912261	STARD3	0.907653	0.365385	0.998469	0.0378589	0.0417107	-0.0438942	0.119612
chr17:39912261	chr17:39912261	TCAP	-0.52575	0.599768	0.998469	-0.0702989	0.133712	-0.332374	0.191776
chr17:39912261	chr17:39912261	THRA	-0.378281	0.705708	0.998469	-0.0278039	0.0735005	-0.171865	0.116257
chr17:39912261	chr17:39912261	TOP2A	0.0900428	0.928362	0.998469	0.0128694	0.142926	-0.267265	0.293004
chr17:39912261	chr17:39912261	WIPF2	-0.0409456	0.967389	0.998469	-0.0017648	0.0431012	-0.0862432	0.0827136
rs921650	chr17:39912823	CASC3	-0.0574322	0.95427	0.998469	-0.00271047	0.0471943	-0.0952113	0.0897904
rs921650	chr17:39912823	CDC6	0.0127773	0.989821	0.998469	0.00282893	0.221402	-0.431119	0.436777
rs921650	chr17:39912823	CDK12	0.0623766	0.950338	0.998469	0.00360339	0.0577683	-0.109623	0.116829
rs921650	chr17:39912823	CSF3	0.367435	0.713766	0.998469	0.104027	0.283118	-0.450884	0.658939
rs921650	chr17:39912823	ERBB2	0.938649	0.349283	0.998469	0.0454357	0.0484054	-0.0494389	0.14031
rs921650	chr17:39912823	GJD3	0.92539	0.356114	0.998469	0.114082	0.12328	-0.127547	0.355711
rs921650	chr17:39912823	GRB7	0.982638	0.327224	0.998469	0.0830998	0.0845681	-0.0826536	0.248853
rs921650	chr17:39912823	GSDMA	1.26361	0.208152	0.987976	0.298987	0.236613	-0.164775	0.762749
rs921650	chr17:39912823	GSDMB	3.42006	0.000789041	0.0561822	0.250019	0.0731038	0.106736	0.393303
rs921650	chr17:39912823	IKZF3	0.295793	0.76776	0.998469	0.0465247	0.157288	-0.26176	0.354809
rs921650	chr17:39912823	MED1	-0.0047554	0.996212	0.998469	-0.000310364	0.0652655	-0.128231	0.12761
rs921650	chr17:39912823	MED24	-0.750819	0.453831	0.998469	-0.0265905	0.0354153	-0.0960045	0.0428235
rs921650	chr17:39912823	MIEN1	1.45001	0.148955	0.922393	0.0456385	0.0314747	-0.0160519	0.107329
rs921650	chr17:39912823	MSL1	1.70425	0.0902177	0.810142	0.125579	0.0736859	-0.0188455	0.270003
rs921650	chr17:39912823	NEUROD2	0.0715585	0.94304	0.998469	0.0113073	0.158014	-0.298401	0.321015
rs921650	chr17:39912823	NR1D1	0.836193	0.404255	0.998469	0.105574	0.126255	-0.141887	0.353035
rs921650	chr17:39912823	ORMDL3	0.187864	0.851214	0.998469	0.00717216	0.0381774	-0.0676556	0.0819999
rs921650	chr17:39912823	PGAP3	2.55464	0.0115341	0.322749	0.124366	0.0486826	0.0289485	0.219784
rs921650	chr17:39912823	PPP1R1B	-0.802626	0.423346	0.998469	-0.187857	0.234053	-0.646601	0.270887
rs921650	chr17:39912823	PSMD3	0.440008	0.660507	0.998469	0.0144395	0.0328164	-0.0498807	0.0787596
rs921650	chr17:39912823	RAPGEFL1	-0.0461291	0.963263	0.998469	-0.0036779	0.0797306	-0.15995	0.152594
rs921650	chr17:39912823	RARA	2.39633	0.0176789	0.362588	0.232259	0.0969229	0.0422901	0.422228
rs921650	chr17:39912823	STARD3	0.738949	0.460988	0.998469	0.0315692	0.0427218	-0.0521655	0.115304
rs921650	chr17:39912823	TCAP	0.541262	0.589057	0.998469	0.0740615	0.136831	-0.194128	0.342251
rs921650	chr17:39912823	THRA	-1.20926	0.228291	0.987976	-0.0905985	0.0749203	-0.237442	0.0562453
rs921650	chr17:39912823	TOP2A	-0.544663	0.586721	0.998469	-0.0795969	0.14614	-0.366031	0.206837
rs921650	chr17:39912823	WIPF2	-0.25071	0.80235	0.998469	-0.0110565	0.0441008	-0.0974941	0.0753811
rs921649	chr17:39913021	CASC3	-0.0574322	0.95427	0.998469	-0.00271047	0.0471943	-0.0952113	0.0897904
rs921649	chr17:39913021	CDC6	0.0127773	0.989821	0.998469	0.00282893	0.221402	-0.431119	0.436777
rs921649	chr17:39913021	CDK12	0.0623766	0.950338	0.998469	0.00360339	0.0577683	-0.109623	0.116829
rs921649	chr17:39913021	CSF3	0.367435	0.713766	0.998469	0.104027	0.283118	-0.450884	0.658939
rs921649	chr17:39913021	ERBB2	0.938649	0.349283	0.998469	0.0454357	0.0484054	-0.0494389	0.14031
rs921649	chr17:39913021	GJD3	0.92539	0.356114	0.998469	0.114082	0.12328	-0.127547	0.355711
rs921649	chr17:39913021	GRB7	0.982638	0.327224	0.998469	0.0830998	0.0845681	-0.0826536	0.248853
rs921649	chr17:39913021	GSDMA	1.26361	0.208152	0.987976	0.298987	0.236613	-0.164775	0.762749
rs921649	chr17:39913021	GSDMB	3.42006	0.000789041	0.0561822	0.250019	0.0731038	0.106736	0.393303
rs921649	chr17:39913021	IKZF3	0.295793	0.76776	0.998469	0.0465247	0.157288	-0.26176	0.354809
rs921649	chr17:39913021	MED1	-0.0047554	0.996212	0.998469	-0.000310364	0.0652655	-0.128231	0.12761
rs921649	chr17:39913021	MED24	-0.750819	0.453831	0.998469	-0.0265905	0.0354153	-0.0960045	0.0428235
rs921649	chr17:39913021	MIEN1	1.45001	0.148955	0.922393	0.0456385	0.0314747	-0.0160519	0.107329
rs921649	chr17:39913021	MSL1	1.70425	0.0902177	0.810142	0.125579	0.0736859	-0.0188455	0.270003
rs921649	chr17:39913021	NEUROD2	0.0715585	0.94304	0.998469	0.0113073	0.158014	-0.298401	0.321015
rs921649	chr17:39913021	NR1D1	0.836193	0.404255	0.998469	0.105574	0.126255	-0.141887	0.353035
rs921649	chr17:39913021	ORMDL3	0.187864	0.851214	0.998469	0.00717216	0.0381774	-0.0676556	0.0819999
rs921649	chr17:39913021	PGAP3	2.55464	0.0115341	0.322749	0.124366	0.0486826	0.0289485	0.219784
rs921649	chr17:39913021	PPP1R1B	-0.802626	0.423346	0.998469	-0.187857	0.234053	-0.646601	0.270887
rs921649	chr17:39913021	PSMD3	0.440008	0.660507	0.998469	0.0144395	0.0328164	-0.0498807	0.0787596
rs921649	chr17:39913021	RAPGEFL1	-0.0461291	0.963263	0.998469	-0.0036779	0.0797306	-0.15995	0.152594
rs921649	chr17:39913021	RARA	2.39633	0.0176789	0.362588	0.232259	0.0969229	0.0422901	0.422228
rs921649	chr17:39913021	STARD3	0.738949	0.460988	0.998469	0.0315692	0.0427218	-0.0521655	0.115304
rs921649	chr17:39913021	TCAP	0.541262	0.589057	0.998469	0.0740615	0.136831	-0.194128	0.342251
rs921649	chr17:39913021	THRA	-1.20926	0.228291	0.987976	-0.0905985	0.0749203	-0.237442	0.0562453
rs921649	chr17:39913021	TOP2A	-0.544663	0.586721	0.998469	-0.0795969	0.14614	-0.366031	0.206837
rs921649	chr17:39913021	WIPF2	-0.25071	0.80235	0.998469	-0.0110565	0.0441008	-0.0974941	0.0753811
chr17:39913391	chr17:39913391	CASC3	-0.704318	0.482228	0.998469	-0.0571857	0.0811931	-0.216324	0.101953
chr17:39913391	chr17:39913391	CDC6	1.86739	0.0636215	0.717102	0.704939	0.377501	-0.0349621	1.44484
chr17:39913391	chr17:39913391	CDK12	0.121598	0.903365	0.998469	0.0121026	0.0995296	-0.182975	0.207181
chr17:39913391	chr17:39913391	CSF3	0.0947588	0.924621	0.998469	0.0462413	0.487989	-0.910217	1.0027
chr17:39913391	chr17:39913391	ERBB2	0.325	0.745593	0.998469	0.0271689	0.0835965	-0.13668	0.191018
chr17:39913391	chr17:39913391	GJD3	1.74461	0.0829143	0.796649	0.36815	0.211021	-0.0454512	0.78175
chr17:39913391	chr17:39913391	GRB7	0.940572	0.348299	0.998469	0.137082	0.145744	-0.148575	0.42274
chr17:39913391	chr17:39913391	GSDMA	0.0417811	0.966724	0.998469	0.0171153	0.409642	-0.785783	0.820014
chr17:39913391	chr17:39913391	GSDMB	0.776102	0.4388	0.998469	0.100976	0.130106	-0.154032	0.355984
chr17:39913391	chr17:39913391	IKZF3	-0.847798	0.397778	0.998469	-0.229317	0.270486	-0.759469	0.300834
chr17:39913391	chr17:39913391	MED1	-0.0466068	0.962883	0.998469	-0.00524091	0.11245	-0.225642	0.21516
chr17:39913391	chr17:39913391	MED24	-0.200761	0.841132	0.998469	-0.0122698	0.0611161	-0.132057	0.107518
chr17:39913391	chr17:39913391	MIEN1	0.266149	0.790457	0.998469	0.0145218	0.0545626	-0.092421	0.121465
chr17:39913391	chr17:39913391	MSL1	1.03079	0.304146	0.998469	0.131592	0.127661	-0.118623	0.381806
chr17:39913391	chr17:39913391	NEUROD2	1.0475	0.296402	0.998469	0.284246	0.271357	-0.247614	0.816105
chr17:39913391	chr17:39913391	NR1D1	-0.0103849	0.991727	0.998469	-0.00226386	0.217994	-0.429533	0.425005
chr17:39913391	chr17:39913391	ORMDL3	0.20422	0.838433	0.998469	0.013433	0.0657772	-0.11549	0.142356
chr17:39913391	chr17:39913391	PGAP3	0.731938	0.465244	0.998469	0.0624949	0.0853827	-0.104855	0.229845
chr17:39913391	chr17:39913391	PPP1R1B	-2.03019	0.0439436	0.608648	-0.810244	0.399098	-1.59248	-0.0280113
chr17:39913391	chr17:39913391	PSMD3	1.31035	0.1919	0.972286	0.0737498	0.0562826	-0.0365642	0.184064
chr17:39913391	chr17:39913391	RAPGEFL1	0.239337	0.811141	0.998469	0.032873	0.13735	-0.236333	0.302079
chr17:39913391	chr17:39913391	RARA	0.766526	0.444458	0.998469	0.129983	0.169574	-0.202383	0.462349
chr17:39913391	chr17:39913391	STARD3	1.03572	0.301848	0.998469	0.0761165	0.0734914	-0.0679266	0.22016
chr17:39913391	chr17:39913391	TCAP	-0.355024	0.723025	0.998469	-0.0837413	0.235875	-0.546056	0.378573
chr17:39913391	chr17:39913391	THRA	0.13575	0.892185	0.998469	0.0175998	0.129649	-0.236512	0.271711
chr17:39913391	chr17:39913391	TOP2A	-0.585046	0.559316	0.998469	-0.147291	0.251759	-0.640739	0.346157
chr17:39913391	chr17:39913391	WIPF2	-0.191778	0.848152	0.998469	-0.0145732	0.0759902	-0.163514	0.134368
chr17:39913429	chr17:39913429	CASC3	-1.56981	0.118374	0.898459	-0.0993662	0.0632981	-0.22343	0.024698
chr17:39913429	chr17:39913429	CDC6	-1.38329	0.168446	0.94622	-0.41144	0.297436	-0.994415	0.171535
chr17:39913429	chr17:39913429	CDK12	0.0799825	0.936348	0.998469	0.00624305	0.0780552	-0.146745	0.159231
chr17:39913429	chr17:39913429	CSF3	1.13427	0.258326	0.987976	0.432405	0.381218	-0.314783	1.17959
chr17:39913429	chr17:39913429	ERBB2	0.112564	0.910513	0.998469	0.00738156	0.0655766	-0.121149	0.135912
chr17:39913429	chr17:39913429	GJD3	1.73992	0.0837368	0.797369	0.287949	0.165495	-0.0364213	0.612319
chr17:39913429	chr17:39913429	GRB7	1.13156	0.25946	0.987976	0.129178	0.114159	-0.0945735	0.35293
chr17:39913429	chr17:39913429	GSDMA	-0.893778	0.372742	0.998469	-0.286435	0.320477	-0.91457	0.341699
chr17:39913429	chr17:39913429	GSDMB	1.98185	0.0491569	0.676462	0.200212	0.101023	0.00220732	0.398216
chr17:39913429	chr17:39913429	IKZF3	1.2135	0.226672	0.987976	0.256825	0.21164	-0.157989	0.671639
chr17:39913429	chr17:39913429	MED1	-0.972102	0.332423	0.998469	-0.0854813	0.0879345	-0.257833	0.0868703
chr17:39913429	chr17:39913429	MED24	-1.43473	0.153257	0.939361	-0.0683478	0.0476381	-0.161719	0.025023
chr17:39913429	chr17:39913429	MIEN1	-0.697747	0.486317	0.998469	-0.0298185	0.0427354	-0.11358	0.0539428
chr17:39913429	chr17:39913429	MSL1	1.32969	0.185457	0.972286	0.132838	0.0999021	-0.0629697	0.328647
chr17:39913429	chr17:39913429	NEUROD2	-0.123248	0.90206	0.998469	-0.0263136	0.2135	-0.444774	0.392147
chr17:39913429	chr17:39913429	NR1D1	0.371352	0.710852	0.998469	0.0634583	0.170884	-0.271475	0.398392
chr17:39913429	chr17:39913429	ORMDL3	0.555668	0.57919	0.998469	0.0286403	0.0515422	-0.0723823	0.129663
chr17:39913429	chr17:39913429	PGAP3	0.188795	0.850486	0.998469	0.0126606	0.0670603	-0.118778	0.144099
chr17:39913429	chr17:39913429	PPP1R1B	-1.90392	0.0586614	0.717102	-0.596768	0.313442	-1.21111	0.0175783
chr17:39913429	chr17:39913429	PSMD3	1.66666	0.0974793	0.838401	0.0733302	0.0439983	-0.0129065	0.159567
chr17:39913429	chr17:39913429	RAPGEFL1	-0.113965	0.909404	0.998469	-0.0122772	0.107727	-0.223423	0.198869
chr17:39913429	chr17:39913429	RARA	0.459459	0.646509	0.998469	0.0611702	0.133135	-0.199775	0.322115
chr17:39913429	chr17:39913429	STARD3	1.12792	0.260989	0.987976	0.0649672	0.0575989	-0.0479267	0.177861
chr17:39913429	chr17:39913429	TCAP	1.21633	0.225595	0.987976	0.224079	0.184225	-0.137002	0.585159
chr17:39913429	chr17:39913429	THRA	-0.493491	0.622322	0.998469	-0.0501407	0.101604	-0.249284	0.149003
chr17:39913429	chr17:39913429	TOP2A	-0.546175	0.585683	0.998469	-0.107848	0.197461	-0.494872	0.279176
chr17:39913429	chr17:39913429	WIPF2	1.40749	0.161163	0.94622	0.0833871	0.0592452	-0.0327334	0.199508
chr17:39913490	chr17:39913490	CASC3	-0.245719	0.806205	0.998469	-0.0202159	0.0822726	-0.18147	0.141038
chr17:39913490	chr17:39913490	CDC6	-2.85701	0.00482727	0.190077	-1.07659	0.376823	-1.81516	-0.338015
chr17:39913490	chr17:39913490	CDK12	0.789083	0.431196	0.998469	0.0793305	0.100535	-0.117718	0.276379
chr17:39913490	chr17:39913490	CSF3	-0.435706	0.66362	0.998469	-0.215045	0.493555	-1.18241	0.752324
chr17:39913490	chr17:39913490	ERBB2	0.571762	0.568262	0.998469	0.0483366	0.0845398	-0.117361	0.214035
chr17:39913490	chr17:39913490	GJD3	1.30498	0.193718	0.972286	0.279789	0.214402	-0.140438	0.700017
chr17:39913490	chr17:39913490	GRB7	0.180573	0.856924	0.998469	0.0267008	0.147867	-0.263118	0.31652
chr17:39913490	chr17:39913490	GSDMA	-0.371115	0.711028	0.998469	-0.153779	0.414371	-0.965947	0.658388
chr17:39913490	chr17:39913490	GSDMB	-0.127603	0.898619	0.998469	-0.0168303	0.131896	-0.275346	0.241686
chr17:39913490	chr17:39913490	IKZF3	0.181323	0.856337	0.998469	0.0497348	0.274289	-0.487871	0.587341
chr17:39913490	chr17:39913490	MED1	0.118607	0.905731	0.998469	0.0134963	0.11379	-0.209533	0.236526
chr17:39913490	chr17:39913490	MED24	1.8596	0.0647222	0.717102	0.113838	0.0612164	-0.00614598	0.233822
chr17:39913490	chr17:39913490	MIEN1	1.90356	0.0587087	0.717102	0.103992	0.0546305	-0.00308347	0.211068
chr17:39913490	chr17:39913490	MSL1	1.34961	0.178991	0.969004	0.173955	0.128893	-0.0786755	0.426586
chr17:39913490	chr17:39913490	NEUROD2	-0.128347	0.898031	0.998469	-0.0353596	0.2755	-0.57534	0.504621
chr17:39913490	chr17:39913490	NR1D1	-0.120198	0.904472	0.998469	-0.0265148	0.220592	-0.458875	0.405846
chr17:39913490	chr17:39913490	ORMDL3	-0.358031	0.720778	0.998469	-0.0238257	0.0665465	-0.154257	0.106605
chr17:39913490	chr17:39913490	PGAP3	-1.17294	0.242512	0.987976	-0.10109	0.0861855	-0.270014	0.0678336
chr17:39913490	chr17:39913490	PPP1R1B	0.0224407	0.982123	0.998469	0.00917567	0.408884	-0.792238	0.810589
chr17:39913490	chr17:39913490	PSMD3	-1.50522	0.134179	0.916586	-0.0855904	0.0568623	-0.197041	0.0258598
chr17:39913490	chr17:39913490	RAPGEFL1	0.289302	0.772713	0.998469	0.0402078	0.138982	-0.232197	0.312612
chr17:39913490	chr17:39913490	RARA	0.187633	0.851395	0.998469	0.0322521	0.171889	-0.304651	0.369155
chr17:39913490	chr17:39913490	STARD3	-1.86417	0.0640741	0.717102	-0.137647	0.0738382	-0.28237	0.00707581
chr17:39913490	chr17:39913490	TCAP	1.87822	0.0621154	0.717102	0.443776	0.236275	-0.0193228	0.906874
chr17:39913490	chr17:39913490	THRA	-0.673992	0.50126	0.998469	-0.0883107	0.131026	-0.345123	0.168501
chr17:39913490	chr17:39913490	TOP2A	-0.836515	0.404075	0.998469	-0.212889	0.254495	-0.7117	0.285922
chr17:39913490	chr17:39913490	WIPF2	0.40428	0.68653	0.998469	0.0310769	0.0768696	-0.119588	0.181741
chr17:39913513	chr17:39913513	CASC3	0.100817	0.919818	0.998469	0.00793005	0.0786578	-0.146239	0.162099
chr17:39913513	chr17:39913513	CDC6	-2.50118	0.0133532	0.33119	-0.905957	0.362211	-1.61589	-0.196022
chr17:39913513	chr17:39913513	CDK12	0.721687	0.471508	0.998469	0.0693778	0.0961328	-0.119042	0.257798
chr17:39913513	chr17:39913513	CSF3	-0.204748	0.838021	0.998469	-0.0966432	0.47201	-1.02178	0.828496
chr17:39913513	chr17:39913513	ERBB2	0.56923	0.569974	0.998469	0.0460016	0.0808138	-0.112393	0.204397
chr17:39913513	chr17:39913513	GJD3	2.19579	0.0295023	0.469615	0.445877	0.20306	0.0478801	0.843875
chr17:39913513	chr17:39913513	GRB7	0.213085	0.831523	0.998469	0.0301181	0.141343	-0.246914	0.307151
chr17:39913513	chr17:39913513	GSDMA	-0.29187	0.770753	0.998469	-0.115629	0.396168	-0.892118	0.660859
chr17:39913513	chr17:39913513	GSDMB	-0.105856	0.915825	0.998469	-0.0133467	0.126084	-0.26047	0.233777
chr17:39913513	chr17:39913513	IKZF3	0.010885	0.991328	0.998469	0.00285429	0.262224	-0.511104	0.516813
chr17:39913513	chr17:39913513	MED1	-0.171907	0.863721	0.998469	-0.0186982	0.108769	-0.231886	0.194489
chr17:39913513	chr17:39913513	MED24	1.57579	0.116991	0.895617	0.0924796	0.0586879	-0.0225487	0.207508
chr17:39913513	chr17:39913513	MIEN1	1.64832	0.10119	0.842124	0.0863112	0.0523632	-0.0163207	0.188943
chr17:39913513	chr17:39913513	MSL1	1.27924	0.20261	0.986682	0.157704	0.12328	-0.0839244	0.399332
chr17:39913513	chr17:39913513	NEUROD2	0.0718363	0.942819	0.998469	0.0189191	0.263365	-0.497275	0.535114
chr17:39913513	chr17:39913513	NR1D1	-0.877593	0.381441	0.998469	-0.184634	0.210387	-0.596992	0.227724
chr17:39913513	chr17:39913513	ORMDL3	0.343994	0.731289	0.998469	0.0218831	0.0636149	-0.102802	0.146568
chr17:39913513	chr17:39913513	PGAP3	-0.713653	0.47645	0.998469	-0.0589489	0.0826016	-0.220848	0.10295
chr17:39913513	chr17:39913513	PPP1R1B	0.107033	0.914892	0.998469	0.0418337	0.390847	-0.724226	0.807893
chr17:39913513	chr17:39913513	PSMD3	-0.962543	0.337185	0.998469	-0.0525304	0.0545746	-0.159497	0.0544358
chr17:39913513	chr17:39913513	RAPGEFL1	0.381217	0.703533	0.998469	0.0506372	0.13283	-0.20971	0.310985
chr17:39913513	chr17:39913513	RARA	0.211851	0.832485	0.998469	0.0348086	0.164307	-0.287234	0.356851
chr17:39913513	chr17:39913513	STARD3	-1.68714	0.0934668	0.822241	-0.119306	0.0707153	-0.257908	0.0192957
chr17:39913513	chr17:39913513	TCAP	1.56398	0.119739	0.898459	0.354378	0.226588	-0.0897337	0.79849
chr17:39913513	chr17:39913513	THRA	-0.108104	0.914045	0.998469	-0.0135582	0.125418	-0.259378	0.232262
chr17:39913513	chr17:39913513	TOP2A	-0.60555	0.545646	0.998469	-0.147465	0.243522	-0.624767	0.329838
chr17:39913513	chr17:39913513	WIPF2	0.178796	0.858317	0.998469	0.0131434	0.0735103	-0.130937	0.157224
rs6503524	chr17:39913556	CASC3	-0.0574322	0.95427	0.998469	-0.00271047	0.0471943	-0.0952113	0.0897904
rs6503524	chr17:39913556	CDC6	0.0127773	0.989821	0.998469	0.00282893	0.221402	-0.431119	0.436777
rs6503524	chr17:39913556	CDK12	0.0623766	0.950338	0.998469	0.00360339	0.0577683	-0.109623	0.116829
rs6503524	chr17:39913556	CSF3	0.367435	0.713766	0.998469	0.104027	0.283118	-0.450884	0.658939
rs6503524	chr17:39913556	ERBB2	0.938649	0.349283	0.998469	0.0454357	0.0484054	-0.0494389	0.14031
rs6503524	chr17:39913556	GJD3	0.92539	0.356114	0.998469	0.114082	0.12328	-0.127547	0.355711
rs6503524	chr17:39913556	GRB7	0.982638	0.327224	0.998469	0.0830998	0.0845681	-0.0826536	0.248853
rs6503524	chr17:39913556	GSDMA	1.26361	0.208152	0.987976	0.298987	0.236613	-0.164775	0.762749
rs6503524	chr17:39913556	GSDMB	3.42006	0.000789041	0.0561822	0.250019	0.0731038	0.106736	0.393303
rs6503524	chr17:39913556	IKZF3	0.295793	0.76776	0.998469	0.0465247	0.157288	-0.26176	0.354809
rs6503524	chr17:39913556	MED1	-0.0047554	0.996212	0.998469	-0.000310364	0.0652655	-0.128231	0.12761
rs6503524	chr17:39913556	MED24	-0.750819	0.453831	0.998469	-0.0265905	0.0354153	-0.0960045	0.0428235
rs6503524	chr17:39913556	MIEN1	1.45001	0.148955	0.922393	0.0456385	0.0314747	-0.0160519	0.107329
rs6503524	chr17:39913556	MSL1	1.70425	0.0902177	0.810142	0.125579	0.0736859	-0.0188455	0.270003
rs6503524	chr17:39913556	NEUROD2	0.0715585	0.94304	0.998469	0.0113073	0.158014	-0.298401	0.321015
rs6503524	chr17:39913556	NR1D1	0.836193	0.404255	0.998469	0.105574	0.126255	-0.141887	0.353035
rs6503524	chr17:39913556	ORMDL3	0.187864	0.851214	0.998469	0.00717216	0.0381774	-0.0676556	0.0819999
rs6503524	chr17:39913556	PGAP3	2.55464	0.0115341	0.322749	0.124366	0.0486826	0.0289485	0.219784
rs6503524	chr17:39913556	PPP1R1B	-0.802626	0.423346	0.998469	-0.187857	0.234053	-0.646601	0.270887
rs6503524	chr17:39913556	PSMD3	0.440008	0.660507	0.998469	0.0144395	0.0328164	-0.0498807	0.0787596
rs6503524	chr17:39913556	RAPGEFL1	-0.0461291	0.963263	0.998469	-0.0036779	0.0797306	-0.15995	0.152594
rs6503524	chr17:39913556	RARA	2.39633	0.0176789	0.362588	0.232259	0.0969229	0.0422901	0.422228
rs6503524	chr17:39913556	STARD3	0.738949	0.460988	0.998469	0.0315692	0.0427218	-0.0521655	0.115304
rs6503524	chr17:39913556	TCAP	0.541262	0.589057	0.998469	0.0740615	0.136831	-0.194128	0.342251
rs6503524	chr17:39913556	THRA	-1.20926	0.228291	0.987976	-0.0905985	0.0749203	-0.237442	0.0562453
rs6503524	chr17:39913556	TOP2A	-0.544663	0.586721	0.998469	-0.0795969	0.14614	-0.366031	0.206837
rs6503524	chr17:39913556	WIPF2	-0.25071	0.80235	0.998469	-0.0110565	0.0441008	-0.0974941	0.0753811
rs7216389	chr17:39913696	CASC3	-0.0574322	0.95427	0.998469	-0.00271047	0.0471943	-0.0952113	0.0897904
rs7216389	chr17:39913696	CDC6	0.0127773	0.989821	0.998469	0.00282893	0.221402	-0.431119	0.436777
rs7216389	chr17:39913696	CDK12	0.0623766	0.950338	0.998469	0.00360339	0.0577683	-0.109623	0.116829
rs7216389	chr17:39913696	CSF3	0.367435	0.713766	0.998469	0.104027	0.283118	-0.450884	0.658939
rs7216389	chr17:39913696	ERBB2	0.938649	0.349283	0.998469	0.0454357	0.0484054	-0.0494389	0.14031
rs7216389	chr17:39913696	GJD3	0.92539	0.356114	0.998469	0.114082	0.12328	-0.127547	0.355711
rs7216389	chr17:39913696	GRB7	0.982638	0.327224	0.998469	0.0830998	0.0845681	-0.0826536	0.248853
rs7216389	chr17:39913696	GSDMA	1.26361	0.208152	0.987976	0.298987	0.236613	-0.164775	0.762749
rs7216389	chr17:39913696	GSDMB	3.42006	0.000789041	0.0561822	0.250019	0.0731038	0.106736	0.393303
rs7216389	chr17:39913696	IKZF3	0.295793	0.76776	0.998469	0.0465247	0.157288	-0.26176	0.354809
rs7216389	chr17:39913696	MED1	-0.0047554	0.996212	0.998469	-0.000310364	0.0652655	-0.128231	0.12761
rs7216389	chr17:39913696	MED24	-0.750819	0.453831	0.998469	-0.0265905	0.0354153	-0.0960045	0.0428235
rs7216389	chr17:39913696	MIEN1	1.45001	0.148955	0.922393	0.0456385	0.0314747	-0.0160519	0.107329
rs7216389	chr17:39913696	MSL1	1.70425	0.0902177	0.810142	0.125579	0.0736859	-0.0188455	0.270003
rs7216389	chr17:39913696	NEUROD2	0.0715585	0.94304	0.998469	0.0113073	0.158014	-0.298401	0.321015
rs7216389	chr17:39913696	NR1D1	0.836193	0.404255	0.998469	0.105574	0.126255	-0.141887	0.353035
rs7216389	chr17:39913696	ORMDL3	0.187864	0.851214	0.998469	0.00717216	0.0381774	-0.0676556	0.0819999
rs7216389	chr17:39913696	PGAP3	2.55464	0.0115341	0.322749	0.124366	0.0486826	0.0289485	0.219784
rs7216389	chr17:39913696	PPP1R1B	-0.802626	0.423346	0.998469	-0.187857	0.234053	-0.646601	0.270887
rs7216389	chr17:39913696	PSMD3	0.440008	0.660507	0.998469	0.0144395	0.0328164	-0.0498807	0.0787596
rs7216389	chr17:39913696	RAPGEFL1	-0.0461291	0.963263	0.998469	-0.0036779	0.0797306	-0.15995	0.152594
rs7216389	chr17:39913696	RARA	2.39633	0.0176789	0.362588	0.232259	0.0969229	0.0422901	0.422228
rs7216389	chr17:39913696	STARD3	0.738949	0.460988	0.998469	0.0315692	0.0427218	-0.0521655	0.115304
rs7216389	chr17:39913696	TCAP	0.541262	0.589057	0.998469	0.0740615	0.136831	-0.194128	0.342251
rs7216389	chr17:39913696	THRA	-1.20926	0.228291	0.987976	-0.0905985	0.0749203	-0.237442	0.0562453
rs7216389	chr17:39913696	TOP2A	-0.544663	0.586721	0.998469	-0.0795969	0.14614	-0.366031	0.206837
rs7216389	chr17:39913696	WIPF2	-0.25071	0.80235	0.998469	-0.0110565	0.0441008	-0.0974941	0.0753811
chr17:39913818	chr17:39913818	CASC3	-0.407805	0.683945	0.998469	-0.0153911	0.0377413	-0.0893639	0.0585818
chr17:39913818	chr17:39913818	CDC6	0.00250932	0.998001	0.998469	0.000444508	0.177143	-0.346755	0.347644
chr17:39913818	chr17:39913818	CDK12	0.651723	0.515487	0.998469	0.0300844	0.0461612	-0.0603917	0.12056
chr17:39913818	chr17:39913818	CSF3	0.0842559	0.932955	0.998469	0.0190931	0.226609	-0.42506	0.463246
chr17:39913818	chr17:39913818	ERBB2	-0.359854	0.719416	0.998469	-0.0139684	0.0388169	-0.0900496	0.0621127
chr17:39913818	chr17:39913818	GJD3	0.2398	0.810783	0.998469	0.02371	0.0988741	-0.170083	0.217503
chr17:39913818	chr17:39913818	GRB7	0.352826	0.724669	0.998469	0.0239338	0.0678345	-0.109022	0.156889
chr17:39913818	chr17:39913818	GSDMA	-1.87237	0.0629247	0.717102	-0.35245	0.188237	-0.721395	0.016495
chr17:39913818	chr17:39913818	GSDMB	2.20636	0.0287401	0.462296	0.131618	0.059654	0.0146964	0.24854
chr17:39913818	chr17:39913818	IKZF3	-0.267423	0.789477	0.998469	-0.0336556	0.125851	-0.280324	0.213013
chr17:39913818	chr17:39913818	MED1	-1.16745	0.244711	0.987976	-0.0607125	0.0520042	-0.162641	0.0412158
chr17:39913818	chr17:39913818	MED24	-0.84429	0.39973	0.998469	-0.0239127	0.0283228	-0.0794254	0.0316001
chr17:39913818	chr17:39913818	MIEN1	0.163028	0.870696	0.998469	0.00413123	0.0253407	-0.0455364	0.0537989
chr17:39913818	chr17:39913818	MSL1	0.226216	0.821314	0.998469	0.0134515	0.0594631	-0.103096	0.129999
chr17:39913818	chr17:39913818	NEUROD2	-0.210821	0.833287	0.998469	-0.0266502	0.126411	-0.274416	0.221116
chr17:39913818	chr17:39913818	NR1D1	-0.693056	0.489249	0.998469	-0.0700562	0.101083	-0.268179	0.128067
chr17:39913818	chr17:39913818	ORMDL3	0.398105	0.691067	0.998469	0.0121558	0.0305341	-0.0476911	0.0720027
chr17:39913818	chr17:39913818	PGAP3	1.38364	0.168338	0.94622	0.0546331	0.0394851	-0.0227576	0.132024
chr17:39913818	chr17:39913818	PPP1R1B	0.672158	0.502423	0.998469	0.125945	0.187373	-0.241307	0.493196
chr17:39913818	chr17:39913818	PSMD3	-0.0213809	0.982968	0.998469	-0.00056171	0.0262716	-0.052054	0.0509306
chr17:39913818	chr17:39913818	RAPGEFL1	-0.689855	0.491254	0.998469	-0.0439442	0.0637006	-0.168797	0.0809089
chr17:39913818	chr17:39913818	RARA	0.466193	0.641692	0.998469	0.0367516	0.0788334	-0.117762	0.191265
chr17:39913818	chr17:39913818	STARD3	-0.0565167	0.954999	0.998469	-0.001935	0.0342376	-0.0690407	0.0651707
chr17:39913818	chr17:39913818	TCAP	-0.544346	0.586938	0.998469	-0.0595932	0.109477	-0.274168	0.154981
chr17:39913818	chr17:39913818	THRA	-2.27614	0.0241234	0.421763	-0.13494	0.0592848	-0.251139	-0.0187422
chr17:39913818	chr17:39913818	TOP2A	0.184269	0.854029	0.998469	0.0215629	0.117019	-0.207793	0.250919
chr17:39913818	chr17:39913818	WIPF2	-0.862448	0.389693	0.998469	-0.0303687	0.0352122	-0.0993847	0.0386472
chr17:39914301	chr17:39914301	CASC3	1.76607	0.0792341	0.775259	0.1273	0.0720808	-0.0139789	0.268578
chr17:39914301	chr17:39914301	CDC6	-0.0494622	0.960611	0.998469	-0.0168828	0.341327	-0.685884	0.652119
chr17:39914301	chr17:39914301	CDK12	-0.28841	0.773395	0.998469	-0.0256796	0.0890384	-0.200195	0.148836
chr17:39914301	chr17:39914301	CSF3	-0.406014	0.685258	0.998469	-0.177199	0.436436	-1.03261	0.678215
chr17:39914301	chr17:39914301	ERBB2	2.27955	0.0239154	0.421763	0.167942	0.0736732	0.0235422	0.312341
chr17:39914301	chr17:39914301	GJD3	-0.263969	0.792133	0.998469	-0.0502888	0.19051	-0.423688	0.323111
chr17:39914301	chr17:39914301	GRB7	1.1219	0.263534	0.988391	0.14614	0.130261	-0.109172	0.401453
chr17:39914301	chr17:39914301	GSDMA	0.784454	0.433899	0.998469	0.287	0.365859	-0.430084	1.00408
chr17:39914301	chr17:39914301	GSDMB	1.41663	0.158476	0.945122	0.164224	0.115926	-0.0629904	0.391438
chr17:39914301	chr17:39914301	IKZF3	0.77272	0.440794	0.998469	0.187086	0.242113	-0.287456	0.661628
chr17:39914301	chr17:39914301	MED1	1.53521	0.126647	0.898459	0.153379	0.0999071	-0.0424394	0.349196
chr17:39914301	chr17:39914301	MED24	0.0262409	0.979097	0.998469	0.00143516	0.0546919	-0.105761	0.108631
chr17:39914301	chr17:39914301	MIEN1	-1.977	0.0497076	0.679656	-0.0954173	0.0482636	-0.190014	-0.000820542
chr17:39914301	chr17:39914301	MSL1	0.575619	0.565657	0.998469	0.065897	0.11448	-0.158484	0.290278
chr17:39914301	chr17:39914301	NEUROD2	-0.199225	0.842332	0.998469	-0.0485275	0.243581	-0.525946	0.428891
chr17:39914301	chr17:39914301	NR1D1	-0.345155	0.730417	0.998469	-0.0673005	0.194986	-0.449473	0.314872
chr17:39914301	chr17:39914301	ORMDL3	0.966977	0.334971	0.998469	0.056759	0.0586973	-0.0582878	0.171806
chr17:39914301	chr17:39914301	PGAP3	1.91617	0.0570717	0.717102	0.145026	0.075685	-0.0033169	0.293368
chr17:39914301	chr17:39914301	PPP1R1B	0.970414	0.33326	0.998469	0.349844	0.36051	-0.356755	1.05644
chr17:39914301	chr17:39914301	PSMD3	-0.0212786	0.983049	0.998469	-0.00107716	0.0506217	-0.100296	0.0981415
chr17:39914301	chr17:39914301	RAPGEFL1	0.202381	0.839868	0.998469	0.0248734	0.122904	-0.216018	0.265765
chr17:39914301	chr17:39914301	RARA	0.617821	0.537545	0.998469	0.0938011	0.151826	-0.203777	0.39138
chr17:39914301	chr17:39914301	STARD3	1.30349	0.194222	0.972286	0.0855546	0.0656348	-0.0430897	0.214199
chr17:39914301	chr17:39914301	TCAP	1.54006	0.125462	0.898459	0.32285	0.209635	-0.0880345	0.733734
chr17:39914301	chr17:39914301	THRA	0.312187	0.755293	0.998469	0.0362071	0.115979	-0.191112	0.263526
chr17:39914301	chr17:39914301	TOP2A	0.339547	0.734629	0.998469	0.0765419	0.225423	-0.365288	0.518372
chr17:39914301	chr17:39914301	WIPF2	-0.211116	0.833057	0.998469	-0.0143544	0.0679928	-0.14762	0.118911
chr17:39914536	chr17:39914536	CASC3	-0.297715	0.766295	0.998469	-0.0147735	0.049623	-0.112035	0.0824876
chr17:39914536	chr17:39914536	CDC6	0.46303	0.643953	0.998469	0.107749	0.232705	-0.348352	0.563851
chr17:39914536	chr17:39914536	CDK12	-0.156786	0.875605	0.998469	-0.00952522	0.060753	-0.128601	0.109551
chr17:39914536	chr17:39914536	CSF3	0.564403	0.573246	0.998469	0.167966	0.297599	-0.415329	0.75126
chr17:39914536	chr17:39914536	ERBB2	0.824089	0.411079	0.998469	0.0419796	0.0509406	-0.057864	0.141823
chr17:39914536	chr17:39914536	GJD3	0.391977	0.695581	0.998469	0.0509309	0.129933	-0.203739	0.3056
chr17:39914536	chr17:39914536	GRB7	0.752667	0.452723	0.998469	0.0670251	0.0890502	-0.107513	0.241564
chr17:39914536	chr17:39914536	GSDMA	1.16647	0.245108	0.987976	0.290486	0.24903	-0.197613	0.778586
chr17:39914536	chr17:39914536	GSDMB	3.05221	0.00264833	0.110763	0.236268	0.077409	0.0845466	0.38799
chr17:39914536	chr17:39914536	IKZF3	0.0277826	0.977869	0.998469	0.00459715	0.165469	-0.319721	0.328916
chr17:39914536	chr17:39914536	MED1	0.196116	0.844761	0.998469	0.0134602	0.068634	-0.121062	0.147983
chr17:39914536	chr17:39914536	MED24	-0.463512	0.643608	0.998469	-0.0172829	0.0372868	-0.0903649	0.0557992
chr17:39914536	chr17:39914536	MIEN1	1.18181	0.238983	0.987976	0.0392043	0.0331732	-0.0258151	0.104224
chr17:39914536	chr17:39914536	MSL1	1.34423	0.18072	0.972286	0.104517	0.0777525	-0.0478779	0.256912
chr17:39914536	chr17:39914536	NEUROD2	-0.344212	0.731125	0.998469	-0.0571846	0.166132	-0.382803	0.268434
chr17:39914536	chr17:39914536	NR1D1	0.19308	0.847134	0.998469	0.0256899	0.133053	-0.235094	0.286474
chr17:39914536	chr17:39914536	ORMDL3	0.0290301	0.976876	0.998469	0.00116575	0.0401567	-0.0775413	0.0798728
chr17:39914536	chr17:39914536	PGAP3	2.11008	0.0363593	0.553376	0.108698	0.0515135	0.0077313	0.209664
chr17:39914536	chr17:39914536	PPP1R1B	-0.65381	0.514145	0.998469	-0.161048	0.246323	-0.643841	0.321744
chr17:39914536	chr17:39914536	PSMD3	-0.520601	0.603343	0.998469	-0.0179639	0.034506	-0.0855957	0.0496679
chr17:39914536	chr17:39914536	RAPGEFL1	-0.193726	0.846629	0.998469	-0.0162432	0.0838463	-0.180582	0.148096
chr17:39914536	chr17:39914536	RARA	1.18775	0.23664	0.987976	0.122641	0.103255	-0.0797392	0.325021
chr17:39914536	chr17:39914536	STARD3	0.751091	0.453668	0.998469	0.0337461	0.0449295	-0.0543156	0.121808
chr17:39914536	chr17:39914536	TCAP	-0.0216533	0.982751	0.998469	-0.00311889	0.144038	-0.285432	0.279195
chr17:39914536	chr17:39914536	THRA	-1.09354	0.275751	0.991261	-0.0862357	0.0788593	-0.2408	0.0683286
chr17:39914536	chr17:39914536	TOP2A	-0.272455	0.785613	0.998469	-0.0419045	0.153804	-0.34336	0.259551
chr17:39914536	chr17:39914536	WIPF2	-0.960758	0.33808	0.998469	-0.0444465	0.0462619	-0.13512	0.0462268
chr17:39914875	chr17:39914875	CASC3	-0.12668	0.899348	0.998469	-0.0100728	0.0795136	-0.165919	0.145774
chr17:39914875	chr17:39914875	CDC6	-2.45679	0.0150537	0.352013	-0.900156	0.366395	-1.61829	-0.182022
chr17:39914875	chr17:39914875	CDK12	0.624495	0.533165	0.998469	0.0607127	0.0972189	-0.129836	0.251262
chr17:39914875	chr17:39914875	CSF3	-0.823909	0.411181	0.998469	-0.392375	0.476236	-1.3258	0.541047
chr17:39914875	chr17:39914875	ERBB2	0.919089	0.35939	0.998469	0.0749666	0.0815662	-0.0849031	0.234836
chr17:39914875	chr17:39914875	GJD3	1.01242	0.312818	0.998469	0.210186	0.207607	-0.196723	0.617094
chr17:39914875	chr17:39914875	GRB7	-0.0922639	0.9266	0.998469	-0.0131845	0.1429	-0.293268	0.266899
chr17:39914875	chr17:39914875	GSDMA	-0.285746	0.775431	0.998469	-0.114438	0.400489	-0.899398	0.670521
chr17:39914875	chr17:39914875	GSDMB	-0.659956	0.510202	0.998469	-0.0840085	0.127294	-0.333505	0.165488
chr17:39914875	chr17:39914875	IKZF3	-0.374177	0.708753	0.998469	-0.0991452	0.264969	-0.618485	0.420194
chr17:39914875	chr17:39914875	MED1	0.346551	0.72937	0.998469	0.0380944	0.109924	-0.177358	0.253546
chr17:39914875	chr17:39914875	MED24	1.83037	0.0689984	0.732207	0.108312	0.0591746	-0.00767062	0.224294
chr17:39914875	chr17:39914875	MIEN1	1.06815	0.287011	0.991261	0.0568091	0.0531843	-0.0474322	0.16105
chr17:39914875	chr17:39914875	MSL1	1.30646	0.193215	0.972286	0.162781	0.124597	-0.0814295	0.406991
chr17:39914875	chr17:39914875	NEUROD2	-0.610024	0.542685	0.998469	-0.162229	0.265939	-0.68347	0.359012
chr17:39914875	chr17:39914875	NR1D1	0.0891991	0.929032	0.998469	0.0190146	0.21317	-0.398799	0.436828
chr17:39914875	chr17:39914875	ORMDL3	-0.192614	0.847498	0.998469	-0.0123897	0.064324	-0.138465	0.113685
chr17:39914875	chr17:39914875	PGAP3	-0.663562	0.507897	0.998469	-0.0554202	0.0835193	-0.219118	0.108278
chr17:39914875	chr17:39914875	PPP1R1B	0.117231	0.906819	0.998469	0.0463186	0.395104	-0.728085	0.820722
chr17:39914875	chr17:39914875	PSMD3	-1.297	0.196443	0.974132	-0.071392	0.0550442	-0.179279	0.0364946
chr17:39914875	chr17:39914875	RAPGEFL1	0.692468	0.489617	0.998469	0.0928894	0.134142	-0.17003	0.355809
chr17:39914875	chr17:39914875	RARA	0.352551	0.724875	0.998469	0.058544	0.166058	-0.26693	0.384018
chr17:39914875	chr17:39914875	STARD3	-2.05692	0.041268	0.590769	-0.146438	0.071193	-0.285977	-0.0069001
chr17:39914875	chr17:39914875	TCAP	1.52207	0.129906	0.91449	0.348775	0.229146	-0.10035	0.7979
chr17:39914875	chr17:39914875	THRA	-0.55777	0.577758	0.998469	-0.0706529	0.12667	-0.318927	0.177621
chr17:39914875	chr17:39914875	TOP2A	-0.344905	0.730605	0.998469	-0.0849709	0.24636	-0.567837	0.397895
chr17:39914875	chr17:39914875	WIPF2	-0.159567	0.873418	0.998469	-0.0118579	0.0743129	-0.157511	0.133795
rs8065520	chr17:39915395	CASC3	0.41612	0.677863	0.998469	0.0180605	0.0434021	-0.0670076	0.103129
rs8065520	chr17:39915395	CDC6	0.00887092	0.992933	0.998469	0.00180715	0.203717	-0.397477	0.401092
rs8065520	chr17:39915395	CDK12	-0.692138	0.489824	0.998469	-0.0367369	0.0530774	-0.140769	0.0672948
rs8065520	chr17:39915395	CSF3	0.241095	0.809781	0.998469	0.0628204	0.260563	-0.447883	0.573524
rs8065520	chr17:39915395	ERBB2	1.28138	0.201859	0.985276	0.0569405	0.044437	-0.030156	0.144037
rs8065520	chr17:39915395	GJD3	0.574116	0.566671	0.998469	0.0652271	0.113613	-0.157455	0.287909
rs8065520	chr17:39915395	GRB7	0.496279	0.620358	0.998469	0.0387008	0.0779819	-0.114144	0.191545
rs8065520	chr17:39915395	GSDMA	3.40112	0.000841891	0.0561822	0.719256	0.211476	0.304763	1.13375
rs8065520	chr17:39915395	GSDMB	0.540679	0.589458	0.998469	0.0376021	0.069546	-0.0987081	0.173912
rs8065520	chr17:39915395	IKZF3	0.580157	0.5626	0.998469	0.0838994	0.144615	-0.199546	0.367344
rs8065520	chr17:39915395	MED1	1.33993	0.182109	0.972286	0.0800316	0.059728	-0.0370354	0.197099
rs8065520	chr17:39915395	MED24	0.279254	0.780399	0.998469	0.00911325	0.0326342	-0.0548498	0.0730763
rs8065520	chr17:39915395	MIEN1	1.14279	0.254783	0.987976	0.0331748	0.0290298	-0.0237236	0.0900733
rs8065520	chr17:39915395	MSL1	1.301	0.195073	0.972286	0.0885276	0.0680459	-0.0448423	0.221898
rs8065520	chr17:39915395	NEUROD2	0.308345	0.758209	0.998469	0.0448188	0.145352	-0.240072	0.32971
rs8065520	chr17:39915395	NR1D1	1.57536	0.11709	0.895617	0.182033	0.11555	-0.0444458	0.408511
rs8065520	chr17:39915395	ORMDL3	-0.284838	0.776125	0.998469	-0.0100043	0.0351229	-0.0788453	0.0588366
rs8065520	chr17:39915395	PGAP3	0.724516	0.469775	0.998469	0.0330369	0.0455986	-0.0563363	0.12241
rs8065520	chr17:39915395	PPP1R1B	-1.51953	0.130543	0.915945	-0.32561	0.214283	-0.745604	0.0943848
rs8065520	chr17:39915395	PSMD3	0.429451	0.668155	0.998469	0.0129676	0.0301959	-0.0462162	0.0721515
rs8065520	chr17:39915395	RAPGEFL1	0.751039	0.453699	0.998469	0.0550039	0.0732371	-0.0885408	0.198549
rs8065520	chr17:39915395	RARA	1.64506	0.10186	0.842124	0.14803	0.0899843	-0.0283393	0.324399
rs8065520	chr17:39915395	STARD3	0.745044	0.457305	0.998469	0.0292862	0.0393081	-0.0477576	0.10633
rs8065520	chr17:39915395	TCAP	1.12735	0.261233	0.987976	0.141516	0.12553	-0.104523	0.387556
rs8065520	chr17:39915395	THRA	1.47939	0.140944	0.916586	0.101761	0.0687858	-0.0330594	0.236581
rs8065520	chr17:39915395	TOP2A	-0.713694	0.476425	0.998469	-0.095906	0.13438	-0.35929	0.167478
rs8065520	chr17:39915395	WIPF2	0.760289	0.448167	0.998469	0.030803	0.0405148	-0.0486061	0.110212
chr17:39915920	chr17:39915920	CASC3	-0.302851	0.762385	0.998469	-0.0150201	0.0495958	-0.112228	0.0821875
chr17:39915920	chr17:39915920	CDC6	0.485984	0.627623	0.998469	0.113023	0.232564	-0.342803	0.568848
chr17:39915920	chr17:39915920	CDK12	-0.144515	0.88527	0.998469	-0.00877509	0.0607209	-0.127788	0.110238
chr17:39915920	chr17:39915920	CSF3	0.587469	0.557692	0.998469	0.174722	0.297415	-0.408211	0.757655
chr17:39915920	chr17:39915920	ERBB2	0.827538	0.409128	0.998469	0.0421318	0.0509122	-0.0576562	0.14192
chr17:39915920	chr17:39915920	GJD3	0.381059	0.70365	0.998469	0.0494868	0.129867	-0.205052	0.304025
chr17:39915920	chr17:39915920	GRB7	0.823124	0.411626	0.998469	0.0732352	0.0889723	-0.10115	0.247621
chr17:39915920	chr17:39915920	GSDMA	1.19305	0.234561	0.987976	0.29689	0.248849	-0.190854	0.784634
chr17:39915920	chr17:39915920	GSDMB	3.12449	0.00210462	0.0955141	0.241424	0.0772683	0.089978	0.39287
chr17:39915920	chr17:39915920	IKZF3	0.027773	0.977877	0.998469	0.00459308	0.165379	-0.31955	0.328736
chr17:39915920	chr17:39915920	MED1	0.190364	0.849258	0.998469	0.0130585	0.0685974	-0.121392	0.147509
chr17:39915920	chr17:39915920	MED24	-0.516999	0.605849	0.998469	-0.0192637	0.0372607	-0.0922947	0.0537673
chr17:39915920	chr17:39915920	MIEN1	1.18401	0.238113	0.987976	0.0392555	0.0331547	-0.0257278	0.104239
chr17:39915920	chr17:39915920	MSL1	1.31766	0.189445	0.972286	0.102418	0.077727	-0.0499274	0.254762
chr17:39915920	chr17:39915920	NEUROD2	-0.324398	0.746048	0.998469	-0.0538658	0.166049	-0.379322	0.27159
chr17:39915920	chr17:39915920	NR1D1	0.176337	0.860245	0.998469	0.02345	0.132984	-0.237198	0.284098
chr17:39915920	chr17:39915920	ORMDL3	0.0511491	0.959269	0.998469	0.00205286	0.0401348	-0.0766113	0.080717
chr17:39915920	chr17:39915920	PGAP3	2.11692	0.0357662	0.548845	0.108982	0.0514813	0.00807831	0.209885
chr17:39915920	chr17:39915920	PPP1R1B	-0.74061	0.459982	0.998469	-0.182264	0.2461	-0.66462	0.300092
chr17:39915920	chr17:39915920	PSMD3	-0.430719	0.667235	0.998469	-0.0148582	0.0344963	-0.082471	0.0527546
chr17:39915920	chr17:39915920	RAPGEFL1	-0.182664	0.855286	0.998469	-0.0153076	0.0838021	-0.17956	0.148945
chr17:39915920	chr17:39915920	RARA	1.21084	0.227687	0.987976	0.124938	0.103182	-0.0772996	0.327175
chr17:39915920	chr17:39915920	STARD3	0.732732	0.464761	0.998469	0.0329062	0.0449089	-0.0551152	0.120928
chr17:39915920	chr17:39915920	TCAP	-0.0265415	0.978858	0.998469	-0.0038209	0.14396	-0.285982	0.27834
chr17:39915920	chr17:39915920	THRA	-1.12734	0.261237	0.987976	-0.0888329	0.078799	-0.243279	0.0656131
chr17:39915920	chr17:39915920	TOP2A	-0.227153	0.820586	0.998469	-0.0349204	0.153731	-0.336233	0.266393
chr17:39915920	chr17:39915920	WIPF2	-1.03166	0.303741	0.998469	-0.0476805	0.0462173	-0.138266	0.0429053
chr17:39915994	chr17:39915994	CASC3	-0.302851	0.762385	0.998469	-0.0150201	0.0495958	-0.112228	0.0821875
chr17:39915994	chr17:39915994	CDC6	0.485984	0.627623	0.998469	0.113023	0.232564	-0.342803	0.568848
chr17:39915994	chr17:39915994	CDK12	-0.144515	0.88527	0.998469	-0.00877509	0.0607209	-0.127788	0.110238
chr17:39915994	chr17:39915994	CSF3	0.587469	0.557692	0.998469	0.174722	0.297415	-0.408211	0.757655
chr17:39915994	chr17:39915994	ERBB2	0.827538	0.409128	0.998469	0.0421318	0.0509122	-0.0576562	0.14192
chr17:39915994	chr17:39915994	GJD3	0.381059	0.70365	0.998469	0.0494868	0.129867	-0.205052	0.304025
chr17:39915994	chr17:39915994	GRB7	0.823124	0.411626	0.998469	0.0732352	0.0889723	-0.10115	0.247621
chr17:39915994	chr17:39915994	GSDMA	1.19305	0.234561	0.987976	0.29689	0.248849	-0.190854	0.784634
chr17:39915994	chr17:39915994	GSDMB	3.12449	0.00210462	0.0955141	0.241424	0.0772683	0.089978	0.39287
chr17:39915994	chr17:39915994	IKZF3	0.027773	0.977877	0.998469	0.00459308	0.165379	-0.31955	0.328736
chr17:39915994	chr17:39915994	MED1	0.190364	0.849258	0.998469	0.0130585	0.0685974	-0.121392	0.147509
chr17:39915994	chr17:39915994	MED24	-0.516999	0.605849	0.998469	-0.0192637	0.0372607	-0.0922947	0.0537673
chr17:39915994	chr17:39915994	MIEN1	1.18401	0.238113	0.987976	0.0392555	0.0331547	-0.0257278	0.104239
chr17:39915994	chr17:39915994	MSL1	1.31766	0.189445	0.972286	0.102418	0.077727	-0.0499274	0.254762
chr17:39915994	chr17:39915994	NEUROD2	-0.324398	0.746048	0.998469	-0.0538658	0.166049	-0.379322	0.27159
chr17:39915994	chr17:39915994	NR1D1	0.176337	0.860245	0.998469	0.02345	0.132984	-0.237198	0.284098
chr17:39915994	chr17:39915994	ORMDL3	0.0511491	0.959269	0.998469	0.00205286	0.0401348	-0.0766113	0.080717
chr17:39915994	chr17:39915994	PGAP3	2.11692	0.0357662	0.548845	0.108982	0.0514813	0.00807831	0.209885
chr17:39915994	chr17:39915994	PPP1R1B	-0.74061	0.459982	0.998469	-0.182264	0.2461	-0.66462	0.300092
chr17:39915994	chr17:39915994	PSMD3	-0.430719	0.667235	0.998469	-0.0148582	0.0344963	-0.082471	0.0527546
chr17:39915994	chr17:39915994	RAPGEFL1	-0.182664	0.855286	0.998469	-0.0153076	0.0838021	-0.17956	0.148945
chr17:39915994	chr17:39915994	RARA	1.21084	0.227687	0.987976	0.124938	0.103182	-0.0772996	0.327175
chr17:39915994	chr17:39915994	STARD3	0.732732	0.464761	0.998469	0.0329062	0.0449089	-0.0551152	0.120928
chr17:39915994	chr17:39915994	TCAP	-0.0265415	0.978858	0.998469	-0.0038209	0.14396	-0.285982	0.27834
chr17:39915994	chr17:39915994	THRA	-1.12734	0.261237	0.987976	-0.0888329	0.078799	-0.243279	0.0656131
chr17:39915994	chr17:39915994	TOP2A	-0.227153	0.820586	0.998469	-0.0349204	0.153731	-0.336233	0.266393
chr17:39915994	chr17:39915994	WIPF2	-1.03166	0.303741	0.998469	-0.0476805	0.0462173	-0.138266	0.0429053
chr17:39916149	chr17:39916149	CASC3	-0.302851	0.762385	0.998469	-0.0150201	0.0495958	-0.112228	0.0821875
chr17:39916149	chr17:39916149	CDC6	0.485984	0.627623	0.998469	0.113023	0.232564	-0.342803	0.568848
chr17:39916149	chr17:39916149	CDK12	-0.144515	0.88527	0.998469	-0.00877509	0.0607209	-0.127788	0.110238
chr17:39916149	chr17:39916149	CSF3	0.587469	0.557692	0.998469	0.174722	0.297415	-0.408211	0.757655
chr17:39916149	chr17:39916149	ERBB2	0.827538	0.409128	0.998469	0.0421318	0.0509122	-0.0576562	0.14192
chr17:39916149	chr17:39916149	GJD3	0.381059	0.70365	0.998469	0.0494868	0.129867	-0.205052	0.304025
chr17:39916149	chr17:39916149	GRB7	0.823124	0.411626	0.998469	0.0732352	0.0889723	-0.10115	0.247621
chr17:39916149	chr17:39916149	GSDMA	1.19305	0.234561	0.987976	0.29689	0.248849	-0.190854	0.784634
chr17:39916149	chr17:39916149	GSDMB	3.12449	0.00210462	0.0955141	0.241424	0.0772683	0.089978	0.39287
chr17:39916149	chr17:39916149	IKZF3	0.027773	0.977877	0.998469	0.00459308	0.165379	-0.31955	0.328736
chr17:39916149	chr17:39916149	MED1	0.190364	0.849258	0.998469	0.0130585	0.0685974	-0.121392	0.147509
chr17:39916149	chr17:39916149	MED24	-0.516999	0.605849	0.998469	-0.0192637	0.0372607	-0.0922947	0.0537673
chr17:39916149	chr17:39916149	MIEN1	1.18401	0.238113	0.987976	0.0392555	0.0331547	-0.0257278	0.104239
chr17:39916149	chr17:39916149	MSL1	1.31766	0.189445	0.972286	0.102418	0.077727	-0.0499274	0.254762
chr17:39916149	chr17:39916149	NEUROD2	-0.324398	0.746048	0.998469	-0.0538658	0.166049	-0.379322	0.27159
chr17:39916149	chr17:39916149	NR1D1	0.176337	0.860245	0.998469	0.02345	0.132984	-0.237198	0.284098
chr17:39916149	chr17:39916149	ORMDL3	0.0511491	0.959269	0.998469	0.00205286	0.0401348	-0.0766113	0.080717
chr17:39916149	chr17:39916149	PGAP3	2.11692	0.0357662	0.548845	0.108982	0.0514813	0.00807831	0.209885
chr17:39916149	chr17:39916149	PPP1R1B	-0.74061	0.459982	0.998469	-0.182264	0.2461	-0.66462	0.300092
chr17:39916149	chr17:39916149	PSMD3	-0.430719	0.667235	0.998469	-0.0148582	0.0344963	-0.082471	0.0527546
chr17:39916149	chr17:39916149	RAPGEFL1	-0.182664	0.855286	0.998469	-0.0153076	0.0838021	-0.17956	0.148945
chr17:39916149	chr17:39916149	RARA	1.21084	0.227687	0.987976	0.124938	0.103182	-0.0772996	0.327175
chr17:39916149	chr17:39916149	STARD3	0.732732	0.464761	0.998469	0.0329062	0.0449089	-0.0551152	0.120928
chr17:39916149	chr17:39916149	TCAP	-0.0265415	0.978858	0.998469	-0.0038209	0.14396	-0.285982	0.27834
chr17:39916149	chr17:39916149	THRA	-1.12734	0.261237	0.987976	-0.0888329	0.078799	-0.243279	0.0656131
chr17:39916149	chr17:39916149	TOP2A	-0.227153	0.820586	0.998469	-0.0349204	0.153731	-0.336233	0.266393
chr17:39916149	chr17:39916149	WIPF2	-1.03166	0.303741	0.998469	-0.0476805	0.0462173	-0.138266	0.0429053
rs2872516	chr17:39916474	CASC3	0.161963	0.871533	0.998469	0.0092937	0.0573817	-0.103174	0.121762
rs2872516	chr17:39916474	CDC6	0.99958	0.318977	0.998469	0.268289	0.268402	-0.257778	0.794356
rs2872516	chr17:39916474	CDK12	-0.44317	0.658224	0.998469	-0.0311115	0.0702022	-0.168708	0.106485
rs2872516	chr17:39916474	CSF3	1.43853	0.152178	0.935437	0.492347	0.342257	-0.178478	1.16317
rs2872516	chr17:39916474	ERBB2	0.950576	0.34321	0.998469	0.0559455	0.0588543	-0.059409	0.1713
rs2872516	chr17:39916474	GJD3	0.61916	0.536665	0.998469	0.0929459	0.150116	-0.201282	0.387174
rs2872516	chr17:39916474	GRB7	0.391838	0.695684	0.998469	0.0403917	0.103083	-0.16165	0.242434
rs2872516	chr17:39916474	GSDMA	1.76267	0.0798084	0.777312	0.504851	0.286413	-0.0565193	1.06622
rs2872516	chr17:39916474	GSDMB	4.5883	8.80599e-06	0.00144486	0.397468	0.0866264	0.22768	0.567256
rs2872516	chr17:39916474	IKZF3	0.42366	0.672366	0.998469	0.0810039	0.1912	-0.293749	0.455757
rs2872516	chr17:39916474	MED1	0.348223	0.728117	0.998469	0.0276246	0.0793302	-0.127863	0.183112
rs2872516	chr17:39916474	MED24	0.531206	0.59599	0.998469	0.0228948	0.0430997	-0.0615806	0.10737
rs2872516	chr17:39916474	MIEN1	0.79366	0.428533	0.998469	0.0305093	0.0384413	-0.0448357	0.105854
rs2872516	chr17:39916474	MSL1	1.004	0.31685	0.998469	0.0904685	0.0901084	-0.0861439	0.267081
rs2872516	chr17:39916474	NEUROD2	0.164554	0.869497	0.998469	0.0316148	0.192124	-0.344948	0.408178
rs2872516	chr17:39916474	NR1D1	0.234054	0.815234	0.998469	0.0360019	0.153819	-0.265484	0.337487
rs2872516	chr17:39916474	ORMDL3	0.202959	0.839417	0.998469	0.00942152	0.0464208	-0.0815633	0.100406
rs2872516	chr17:39916474	PGAP3	2.64902	0.00885686	0.281966	0.156586	0.0591108	0.0407285	0.272443
rs2872516	chr17:39916474	PPP1R1B	-0.592366	0.554416	0.998469	-0.168734	0.284848	-0.727037	0.389568
rs2872516	chr17:39916474	PSMD3	-0.454353	0.650172	0.998469	-0.0181293	0.0399014	-0.096336	0.0600774
rs2872516	chr17:39916474	RAPGEFL1	0.327033	0.744058	0.998469	0.0316951	0.0969173	-0.158263	0.221653
rs2872516	chr17:39916474	RARA	0.335915	0.737362	0.998469	0.0402577	0.119845	-0.194639	0.275154
rs2872516	chr17:39916474	STARD3	0.498143	0.619046	0.998469	0.0259005	0.0519941	-0.076008	0.127809
rs2872516	chr17:39916474	TCAP	0.151572	0.87971	0.998469	0.0252391	0.166515	-0.301131	0.351609
rs2872516	chr17:39916474	THRA	-1.4894	0.138291	0.916586	-0.135376	0.0908928	-0.313526	0.0427741
rs2872516	chr17:39916474	TOP2A	0.661944	0.508931	0.998469	0.117576	0.177622	-0.230563	0.465715
rs2872516	chr17:39916474	WIPF2	-1.2759	0.203784	0.987976	-0.068097	0.0533717	-0.172706	0.0365116
rs9303279	chr17:39917715	CASC3	0.628269	0.530697	0.998469	0.0384644	0.0612229	-0.0815324	0.158461
rs9303279	chr17:39917715	CDC6	-0.193216	0.847027	0.998469	-0.0555539	0.287522	-0.619098	0.50799
rs9303279	chr17:39917715	CDK12	-0.0423168	0.966297	0.998469	-0.003175	0.0750293	-0.150232	0.143882
rs9303279	chr17:39917715	CSF3	1.06705	0.287508	0.991261	0.391178	0.366598	-0.327354	1.10971
rs9303279	chr17:39917715	ERBB2	1.03311	0.303065	0.998469	0.0649135	0.0628332	-0.0582395	0.188066
rs9303279	chr17:39917715	GJD3	1.67661	0.0955119	0.828158	0.266883	0.15918	-0.0451095	0.578875
rs9303279	chr17:39917715	GRB7	-0.0117869	0.99061	0.998469	-0.00129841	0.110157	-0.217206	0.214609
rs9303279	chr17:39917715	GSDMA	2.0687	0.0401341	0.582353	0.630675	0.304866	0.033139	1.22821
rs9303279	chr17:39917715	GSDMB	5.89035	2.10328e-08	4.48629e-06	0.526077	0.0893116	0.351026	0.701127
rs9303279	chr17:39917715	IKZF3	0.905784	0.366371	0.998469	0.184628	0.203832	-0.214883	0.584139
rs9303279	chr17:39917715	MED1	-0.364208	0.716169	0.998469	-0.0308602	0.0847321	-0.196935	0.135215
rs9303279	chr17:39917715	MED24	0.0708666	0.94359	0.998469	0.00326516	0.0460748	-0.0870414	0.0935718
rs9303279	chr17:39917715	MIEN1	0.633043	0.527582	0.998469	0.026011	0.0410888	-0.0545231	0.106545
rs9303279	chr17:39917715	MSL1	2.35023	0.0199445	0.383432	0.223189	0.0949647	0.0370581	0.40932
rs9303279	chr17:39917715	NEUROD2	0.477495	0.633641	0.998469	0.0979289	0.205089	-0.304045	0.499903
rs9303279	chr17:39917715	NR1D1	0.914314	0.361886	0.998469	0.149867	0.163912	-0.1714	0.471133
rs9303279	chr17:39917715	ORMDL3	-0.226266	0.821274	0.998469	-0.0112188	0.049582	-0.1084	0.0859621
rs9303279	chr17:39917715	PGAP3	3.41369	0.000806459	0.0561822	0.212687	0.0623041	0.090571	0.334803
rs9303279	chr17:39917715	PPP1R1B	-0.158629	0.874155	0.998469	-0.0483112	0.304555	-0.64524	0.548617
rs9303279	chr17:39917715	PSMD3	-0.0833653	0.933662	0.998469	-0.00355517	0.0426457	-0.0871407	0.0800304
rs9303279	chr17:39917715	RAPGEFL1	1.10417	0.271127	0.990265	0.113921	0.103173	-0.088299	0.316141
rs9303279	chr17:39917715	RARA	1.93065	0.055241	0.717102	0.244482	0.126632	-0.00371677	0.49268
rs9303279	chr17:39917715	STARD3	0.392045	0.695531	0.998469	0.0217791	0.0555524	-0.0871037	0.130662
rs9303279	chr17:39917715	TCAP	1.92262	0.0562504	0.717102	0.338214	0.175913	-0.00657569	0.683004
rs9303279	chr17:39917715	THRA	-1.3211	0.188296	0.972286	-0.128442	0.0972231	-0.318999	0.0621155
rs9303279	chr17:39917715	TOP2A	-0.407566	0.684121	0.998469	-0.0773885	0.18988	-0.449553	0.294776
rs9303279	chr17:39917715	WIPF2	0.553058	0.580972	0.998469	0.0316546	0.0572355	-0.080527	0.143836
chr17:39917778	chr17:39917778	CASC3	-0.136963	0.891227	0.998469	-0.0060167	0.0439293	-0.0921182	0.0800848
chr17:39917778	chr17:39917778	CDC6	1.94076	0.0539921	0.717102	0.395491	0.203782	-0.00392134	0.794904
chr17:39917778	chr17:39917778	CDK12	-0.548952	0.58378	0.998469	-0.0294929	0.0537259	-0.134796	0.0758098
chr17:39917778	chr17:39917778	CSF3	0.753465	0.452244	0.998469	0.198311	0.263199	-0.317559	0.714181
chr17:39917778	chr17:39917778	ERBB2	0.426596	0.67023	0.998469	0.0192625	0.045154	-0.0692393	0.107764
chr17:39917778	chr17:39917778	GJD3	-0.355972	0.722316	0.998469	-0.0409404	0.11501	-0.26636	0.184479
chr17:39917778	chr17:39917778	GRB7	0.631795	0.528396	0.998469	0.0498207	0.0788558	-0.104737	0.204378
chr17:39917778	chr17:39917778	GSDMA	1.25599	0.210894	0.987976	0.276653	0.220267	-0.155069	0.708376
chr17:39917778	chr17:39917778	GSDMB	2.82238	0.00535318	0.190077	0.194122	0.0687795	0.0593143	0.32893
chr17:39917778	chr17:39917778	IKZF3	-0.072202	0.942529	0.998469	-0.010574	0.14645	-0.297616	0.276468
chr17:39917778	chr17:39917778	MED1	0.105243	0.916311	0.998469	0.00639364	0.0607511	-0.112679	0.125466
chr17:39917778	chr17:39917778	MED24	-1.44916	0.149192	0.922393	-0.0475538	0.0328148	-0.111871	0.0167632
chr17:39917778	chr17:39917778	MIEN1	0.0387788	0.969114	0.998469	0.00114338	0.0294846	-0.0566464	0.0589331
chr17:39917778	chr17:39917778	MSL1	0.444443	0.657305	0.998469	0.0307337	0.0691511	-0.104802	0.16627
chr17:39917778	chr17:39917778	NEUROD2	-0.218692	0.82716	0.998469	-0.0321632	0.14707	-0.320421	0.256095
chr17:39917778	chr17:39917778	NR1D1	0.220342	0.825877	0.998469	0.025947	0.117758	-0.204858	0.256752
chr17:39917778	chr17:39917778	ORMDL3	0.236407	0.81341	0.998469	0.00840087	0.0355357	-0.0612491	0.0780508
chr17:39917778	chr17:39917778	PGAP3	2.52047	0.0126693	0.330975	0.114277	0.0453397	0.0254114	0.203143
chr17:39917778	chr17:39917778	PPP1R1B	-0.667642	0.505295	0.998469	-0.145547	0.218002	-0.57283	0.281736
chr17:39917778	chr17:39917778	PSMD3	0.417159	0.677105	0.998469	0.0127439	0.0305493	-0.0471328	0.0726206
chr17:39917778	chr17:39917778	RAPGEFL1	-0.316252	0.752211	0.998469	-0.0234646	0.0741961	-0.168889	0.12196
chr17:39917778	chr17:39917778	RARA	0.970125	0.333404	0.998469	0.0887836	0.0915177	-0.0905911	0.268158
chr17:39917778	chr17:39917778	STARD3	1.6461	0.101647	0.842124	0.0650385	0.0395107	-0.0124025	0.142479
chr17:39917778	chr17:39917778	TCAP	-1.01889	0.309747	0.998469	-0.129485	0.127085	-0.378572	0.119601
chr17:39917778	chr17:39917778	THRA	-0.635933	0.525701	0.998469	-0.0444918	0.0699631	-0.181619	0.0926358
chr17:39917778	chr17:39917778	TOP2A	0.244576	0.807089	0.998469	0.0332949	0.136133	-0.233527	0.300116
chr17:39917778	chr17:39917778	WIPF2	-1.13074	0.259805	0.987976	-0.0462489	0.0409014	-0.126416	0.0339178
chr17:39917793	chr17:39917793	CASC3	-1.38063	0.16926	0.94622	-0.053887	0.0390307	-0.130387	0.0226132
chr17:39917793	chr17:39917793	CDC6	0.0319483	0.974552	0.998469	0.00588348	0.184157	-0.355063	0.36683
chr17:39917793	chr17:39917793	CDK12	0.868572	0.386343	0.998469	0.0416406	0.0479414	-0.0523246	0.135606
chr17:39917793	chr17:39917793	CSF3	0.154519	0.87739	0.998469	0.0363999	0.23557	-0.425317	0.498117
chr17:39917793	chr17:39917793	ERBB2	-1.53809	0.125942	0.898459	-0.061652	0.0400835	-0.140216	0.0169116
chr17:39917793	chr17:39917793	GJD3	0.465684	0.642056	0.998469	0.0478442	0.10274	-0.153526	0.249214
chr17:39917793	chr17:39917793	GRB7	-0.260656	0.794683	0.998469	-0.0183847	0.0705327	-0.156629	0.119859
chr17:39917793	chr17:39917793	GSDMA	-2.0467	0.0422745	0.593233	-0.399711	0.195296	-0.78249	-0.0169313
chr17:39917793	chr17:39917793	GSDMB	1.49565	0.136655	0.916586	0.0934813	0.0625021	-0.0290228	0.215985
chr17:39917793	chr17:39917793	IKZF3	-0.676823	0.499466	0.998469	-0.0884485	0.130682	-0.344585	0.167688
chr17:39917793	chr17:39917793	MED1	-2.24969	0.025791	0.443497	-0.120296	0.0534724	-0.225102	-0.0154903
chr17:39917793	chr17:39917793	MED24	-1.07499	0.283947	0.991261	-0.0316103	0.0294051	-0.0892442	0.0260237
chr17:39917793	chr17:39917793	MIEN1	1.21097	0.22764	0.987976	0.0317635	0.0262299	-0.0196471	0.0831741
chr17:39917793	chr17:39917793	MSL1	-0.0223715	0.982179	0.998469	-0.00138317	0.0618272	-0.122564	0.119798
chr17:39917793	chr17:39917793	NEUROD2	-0.23546	0.814144	0.998469	-0.0309424	0.131412	-0.288511	0.226626
chr17:39917793	chr17:39917793	NR1D1	-0.674168	0.501148	0.998469	-0.0708509	0.105094	-0.276835	0.135133
chr17:39917793	chr17:39917793	ORMDL3	-0.073229	0.941713	0.998469	-0.0023256	0.031758	-0.0645712	0.05992
chr17:39917793	chr17:39917793	PGAP3	0.475491	0.635066	0.998469	0.0196177	0.0412578	-0.0612476	0.100483
chr17:39917793	chr17:39917793	PPP1R1B	0.227917	0.819993	0.998469	0.0444504	0.195029	-0.337806	0.426707
chr17:39917793	chr17:39917793	PSMD3	-0.126733	0.899306	0.998469	-0.00346116	0.0273106	-0.0569899	0.0500676
chr17:39917793	chr17:39917793	RAPGEFL1	-0.562918	0.574255	0.998469	-0.037296	0.0662548	-0.167155	0.0925635
chr17:39917793	chr17:39917793	RARA	0.151123	0.880063	0.998469	0.0123926	0.0820033	-0.148334	0.173119
chr17:39917793	chr17:39917793	STARD3	-0.746057	0.456694	0.998469	-0.0265103	0.0355338	-0.0961565	0.043136
chr17:39917793	chr17:39917793	TCAP	-1.49274	0.137414	0.916586	-0.168908	0.113152	-0.390686	0.0528713
chr17:39917793	chr17:39917793	THRA	-2.51354	0.0129114	0.330975	-0.1544	0.0614275	-0.274798	-0.0340024
chr17:39917793	chr17:39917793	TOP2A	0.00902176	0.992813	0.998469	0.00109763	0.121665	-0.237365	0.239561
chr17:39917793	chr17:39917793	WIPF2	-0.598827	0.55011	0.998469	-0.0219465	0.0366492	-0.0937789	0.0498859
chr17:39918265	chr17:39918265	CASC3	-0.407805	0.683945	0.998469	-0.0153911	0.0377413	-0.0893639	0.0585818
chr17:39918265	chr17:39918265	CDC6	0.00250932	0.998001	0.998469	0.000444508	0.177143	-0.346755	0.347644
chr17:39918265	chr17:39918265	CDK12	0.651723	0.515487	0.998469	0.0300844	0.0461612	-0.0603917	0.12056
chr17:39918265	chr17:39918265	CSF3	0.0842559	0.932955	0.998469	0.0190931	0.226609	-0.42506	0.463246
chr17:39918265	chr17:39918265	ERBB2	-0.359854	0.719416	0.998469	-0.0139684	0.0388169	-0.0900496	0.0621127
chr17:39918265	chr17:39918265	GJD3	0.2398	0.810783	0.998469	0.02371	0.0988741	-0.170083	0.217503
chr17:39918265	chr17:39918265	GRB7	0.352826	0.724669	0.998469	0.0239338	0.0678345	-0.109022	0.156889
chr17:39918265	chr17:39918265	GSDMA	-1.87237	0.0629247	0.717102	-0.35245	0.188237	-0.721395	0.016495
chr17:39918265	chr17:39918265	GSDMB	2.20636	0.0287401	0.462296	0.131618	0.059654	0.0146964	0.24854
chr17:39918265	chr17:39918265	IKZF3	-0.267423	0.789477	0.998469	-0.0336556	0.125851	-0.280324	0.213013
chr17:39918265	chr17:39918265	MED1	-1.16745	0.244711	0.987976	-0.0607125	0.0520042	-0.162641	0.0412158
chr17:39918265	chr17:39918265	MED24	-0.84429	0.39973	0.998469	-0.0239127	0.0283228	-0.0794254	0.0316001
chr17:39918265	chr17:39918265	MIEN1	0.163028	0.870696	0.998469	0.00413123	0.0253407	-0.0455364	0.0537989
chr17:39918265	chr17:39918265	MSL1	0.226216	0.821314	0.998469	0.0134515	0.0594631	-0.103096	0.129999
chr17:39918265	chr17:39918265	NEUROD2	-0.210821	0.833287	0.998469	-0.0266502	0.126411	-0.274416	0.221116
chr17:39918265	chr17:39918265	NR1D1	-0.693056	0.489249	0.998469	-0.0700562	0.101083	-0.268179	0.128067
chr17:39918265	chr17:39918265	ORMDL3	0.398105	0.691067	0.998469	0.0121558	0.0305341	-0.0476911	0.0720027
chr17:39918265	chr17:39918265	PGAP3	1.38364	0.168338	0.94622	0.0546331	0.0394851	-0.0227576	0.132024
chr17:39918265	chr17:39918265	PPP1R1B	0.672158	0.502423	0.998469	0.125945	0.187373	-0.241307	0.493196
chr17:39918265	chr17:39918265	PSMD3	-0.0213809	0.982968	0.998469	-0.00056171	0.0262716	-0.052054	0.0509306
chr17:39918265	chr17:39918265	RAPGEFL1	-0.689855	0.491254	0.998469	-0.0439442	0.0637006	-0.168797	0.0809089
chr17:39918265	chr17:39918265	RARA	0.466193	0.641692	0.998469	0.0367516	0.0788334	-0.117762	0.191265
chr17:39918265	chr17:39918265	STARD3	-0.0565167	0.954999	0.998469	-0.001935	0.0342376	-0.0690407	0.0651707
chr17:39918265	chr17:39918265	TCAP	-0.544346	0.586938	0.998469	-0.0595932	0.109477	-0.274168	0.154981
chr17:39918265	chr17:39918265	THRA	-2.27614	0.0241234	0.421763	-0.13494	0.0592848	-0.251139	-0.0187422
chr17:39918265	chr17:39918265	TOP2A	0.184269	0.854029	0.998469	0.0215629	0.117019	-0.207793	0.250919
chr17:39918265	chr17:39918265	WIPF2	-0.862448	0.389693	0.998469	-0.0303687	0.0352122	-0.0993847	0.0386472
chr17:39918967	chr17:39918967	CASC3	1.88265	0.0615076	0.717102	0.134436	0.0714075	-0.00552313	0.274394
chr17:39918967	chr17:39918967	CDC6	-0.00921561	0.992658	0.998469	-0.00312012	0.338569	-0.666715	0.660475
chr17:39918967	chr17:39918967	CDK12	-0.124415	0.901138	0.998469	-0.0109904	0.0883364	-0.18413	0.162149
chr17:39918967	chr17:39918967	CSF3	-0.265223	0.791168	0.998469	-0.11485	0.43303	-0.963588	0.733889
chr17:39918967	chr17:39918967	ERBB2	2.36148	0.019369	0.382537	0.172378	0.0729958	0.0293067	0.31545
chr17:39918967	chr17:39918967	GJD3	-0.491178	0.623953	0.998469	-0.0927694	0.188871	-0.462957	0.277418
chr17:39918967	chr17:39918967	GRB7	1.32555	0.186823	0.972286	0.171015	0.129014	-0.0818538	0.423883
chr17:39918967	chr17:39918967	GSDMA	0.55566	0.579196	0.998469	0.201836	0.363236	-0.510107	0.913779
chr17:39918967	chr17:39918967	GSDMB	1.47856	0.141163	0.916586	0.169926	0.114926	-0.0553296	0.395181
chr17:39918967	chr17:39918967	IKZF3	0.798987	0.425446	0.998469	0.191857	0.240125	-0.278788	0.662502
chr17:39918967	chr17:39918967	MED1	1.58427	0.115048	0.895608	0.156928	0.0990537	-0.0372177	0.351073
chr17:39918967	chr17:39918967	MED24	0.151341	0.879892	0.998469	0.0082096	0.0542458	-0.0981123	0.114531
chr17:39918967	chr17:39918967	MIEN1	-1.90232	0.0588719	0.717102	-0.0911483	0.0479144	-0.18506	0.00276386
chr17:39918967	chr17:39918967	MSL1	0.517923	0.605206	0.998469	0.0588236	0.113576	-0.163785	0.281432
chr17:39918967	chr17:39918967	NEUROD2	0.0328556	0.973829	0.998469	0.0079392	0.241639	-0.465673	0.481552
chr17:39918967	chr17:39918967	NR1D1	-0.123615	0.901771	0.998469	-0.0239158	0.19347	-0.403117	0.355285
chr17:39918967	chr17:39918967	ORMDL3	1.07932	0.28202	0.991261	0.0627973	0.0581823	-0.0512399	0.176835
chr17:39918967	chr17:39918967	PGAP3	1.92009	0.0565715	0.717102	0.14414	0.0750695	-0.00299601	0.291276
chr17:39918967	chr17:39918967	PPP1R1B	0.925789	0.355908	0.998469	0.331141	0.357685	-0.369922	1.0322
chr17:39918967	chr17:39918967	PSMD3	-0.0362418	0.971133	0.998469	-0.00181978	0.0502122	-0.100236	0.0965961
chr17:39918967	chr17:39918967	RAPGEFL1	0.00925641	0.992626	0.998469	0.00112859	0.121925	-0.237844	0.240102
chr17:39918967	chr17:39918967	RARA	0.546365	0.585553	0.998469	0.082302	0.150636	-0.212944	0.377548
chr17:39918967	chr17:39918967	STARD3	1.29056	0.198663	0.974132	0.0840288	0.0651105	-0.0435877	0.211645
chr17:39918967	chr17:39918967	TCAP	1.71053	0.0890469	0.810142	0.3551	0.207596	-0.0517885	0.761988
chr17:39918967	chr17:39918967	THRA	0.393316	0.694594	0.998469	0.0452396	0.115021	-0.180202	0.270681
chr17:39918967	chr17:39918967	TOP2A	0.39756	0.691468	0.998469	0.088883	0.223571	-0.349316	0.527082
chr17:39918967	chr17:39918967	WIPF2	-0.341507	0.733157	0.998469	-0.0230272	0.0674281	-0.155186	0.109132
chr17:39919173	chr17:39919173	CASC3	-0.407805	0.683945	0.998469	-0.0153911	0.0377413	-0.0893639	0.0585818
chr17:39919173	chr17:39919173	CDC6	0.00250932	0.998001	0.998469	0.000444508	0.177143	-0.346755	0.347644
chr17:39919173	chr17:39919173	CDK12	0.651723	0.515487	0.998469	0.0300844	0.0461612	-0.0603917	0.12056
chr17:39919173	chr17:39919173	CSF3	0.0842559	0.932955	0.998469	0.0190931	0.226609	-0.42506	0.463246
chr17:39919173	chr17:39919173	ERBB2	-0.359854	0.719416	0.998469	-0.0139684	0.0388169	-0.0900496	0.0621127
chr17:39919173	chr17:39919173	GJD3	0.2398	0.810783	0.998469	0.02371	0.0988741	-0.170083	0.217503
chr17:39919173	chr17:39919173	GRB7	0.352826	0.724669	0.998469	0.0239338	0.0678345	-0.109022	0.156889
chr17:39919173	chr17:39919173	GSDMA	-1.87237	0.0629247	0.717102	-0.35245	0.188237	-0.721395	0.016495
chr17:39919173	chr17:39919173	GSDMB	2.20636	0.0287401	0.462296	0.131618	0.059654	0.0146964	0.24854
chr17:39919173	chr17:39919173	IKZF3	-0.267423	0.789477	0.998469	-0.0336556	0.125851	-0.280324	0.213013
chr17:39919173	chr17:39919173	MED1	-1.16745	0.244711	0.987976	-0.0607125	0.0520042	-0.162641	0.0412158
chr17:39919173	chr17:39919173	MED24	-0.84429	0.39973	0.998469	-0.0239127	0.0283228	-0.0794254	0.0316001
chr17:39919173	chr17:39919173	MIEN1	0.163028	0.870696	0.998469	0.00413123	0.0253407	-0.0455364	0.0537989
chr17:39919173	chr17:39919173	MSL1	0.226216	0.821314	0.998469	0.0134515	0.0594631	-0.103096	0.129999
chr17:39919173	chr17:39919173	NEUROD2	-0.210821	0.833287	0.998469	-0.0266502	0.126411	-0.274416	0.221116
chr17:39919173	chr17:39919173	NR1D1	-0.693056	0.489249	0.998469	-0.0700562	0.101083	-0.268179	0.128067
chr17:39919173	chr17:39919173	ORMDL3	0.398105	0.691067	0.998469	0.0121558	0.0305341	-0.0476911	0.0720027
chr17:39919173	chr17:39919173	PGAP3	1.38364	0.168338	0.94622	0.0546331	0.0394851	-0.0227576	0.132024
chr17:39919173	chr17:39919173	PPP1R1B	0.672158	0.502423	0.998469	0.125945	0.187373	-0.241307	0.493196
chr17:39919173	chr17:39919173	PSMD3	-0.0213809	0.982968	0.998469	-0.00056171	0.0262716	-0.052054	0.0509306
chr17:39919173	chr17:39919173	RAPGEFL1	-0.689855	0.491254	0.998469	-0.0439442	0.0637006	-0.168797	0.0809089
chr17:39919173	chr17:39919173	RARA	0.466193	0.641692	0.998469	0.0367516	0.0788334	-0.117762	0.191265
chr17:39919173	chr17:39919173	STARD3	-0.0565167	0.954999	0.998469	-0.001935	0.0342376	-0.0690407	0.0651707
chr17:39919173	chr17:39919173	TCAP	-0.544346	0.586938	0.998469	-0.0595932	0.109477	-0.274168	0.154981
chr17:39919173	chr17:39919173	THRA	-2.27614	0.0241234	0.421763	-0.13494	0.0592848	-0.251139	-0.0187422
chr17:39919173	chr17:39919173	TOP2A	0.184269	0.854029	0.998469	0.0215629	0.117019	-0.207793	0.250919
chr17:39919173	chr17:39919173	WIPF2	-0.862448	0.389693	0.998469	-0.0303687	0.0352122	-0.0993847	0.0386472
chr17:39919884	chr17:39919884	CASC3	-0.407805	0.683945	0.998469	-0.0153911	0.0377413	-0.0893639	0.0585818
chr17:39919884	chr17:39919884	CDC6	0.00250932	0.998001	0.998469	0.000444508	0.177143	-0.346755	0.347644
chr17:39919884	chr17:39919884	CDK12	0.651723	0.515487	0.998469	0.0300844	0.0461612	-0.0603917	0.12056
chr17:39919884	chr17:39919884	CSF3	0.0842559	0.932955	0.998469	0.0190931	0.226609	-0.42506	0.463246
chr17:39919884	chr17:39919884	ERBB2	-0.359854	0.719416	0.998469	-0.0139684	0.0388169	-0.0900496	0.0621127
chr17:39919884	chr17:39919884	GJD3	0.2398	0.810783	0.998469	0.02371	0.0988741	-0.170083	0.217503
chr17:39919884	chr17:39919884	GRB7	0.352826	0.724669	0.998469	0.0239338	0.0678345	-0.109022	0.156889
chr17:39919884	chr17:39919884	GSDMA	-1.87237	0.0629247	0.717102	-0.35245	0.188237	-0.721395	0.016495
chr17:39919884	chr17:39919884	GSDMB	2.20636	0.0287401	0.462296	0.131618	0.059654	0.0146964	0.24854
chr17:39919884	chr17:39919884	IKZF3	-0.267423	0.789477	0.998469	-0.0336556	0.125851	-0.280324	0.213013
chr17:39919884	chr17:39919884	MED1	-1.16745	0.244711	0.987976	-0.0607125	0.0520042	-0.162641	0.0412158
chr17:39919884	chr17:39919884	MED24	-0.84429	0.39973	0.998469	-0.0239127	0.0283228	-0.0794254	0.0316001
chr17:39919884	chr17:39919884	MIEN1	0.163028	0.870696	0.998469	0.00413123	0.0253407	-0.0455364	0.0537989
chr17:39919884	chr17:39919884	MSL1	0.226216	0.821314	0.998469	0.0134515	0.0594631	-0.103096	0.129999
chr17:39919884	chr17:39919884	NEUROD2	-0.210821	0.833287	0.998469	-0.0266502	0.126411	-0.274416	0.221116
chr17:39919884	chr17:39919884	NR1D1	-0.693056	0.489249	0.998469	-0.0700562	0.101083	-0.268179	0.128067
chr17:39919884	chr17:39919884	ORMDL3	0.398105	0.691067	0.998469	0.0121558	0.0305341	-0.0476911	0.0720027
chr17:39919884	chr17:39919884	PGAP3	1.38364	0.168338	0.94622	0.0546331	0.0394851	-0.0227576	0.132024
chr17:39919884	chr17:39919884	PPP1R1B	0.672158	0.502423	0.998469	0.125945	0.187373	-0.241307	0.493196
chr17:39919884	chr17:39919884	PSMD3	-0.0213809	0.982968	0.998469	-0.00056171	0.0262716	-0.052054	0.0509306
chr17:39919884	chr17:39919884	RAPGEFL1	-0.689855	0.491254	0.998469	-0.0439442	0.0637006	-0.168797	0.0809089
chr17:39919884	chr17:39919884	RARA	0.466193	0.641692	0.998469	0.0367516	0.0788334	-0.117762	0.191265
chr17:39919884	chr17:39919884	STARD3	-0.0565167	0.954999	0.998469	-0.001935	0.0342376	-0.0690407	0.0651707
chr17:39919884	chr17:39919884	TCAP	-0.544346	0.586938	0.998469	-0.0595932	0.109477	-0.274168	0.154981
chr17:39919884	chr17:39919884	THRA	-2.27614	0.0241234	0.421763	-0.13494	0.0592848	-0.251139	-0.0187422
chr17:39919884	chr17:39919884	TOP2A	0.184269	0.854029	0.998469	0.0215629	0.117019	-0.207793	0.250919
chr17:39919884	chr17:39919884	WIPF2	-0.862448	0.389693	0.998469	-0.0303687	0.0352122	-0.0993847	0.0386472
rs73985226	chr17:39920081	CASC3	1.10528	0.270645	0.990265	0.0579894	0.0524655	-0.0448431	0.160822
rs73985226	chr17:39920081	CDC6	1.26444	0.207856	0.987976	0.310862	0.24585	-0.171004	0.792728
rs73985226	chr17:39920081	CDK12	-1.40434	0.162098	0.94622	-0.0899845	0.0640762	-0.215574	0.0356048
rs73985226	chr17:39920081	CSF3	0.102802	0.918245	0.998469	0.0324874	0.316019	-0.58691	0.651885
rs73985226	chr17:39920081	ERBB2	0.532942	0.594791	0.998469	0.0288363	0.0541077	-0.0772148	0.134887
rs73985226	chr17:39920081	GJD3	-0.799408	0.425203	0.998469	-0.110034	0.137645	-0.379818	0.159749
rs73985226	chr17:39920081	GRB7	-0.321055	0.748575	0.998469	-0.0303738	0.0946063	-0.215802	0.155054
rs73985226	chr17:39920081	GSDMA	3.21713	0.00155858	0.0791538	0.827884	0.257336	0.323504	1.33226
rs73985226	chr17:39920081	GSDMB	0.109142	0.913223	0.998469	0.00921234	0.084407	-0.156225	0.17465
rs73985226	chr17:39920081	IKZF3	0.855291	0.39363	0.998469	0.149812	0.175159	-0.1935	0.493123
rs73985226	chr17:39920081	MED1	0.868158	0.386569	0.998469	0.0630776	0.0726568	-0.0793297	0.205485
rs73985226	chr17:39920081	MED24	-0.733822	0.464099	0.998469	-0.0289999	0.039519	-0.106457	0.0484573
rs73985226	chr17:39920081	MIEN1	-0.0783439	0.937649	0.998469	-0.00276879	0.0353416	-0.0720382	0.0665006
rs73985226	chr17:39920081	MSL1	-0.255704	0.798498	0.998469	-0.0212035	0.082922	-0.183731	0.141324
rs73985226	chr17:39920081	NEUROD2	-0.0643019	0.948808	0.998469	-0.0113371	0.176311	-0.356907	0.334233
rs73985226	chr17:39920081	NR1D1	1.51289	0.13222	0.916586	0.212113	0.140204	-0.0626861	0.486912
rs73985226	chr17:39920081	ORMDL3	-0.305639	0.760264	0.998469	-0.0130173	0.0425905	-0.0964946	0.07046
rs73985226	chr17:39920081	PGAP3	1.63938	0.103039	0.84532	0.0900638	0.0549377	-0.0176141	0.197742
rs73985226	chr17:39920081	PPP1R1B	-0.970727	0.333105	0.998469	-0.253281	0.260919	-0.764683	0.25812
rs73985226	chr17:39920081	PSMD3	-0.802955	0.423156	0.998469	-0.0293611	0.0365663	-0.101031	0.0423088
rs73985226	chr17:39920081	RAPGEFL1	0.826129	0.409924	0.998469	0.0733434	0.0887797	-0.100665	0.247352
rs73985226	chr17:39920081	RARA	1.41034	0.160322	0.94622	0.154226	0.109354	-0.0601077	0.36856
rs73985226	chr17:39920081	STARD3	0.313022	0.754659	0.998469	0.0149415	0.0477331	-0.0786154	0.108498
rs73985226	chr17:39920081	TCAP	0.81522	0.416121	0.998469	0.124324	0.152503	-0.174583	0.423231
rs73985226	chr17:39920081	THRA	1.45997	0.146199	0.922393	0.121802	0.0834277	-0.0417161	0.28532
rs73985226	chr17:39920081	TOP2A	0.440164	0.660394	0.998469	0.071796	0.163112	-0.247903	0.391495
rs73985226	chr17:39920081	WIPF2	0.284338	0.776508	0.998469	0.0139907	0.0492045	-0.0824501	0.110432
rs73985227	chr17:39921437	CASC3	1.09647	0.274469	0.991261	0.0572735	0.0522342	-0.0451056	0.159653
rs73985227	chr17:39921437	CDC6	1.21431	0.226365	0.987976	0.297315	0.244843	-0.182577	0.777207
rs73985227	chr17:39921437	CDK12	-1.11424	0.266798	0.988391	-0.0712331	0.06393	-0.196536	0.0540697
rs73985227	chr17:39921437	CSF3	0.00291455	0.997678	0.998469	0.000916968	0.314617	-0.615733	0.617567
rs73985227	chr17:39921437	ERBB2	0.297182	0.766701	0.998469	0.0160175	0.0538979	-0.0896224	0.121657
rs73985227	chr17:39921437	GJD3	-0.616844	0.538188	0.998469	-0.0845922	0.137137	-0.353381	0.184196
rs73985227	chr17:39921437	GRB7	-0.352651	0.7248	0.998469	-0.0332118	0.0941776	-0.2178	0.151376
rs73985227	chr17:39921437	GSDMA	3.50501	0.000587994	0.05453	0.893023	0.254785	0.393645	1.3924
rs73985227	chr17:39921437	GSDMB	0.468277	0.640204	0.998469	0.0393246	0.0839772	-0.125271	0.20392
rs73985227	chr17:39921437	IKZF3	1.16402	0.246098	0.987976	0.202596	0.174049	-0.13854	0.543733
rs73985227	chr17:39921437	MED1	1.05478	0.293066	0.998469	0.0762125	0.0722541	-0.0654055	0.21783
rs73985227	chr17:39921437	MED24	-0.830177	0.407639	0.998469	-0.0326463	0.0393246	-0.109722	0.0444298
rs73985227	chr17:39921437	MIEN1	-0.149342	0.881466	0.998469	-0.00525415	0.035182	-0.0742108	0.0637025
rs73985227	chr17:39921437	MSL1	-0.34722	0.728868	0.998469	-0.0286588	0.0825378	-0.190433	0.133115
rs73985227	chr17:39921437	NEUROD2	-0.384192	0.701331	0.998469	-0.0674055	0.175447	-0.411282	0.276471
rs73985227	chr17:39921437	NR1D1	1.49569	0.136643	0.916586	0.208797	0.139599	-0.0648164	0.482411
rs73985227	chr17:39921437	ORMDL3	-0.0441313	0.964853	0.998469	-0.00187169	0.0424119	-0.0849991	0.0812557
rs73985227	chr17:39921437	PGAP3	1.213	0.226865	0.987976	0.0665834	0.0548917	-0.0410043	0.174171
rs73985227	chr17:39921437	PPP1R1B	-0.833218	0.405926	0.998469	-0.216593	0.259948	-0.726091	0.292905
rs73985227	chr17:39921437	PSMD3	-0.313432	0.754349	0.998469	-0.0114287	0.0364631	-0.0828964	0.060039
rs73985227	chr17:39921437	RAPGEFL1	0.541008	0.589232	0.998469	0.0478723	0.0884872	-0.125563	0.221307
rs73985227	chr17:39921437	RARA	1.25147	0.212534	0.987976	0.136415	0.109004	-0.0772323	0.350062
rs73985227	chr17:39921437	STARD3	0.355504	0.722666	0.998469	0.0168921	0.0475158	-0.0762389	0.110023
rs73985227	chr17:39921437	TCAP	0.925626	0.355992	0.998469	0.140449	0.151734	-0.15695	0.437848
rs73985227	chr17:39921437	THRA	1.33535	0.1836	0.972286	0.111024	0.0831417	-0.0519342	0.273981
rs73985227	chr17:39921437	TOP2A	0.667788	0.505202	0.998469	0.108355	0.162259	-0.209674	0.426383
rs73985227	chr17:39921437	WIPF2	0.487737	0.626384	0.998469	0.0238803	0.0489614	-0.0720841	0.119845
chr17:39921497	chr17:39921497	CASC3	2.24106	0.0263565	0.443497	0.140317	0.0626118	0.0175974	0.263036
chr17:39921497	chr17:39921497	CDC6	0.473767	0.636292	0.998469	0.141164	0.297961	-0.44284	0.725169
chr17:39921497	chr17:39921497	CDK12	-0.41518	0.678549	0.998469	-0.0322833	0.0777573	-0.184688	0.120121
chr17:39921497	chr17:39921497	CSF3	0.598601	0.55026	0.998469	0.228079	0.381019	-0.518719	0.974877
chr17:39921497	chr17:39921497	ERBB2	2.06342	0.0406388	0.585694	0.133162	0.0645344	0.00667427	0.259649
chr17:39921497	chr17:39921497	GJD3	-0.235317	0.814255	0.998469	-0.0391625	0.166425	-0.365355	0.28703
chr17:39921497	chr17:39921497	GRB7	0.543055	0.587825	0.998469	0.061973	0.114119	-0.161701	0.285647
chr17:39921497	chr17:39921497	GSDMA	0.903274	0.367697	0.998469	0.288504	0.319398	-0.337516	0.914524
chr17:39921497	chr17:39921497	GSDMB	2.22213	0.0276345	0.460503	0.223075	0.100388	0.0263146	0.419836
chr17:39921497	chr17:39921497	IKZF3	1.14013	0.255886	0.987976	0.240621	0.211047	-0.173032	0.654274
chr17:39921497	chr17:39921497	MED1	1.53727	0.126143	0.898459	0.134159	0.0872708	-0.0368921	0.30521
chr17:39921497	chr17:39921497	MED24	1.391	0.166097	0.94622	0.0660696	0.0474977	-0.027026	0.159165
chr17:39921497	chr17:39921497	MIEN1	-2.32768	0.0211434	0.399104	-0.0976994	0.0419729	-0.179966	-0.0154325
chr17:39921497	chr17:39921497	MSL1	-0.114989	0.908594	0.998469	-0.0115103	0.100099	-0.207704	0.184684
chr17:39921497	chr17:39921497	NEUROD2	0.627388	0.531272	0.998469	0.133351	0.212549	-0.283245	0.549947
chr17:39921497	chr17:39921497	NR1D1	-0.0755726	0.939851	0.998469	-0.0128765	0.170386	-0.346833	0.32108
chr17:39921497	chr17:39921497	ORMDL3	1.11053	0.268386	0.990265	0.0568905	0.0512282	-0.0435168	0.157298
chr17:39921497	chr17:39921497	PGAP3	1.88992	0.0605227	0.717102	0.124986	0.0661332	-0.00463484	0.254607
chr17:39921497	chr17:39921497	PPP1R1B	1.1092	0.268958	0.990265	0.349004	0.314645	-0.2677	0.965708
chr17:39921497	chr17:39921497	PSMD3	0.0166923	0.986702	0.998469	0.000738134	0.04422	-0.085933	0.0874093
chr17:39921497	chr17:39921497	RAPGEFL1	0.604903	0.546074	0.998469	0.0648792	0.107256	-0.145342	0.2751
chr17:39921497	chr17:39921497	RARA	-0.692802	0.489408	0.998469	-0.0918557	0.132586	-0.351724	0.168013
chr17:39921497	chr17:39921497	STARD3	0.746182	0.456619	0.998469	0.0429292	0.0575318	-0.0698332	0.155692
chr17:39921497	chr17:39921497	TCAP	1.71003	0.0891393	0.810142	0.312632	0.182822	-0.0456994	0.670964
chr17:39921497	chr17:39921497	THRA	0.146396	0.883787	0.998469	0.0148351	0.101335	-0.183782	0.213452
chr17:39921497	chr17:39921497	TOP2A	1.38099	0.16915	0.94622	0.270475	0.195856	-0.113402	0.654352
chr17:39921497	chr17:39921497	WIPF2	-0.389538	0.697381	0.998469	-0.0231288	0.0593749	-0.139504	0.093246
chr17:39922412	chr17:39922412	CASC3	0.0813333	0.935275	0.998469	0.00568236	0.0698651	-0.131253	0.142618
chr17:39922412	chr17:39922412	CDC6	1.03636	0.30155	0.998469	0.338578	0.326699	-0.301752	0.978909
chr17:39922412	chr17:39922412	CDK12	0.0585505	0.953381	0.998469	0.00500721	0.0855195	-0.162611	0.172626
chr17:39922412	chr17:39922412	CSF3	-0.860841	0.390575	0.998469	-0.360139	0.418357	-1.18012	0.459841
chr17:39922412	chr17:39922412	ERBB2	-1.84001	0.0675633	0.728937	-0.130869	0.0711238	-0.270271	0.00853408
chr17:39922412	chr17:39922412	GJD3	0.624221	0.533345	0.998469	0.114082	0.18276	-0.244127	0.472291
chr17:39922412	chr17:39922412	GRB7	-2.17414	0.0311189	0.488064	-0.269156	0.123798	-0.511801	-0.0265106
chr17:39922412	chr17:39922412	GSDMA	-0.546175	0.585684	0.998469	-0.192063	0.351652	-0.881301	0.497174
chr17:39922412	chr17:39922412	GSDMB	-1.73699	0.0842544	0.798732	-0.192775	0.110982	-0.4103	0.0247497
chr17:39922412	chr17:39922412	IKZF3	-1.25866	0.209931	0.987976	-0.291756	0.231799	-0.746082	0.162569
chr17:39922412	chr17:39922412	MED1	0.384367	0.701201	0.998469	0.0371203	0.096575	-0.152167	0.226407
chr17:39922412	chr17:39922412	MED24	-0.481522	0.630784	0.998469	-0.0252707	0.0524809	-0.128133	0.0775919
chr17:39922412	chr17:39922412	MIEN1	2.74288	0.00676347	0.232685	0.12578	0.0458569	0.0359004	0.21566
chr17:39922412	chr17:39922412	MSL1	-0.0750545	0.940262	0.998469	-0.00825882	0.110038	-0.223933	0.207415
chr17:39922412	chr17:39922412	NEUROD2	-0.583052	0.560654	0.998469	-0.136251	0.233685	-0.594274	0.321772
chr17:39922412	chr17:39922412	NR1D1	-0.596444	0.551696	0.998469	-0.111595	0.187101	-0.478313	0.255123
chr17:39922412	chr17:39922412	ORMDL3	-2.46518	0.0147182	0.351521	-0.136843	0.0555104	-0.245644	-0.0280429
chr17:39922412	chr17:39922412	PGAP3	-0.0931034	0.925934	0.998469	-0.0068411	0.0734786	-0.150859	0.137177
chr17:39922412	chr17:39922412	PPP1R1B	0.165771	0.86854	0.998469	0.0575452	0.347136	-0.622841	0.737932
chr17:39922412	chr17:39922412	PSMD3	0.0864986	0.931175	0.998469	0.00420455	0.0486083	-0.0910678	0.0994769
chr17:39922412	chr17:39922412	RAPGEFL1	-1.94579	0.0533793	0.717102	-0.227077	0.116702	-0.455812	0.00165848
chr17:39922412	chr17:39922412	RARA	-0.442815	0.65848	0.998469	-0.0645943	0.145872	-0.350504	0.221315
chr17:39922412	chr17:39922412	STARD3	-2.68698	0.00794841	0.265813	-0.166612	0.0620072	-0.288146	-0.045078
chr17:39922412	chr17:39922412	TCAP	-0.321403	0.748312	0.998469	-0.0651418	0.202679	-0.462394	0.33211
chr17:39922412	chr17:39922412	THRA	0.311861	0.75554	0.998469	0.0347315	0.111369	-0.183551	0.253014
chr17:39922412	chr17:39922412	TOP2A	-2.94017	0.00375144	0.151664	-0.620608	0.211079	-1.03432	-0.206893
chr17:39922412	chr17:39922412	WIPF2	-0.970451	0.333242	0.998469	-0.0631891	0.0651131	-0.190811	0.0644326
chr17:39923370	chr17:39923370	CASC3	-1.55974	0.120738	0.898459	-0.129438	0.082987	-0.292093	0.0332165
chr17:39923370	chr17:39923370	CDC6	1.05658	0.292247	0.998469	0.412967	0.390852	-0.353102	1.17904
chr17:39923370	chr17:39923370	CDK12	1.10471	0.270895	0.990265	0.112625	0.10195	-0.0871975	0.312448
chr17:39923370	chr17:39923370	CSF3	1.01712	0.310585	0.998469	0.508692	0.500129	-0.471561	1.48895
chr17:39923370	chr17:39923370	ERBB2	0.495427	0.620958	0.998469	0.04256	0.0859057	-0.125815	0.210935
chr17:39923370	chr17:39923370	GJD3	0.504604	0.61451	0.998469	0.110389	0.218765	-0.318389	0.539168
chr17:39923370	chr17:39923370	GRB7	1.02475	0.306982	0.998469	0.153464	0.149758	-0.140062	0.44699
chr17:39923370	chr17:39923370	GSDMA	0.561152	0.575455	0.998469	0.236097	0.420737	-0.588547	1.06074
chr17:39923370	chr17:39923370	GSDMB	1.11436	0.266747	0.988391	0.148766	0.133499	-0.112893	0.410424
chr17:39923370	chr17:39923370	IKZF3	-0.0479745	0.961795	0.998469	-0.0133694	0.278678	-0.559578	0.532839
chr17:39923370	chr17:39923370	MED1	1.50181	0.135057	0.916586	0.172443	0.114823	-0.0526108	0.397497
chr17:39923370	chr17:39923370	MED24	-0.681667	0.496405	0.998469	-0.0427748	0.0627502	-0.165765	0.0802157
chr17:39923370	chr17:39923370	MIEN1	-0.039368	0.968645	0.998469	-0.00220875	0.0561053	-0.112175	0.107758
chr17:39923370	chr17:39923370	MSL1	1.47917	0.141003	0.916586	0.193475	0.1308	-0.0628931	0.449843
chr17:39923370	chr17:39923370	NEUROD2	1.56298	0.119973	0.898459	0.43427	0.277847	-0.110311	0.97885
chr17:39923370	chr17:39923370	NR1D1	0.16012	0.872982	0.998469	0.0358819	0.224093	-0.403341	0.475105
chr17:39923370	chr17:39923370	ORMDL3	-0.636448	0.525367	0.998469	-0.042991	0.0675484	-0.175386	0.0894039
chr17:39923370	chr17:39923370	PGAP3	0.358458	0.720459	0.998469	0.0315037	0.0878865	-0.140754	0.203761
chr17:39923370	chr17:39923370	PPP1R1B	-1.70008	0.0909999	0.810142	-0.70009	0.411798	-1.50721	0.107034
chr17:39923370	chr17:39923370	PSMD3	1.41611	0.158628	0.945122	0.081868	0.0578118	-0.0314432	0.195179
chr17:39923370	chr17:39923370	RAPGEFL1	0.936401	0.350436	0.998469	0.131896	0.140855	-0.144179	0.407972
chr17:39923370	chr17:39923370	RARA	0.958157	0.339386	0.998469	0.166871	0.174158	-0.174479	0.508222
chr17:39923370	chr17:39923370	STARD3	1.77981	0.0769478	0.760383	0.13363	0.0750813	-0.0135289	0.28079
chr17:39923370	chr17:39923370	TCAP	-0.65766	0.511673	0.998469	-0.15933	0.242268	-0.634176	0.315516
chr17:39923370	chr17:39923370	THRA	-0.58519	0.559219	0.998469	-0.0779214	0.133156	-0.338907	0.183064
chr17:39923370	chr17:39923370	TOP2A	-0.535323	0.593147	0.998469	-0.138577	0.258867	-0.645956	0.368801
chr17:39923370	chr17:39923370	WIPF2	0.160129	0.872976	0.998469	0.01251	0.078125	-0.140615	0.165635
chr17:39924612	chr17:39924612	CASC3	-0.714075	0.47619	0.998469	-0.026412	0.0369877	-0.098908	0.0460839
chr17:39924612	chr17:39924612	CDC6	-0.229564	0.818715	0.998469	-0.0398887	0.173759	-0.380456	0.300678
chr17:39924612	chr17:39924612	CDK12	0.654321	0.513816	0.998469	0.0296317	0.0452862	-0.0591292	0.118393
chr17:39924612	chr17:39924612	CSF3	0.31135	0.755927	0.998469	0.0691991	0.222255	-0.36642	0.504819
chr17:39924612	chr17:39924612	ERBB2	0.0344515	0.972559	0.998469	0.00131247	0.0380963	-0.0733562	0.0759812
chr17:39924612	chr17:39924612	GJD3	0.51111	0.609957	0.998469	0.0495475	0.096941	-0.140457	0.239552
chr17:39924612	chr17:39924612	GRB7	0.569089	0.57007	0.998469	0.0378496	0.0665092	-0.0925083	0.168208
chr17:39924612	chr17:39924612	GSDMA	-1.91308	0.0574691	0.717102	-0.353129	0.184586	-0.714919	0.00865998
chr17:39924612	chr17:39924612	GSDMB	1.88677	0.0609473	0.717102	0.110849	0.0587504	-0.00430208	0.225999
chr17:39924612	chr17:39924612	IKZF3	-0.255023	0.799023	0.998469	-0.0314876	0.123469	-0.273487	0.210512
chr17:39924612	chr17:39924612	MED1	-0.847353	0.398026	0.998469	-0.0433151	0.0511181	-0.143507	0.0568764
chr17:39924612	chr17:39924612	MED24	0.0149272	0.988108	0.998469	0.000415666	0.0278461	-0.0541628	0.0549941
chr17:39924612	chr17:39924612	MIEN1	0.385577	0.700307	0.998469	0.0095821	0.0248513	-0.0391265	0.0582907
chr17:39924612	chr17:39924612	MSL1	0.775905	0.438916	0.998469	0.0451882	0.0582394	-0.0689609	0.159337
chr17:39924612	chr17:39924612	NEUROD2	-0.503976	0.61495	0.998469	-0.0624616	0.123938	-0.305379	0.180456
chr17:39924612	chr17:39924612	NR1D1	-0.920379	0.358718	0.998469	-0.0911711	0.0990581	-0.285325	0.102983
chr17:39924612	chr17:39924612	ORMDL3	0.617718	0.537613	0.998469	0.0184916	0.0299354	-0.0401818	0.0771651
chr17:39924612	chr17:39924612	PGAP3	0.558873	0.577006	0.998469	0.0217537	0.0389242	-0.0545378	0.0980452
chr17:39924612	chr17:39924612	PPP1R1B	0.233201	0.815894	0.998469	0.0429194	0.184045	-0.317808	0.403647
chr17:39924612	chr17:39924612	PSMD3	-0.906916	0.365774	0.998469	-0.0233167	0.0257099	-0.073708	0.0270746
chr17:39924612	chr17:39924612	RAPGEFL1	-0.0158272	0.987391	0.998469	-0.000990524	0.0625837	-0.123655	0.121674
chr17:39924612	chr17:39924612	RARA	-0.138055	0.890366	0.998469	-0.0106835	0.0773862	-0.162361	0.140994
chr17:39924612	chr17:39924612	STARD3	-0.876022	0.382292	0.998469	-0.0293567	0.0335114	-0.0950391	0.0363257
chr17:39924612	chr17:39924612	TCAP	-0.597959	0.550687	0.998469	-0.0642104	0.107383	-0.27468	0.14626
chr17:39924612	chr17:39924612	THRA	-2.65716	0.00865446	0.279697	-0.153698	0.057843	-0.26707	-0.0403259
chr17:39924612	chr17:39924612	TOP2A	0.523202	0.601536	0.998469	0.0600208	0.114718	-0.164827	0.284868
chr17:39924612	chr17:39924612	WIPF2	-1.04633	0.29694	0.998469	-0.0361073	0.0345086	-0.103744	0.0315295
rs8076131	chr17:39924659	CASC3	0.432898	0.665654	0.998469	0.021934	0.0506678	-0.0773748	0.121243
rs8076131	chr17:39924659	CDC6	0.126935	0.899147	0.998469	0.0301873	0.237818	-0.435936	0.496311
rs8076131	chr17:39924659	CDK12	-0.0865015	0.931173	0.998469	-0.00536776	0.0620539	-0.126993	0.116258
rs8076131	chr17:39924659	CSF3	0.728265	0.467484	0.998469	0.221219	0.303761	-0.374153	0.816591
rs8076131	chr17:39924659	ERBB2	1.11996	0.26436	0.988391	0.058169	0.0519386	-0.0436307	0.159969
rs8076131	chr17:39924659	GJD3	0.815026	0.416232	0.998469	0.107994	0.132504	-0.151714	0.367702
rs8076131	chr17:39924659	GRB7	0.507606	0.612408	0.998469	0.046211	0.0910372	-0.132222	0.224644
rs8076131	chr17:39924659	GSDMA	1.45441	0.147733	0.922393	0.369091	0.253775	-0.128307	0.866489
rs8076131	chr17:39924659	GSDMB	4.61938	7.71487e-06	0.00137132	0.353241	0.0764693	0.203361	0.50312
rs8076131	chr17:39924659	IKZF3	0.646416	0.518908	0.998469	0.109108	0.16879	-0.221719	0.439936
rs8076131	chr17:39924659	MED1	0.373502	0.709254	0.998469	0.0261744	0.0700785	-0.111179	0.163528
rs8076131	chr17:39924659	MED24	0.1783	0.858706	0.998469	0.00679399	0.0381043	-0.0678904	0.0814784
rs8076131	chr17:39924659	MIEN1	1.14975	0.251911	0.987976	0.0389643	0.0338893	-0.0274588	0.105387
rs8076131	chr17:39924659	MSL1	1.20431	0.230195	0.987976	0.0957404	0.0794982	-0.0600761	0.251557
rs8076131	chr17:39924659	NEUROD2	0.66368	0.507822	0.998469	0.112504	0.169515	-0.219746	0.444753
rs8076131	chr17:39924659	NR1D1	1.19262	0.234729	0.987976	0.161396	0.135328	-0.103848	0.426639
rs8076131	chr17:39924659	ORMDL3	0.172168	0.863516	0.998469	0.00706075	0.0410108	-0.0733204	0.0874419
rs8076131	chr17:39924659	PGAP3	2.93869	0.0037685	0.151664	0.152741	0.0519761	0.0508684	0.254615
rs8076131	chr17:39924659	PPP1R1B	-0.232192	0.816677	0.998469	-0.0584817	0.251869	-0.552144	0.435181
rs8076131	chr17:39924659	PSMD3	0.387061	0.69921	0.998469	0.0136462	0.035256	-0.0554555	0.0827479
rs8076131	chr17:39924659	RAPGEFL1	0.523188	0.601545	0.998469	0.0447724	0.085576	-0.122957	0.212501
rs8076131	chr17:39924659	RARA	1.79435	0.0745883	0.760383	0.188213	0.104892	-0.0173755	0.393802
rs8076131	chr17:39924659	STARD3	0.339669	0.734538	0.998469	0.0156083	0.0459514	-0.0744565	0.105673
rs8076131	chr17:39924659	TCAP	0.880062	0.380106	0.998469	0.129167	0.14677	-0.158503	0.416836
rs8076131	chr17:39924659	THRA	-1.77949	0.0770009	0.760383	-0.142484	0.0800704	-0.299422	0.0144538
rs8076131	chr17:39924659	TOP2A	0.222928	0.823867	0.998469	0.0350221	0.1571	-0.272895	0.342939
rs8076131	chr17:39924659	WIPF2	-0.204638	0.838107	0.998469	-0.00969493	0.047376	-0.102552	0.083162
rs28623237	chr17:39924694	CASC3	0.598797	0.55013	0.998469	0.026435	0.0441468	-0.0600928	0.112963
rs28623237	chr17:39924694	CDC6	1.1235	0.262857	0.988391	0.232048	0.20654	-0.17277	0.636866
rs28623237	chr17:39924694	CDK12	-1.07214	0.285223	0.991261	-0.0577983	0.0539093	-0.163461	0.0478639
rs28623237	chr17:39924694	CSF3	0.0229653	0.981706	0.998469	0.00609105	0.265229	-0.513758	0.52594
rs28623237	chr17:39924694	ERBB2	0.900202	0.369325	0.998469	0.0408134	0.0453381	-0.0480492	0.129676
rs28623237	chr17:39924694	GJD3	-0.494227	0.621804	0.998469	-0.0571609	0.115657	-0.283849	0.169527
rs28623237	chr17:39924694	GRB7	0.144965	0.884915	0.998469	0.0115129	0.0794186	-0.144148	0.167173
rs28623237	chr17:39924694	GSDMA	3.44512	0.000723885	0.0561822	0.740844	0.215042	0.319362	1.16233
rs28623237	chr17:39924694	GSDMB	0.514352	0.607694	0.998469	0.0364084	0.0707849	-0.10233	0.175147
rs28623237	chr17:39924694	IKZF3	0.261403	0.794108	0.998469	0.0385042	0.147298	-0.2502	0.327209
rs28623237	chr17:39924694	MED1	1.42817	0.155132	0.942192	0.0867508	0.0607425	-0.0323045	0.205806
rs28623237	chr17:39924694	MED24	-0.562968	0.574221	0.998469	-0.0186842	0.0331888	-0.0837342	0.0463658
rs28623237	chr17:39924694	MIEN1	0.531984	0.595452	0.998469	0.0157658	0.0296358	-0.0423203	0.0738519
rs28623237	chr17:39924694	MSL1	0.317638	0.751161	0.998469	0.0221029	0.0695853	-0.114284	0.15849
rs28623237	chr17:39924694	NEUROD2	0.447339	0.655217	0.998469	0.0661535	0.147882	-0.223696	0.356003
rs28623237	chr17:39924694	NR1D1	1.51476	0.131746	0.916586	0.178234	0.117665	-0.0523888	0.408857
rs28623237	chr17:39924694	ORMDL3	-0.456661	0.648516	0.998469	-0.0163173	0.0357318	-0.0863518	0.0537171
rs28623237	chr17:39924694	PGAP3	1.2605	0.209268	0.987976	0.0583091	0.0462586	-0.0323578	0.148976
rs28623237	chr17:39924694	PPP1R1B	-1.02199	0.30828	0.998469	-0.223725	0.218911	-0.65279	0.20534
rs28623237	chr17:39924694	PSMD3	0.844968	0.399352	0.998469	0.0259254	0.0306821	-0.0342115	0.0860622
rs28623237	chr17:39924694	RAPGEFL1	0.0543749	0.956702	0.998469	0.00405975	0.0746621	-0.142278	0.150398
rs28623237	chr17:39924694	RARA	1.61629	0.107943	0.868435	0.14806	0.0916053	-0.0314861	0.327607
rs28623237	chr17:39924694	STARD3	1.67675	0.0954851	0.828158	0.0666258	0.0397351	-0.011255	0.144507
rs28623237	chr17:39924694	TCAP	0.330883	0.741152	0.998469	0.0424207	0.128204	-0.20886	0.293701
rs28623237	chr17:39924694	THRA	1.48833	0.138573	0.916586	0.104183	0.0699997	-0.0330169	0.241382
rs28623237	chr17:39924694	TOP2A	-0.626016	0.53217	0.998469	-0.0856456	0.136811	-0.353794	0.182503
rs28623237	chr17:39924694	WIPF2	0.360176	0.719176	0.998469	0.0148713	0.0412891	-0.0660552	0.0957979
chr17:39924911	chr17:39924911	CASC3	0.180805	0.856742	0.998469	0.0122671	0.0678471	-0.120713	0.145247
chr17:39924911	chr17:39924911	CDC6	1.3718	0.171989	0.947939	0.4342	0.316519	-0.186177	1.05458
chr17:39924911	chr17:39924911	CDK12	-1.17793	0.240521	0.987976	-0.0974262	0.0827097	-0.259537	0.0646849
chr17:39924911	chr17:39924911	CSF3	-1.01967	0.309376	0.998469	-0.413926	0.405939	-1.20957	0.381715
chr17:39924911	chr17:39924911	ERBB2	-0.857141	0.39261	0.998469	-0.0596785	0.0696251	-0.196144	0.0767867
chr17:39924911	chr17:39924911	GJD3	0.254609	0.799342	0.998469	0.0452362	0.177669	-0.302996	0.393468
chr17:39924911	chr17:39924911	GRB7	0.124629	0.900969	0.998469	0.0151968	0.121936	-0.223798	0.254192
chr17:39924911	chr17:39924911	GSDMA	0.522134	0.602277	0.998469	0.178334	0.341548	-0.4911	0.847768
chr17:39924911	chr17:39924911	GSDMB	0.646932	0.518575	0.998469	0.070275	0.108628	-0.142636	0.283186
chr17:39924911	chr17:39924911	IKZF3	0.776513	0.438558	0.998469	0.175327	0.225787	-0.267216	0.617869
chr17:39924911	chr17:39924911	MED1	0.122751	0.902454	0.998469	0.0115178	0.0938306	-0.17239	0.195426
chr17:39924911	chr17:39924911	MED24	-1.72298	0.0867656	0.810142	-0.0871003	0.0505521	-0.186182	0.0119819
chr17:39924911	chr17:39924911	MIEN1	-0.113489	0.909781	0.998469	-0.00516807	0.0455381	-0.0944228	0.0840866
chr17:39924911	chr17:39924911	MSL1	-0.816531	0.415374	0.998469	-0.0870865	0.106654	-0.296129	0.121956
chr17:39924911	chr17:39924911	NEUROD2	0.433539	0.66519	0.998469	0.0984383	0.227058	-0.346595	0.543471
chr17:39924911	chr17:39924911	NR1D1	-0.45226	0.651675	0.998469	-0.0822182	0.181794	-0.438534	0.274098
chr17:39924911	chr17:39924911	ORMDL3	0.0950422	0.924397	0.998469	0.00521721	0.0548936	-0.102374	0.112809
chr17:39924911	chr17:39924911	PGAP3	0.316555	0.751982	0.998469	0.0225836	0.071342	-0.117247	0.162414
chr17:39924911	chr17:39924911	PPP1R1B	0.770732	0.441968	0.998469	0.259396	0.336558	-0.400258	0.919051
chr17:39924911	chr17:39924911	PSMD3	1.09023	0.277201	0.991261	0.0512844	0.04704	-0.0409139	0.143483
chr17:39924911	chr17:39924911	RAPGEFL1	1.78785	0.0756352	0.760383	0.202989	0.113538	-0.0195454	0.425524
chr17:39924911	chr17:39924911	RARA	0.931381	0.353017	0.998469	0.131681	0.141383	-0.145429	0.408792
chr17:39924911	chr17:39924911	STARD3	-0.259887	0.795275	0.998469	-0.0159861	0.0615117	-0.136549	0.104577
chr17:39924911	chr17:39924911	TCAP	-0.633601	0.527219	0.998469	-0.124606	0.196663	-0.510066	0.260854
chr17:39924911	chr17:39924911	THRA	0.731383	0.465583	0.998469	0.0790019	0.108017	-0.132712	0.290716
chr17:39924911	chr17:39924911	TOP2A	2.68579	0.00797563	0.265813	0.552864	0.205848	0.149402	0.956327
chr17:39924911	chr17:39924911	WIPF2	-0.240461	0.810271	0.998469	-0.0152468	0.0634064	-0.139523	0.10903
rs73985229	chr17:39925400	CASC3	1.42235	0.156811	0.942192	0.0745756	0.0524311	-0.0281893	0.17734
rs73985229	chr17:39925400	CDC6	1.08637	0.278899	0.991261	0.267888	0.24659	-0.215428	0.751205
rs73985229	chr17:39925400	CDK12	-1.32929	0.185588	0.972286	-0.0853772	0.0642278	-0.211264	0.0405092
rs73985229	chr17:39925400	CSF3	0.00308875	0.997539	0.998469	0.000977841	0.316582	-0.619523	0.621478
rs73985229	chr17:39925400	ERBB2	0.358168	0.720676	0.998469	0.0194227	0.0542279	-0.086864	0.125709
rs73985229	chr17:39925400	GJD3	-1.14545	0.253683	0.987976	-0.157621	0.137606	-0.427329	0.112088
rs73985229	chr17:39925400	GRB7	-0.75336	0.452307	0.998469	-0.071297	0.0946387	-0.256789	0.114195
rs73985229	chr17:39925400	GSDMA	3.34604	0.00101506	0.0569768	0.860491	0.257167	0.356444	1.36454
rs73985229	chr17:39925400	GSDMB	0.245306	0.806524	0.998469	0.0207388	0.0845423	-0.144964	0.186442
rs73985229	chr17:39925400	IKZF3	0.953943	0.341508	0.998469	0.167294	0.175371	-0.176433	0.511021
rs73985229	chr17:39925400	MED1	0.858452	0.391888	0.998469	0.0624847	0.0727876	-0.080179	0.205148
rs73985229	chr17:39925400	MED24	-0.478127	0.633193	0.998469	-0.0189459	0.0396252	-0.0966114	0.0587196
rs73985229	chr17:39925400	MIEN1	0.0466857	0.96282	0.998469	0.00165285	0.0354038	-0.0677386	0.0710443
rs73985229	chr17:39925400	MSL1	-0.826655	0.409627	0.998469	-0.0685396	0.082912	-0.231047	0.0939679
rs73985229	chr17:39925400	NEUROD2	-0.725449	0.469204	0.998469	-0.127926	0.176341	-0.473554	0.217702
rs73985229	chr17:39925400	NR1D1	1.07929	0.282035	0.991261	0.152096	0.140923	-0.124113	0.428305
rs73985229	chr17:39925400	ORMDL3	-0.114165	0.909246	0.998469	-0.00487201	0.0426754	-0.0885157	0.0787717
rs73985229	chr17:39925400	PGAP3	1.1129	0.267371	0.988391	0.0615134	0.0552731	-0.0468219	0.169849
rs73985229	chr17:39925400	PPP1R1B	-0.384316	0.701239	0.998469	-0.100692	0.262004	-0.61422	0.412835
rs73985229	chr17:39925400	PSMD3	-0.387888	0.698599	0.998469	-0.0142297	0.036685	-0.0861323	0.057673
rs73985229	chr17:39925400	RAPGEFL1	-0.204871	0.837925	0.998469	-0.0182555	0.0891074	-0.192906	0.156395
rs73985229	chr17:39925400	RARA	0.741916	0.459193	0.998469	0.0816258	0.11002	-0.134014	0.297266
rs73985229	chr17:39925400	STARD3	0.377051	0.706621	0.998469	0.0180269	0.0478102	-0.0756812	0.111735
rs73985229	chr17:39925400	TCAP	0.614281	0.539876	0.998469	0.0939254	0.152903	-0.205764	0.393615
rs73985229	chr17:39925400	THRA	1.37567	0.17079	0.94622	0.115052	0.0836335	-0.0488699	0.278973
rs73985229	chr17:39925400	TOP2A	0.325045	0.745559	0.998469	0.0531257	0.163441	-0.267218	0.37347
rs73985229	chr17:39925400	WIPF2	0.0606346	0.951724	0.998469	0.00298941	0.0493021	-0.0936427	0.0996215
chr17:39925656	chr17:39925656	CASC3	-0.620175	0.535998	0.998469	-0.0451864	0.0728607	-0.187993	0.0976206
chr17:39925656	chr17:39925656	CDC6	0.394029	0.694068	0.998469	0.134776	0.342045	-0.535632	0.805183
chr17:39925656	chr17:39925656	CDK12	-0.0157874	0.987423	0.998469	-0.00140965	0.0892893	-0.176417	0.173597
chr17:39925656	chr17:39925656	CSF3	0.0116028	0.990757	0.998469	0.00507939	0.437774	-0.852957	0.863116
chr17:39925656	chr17:39925656	ERBB2	1.2314	0.219927	0.987976	0.0919532	0.0746739	-0.0544076	0.238314
chr17:39925656	chr17:39925656	GJD3	0.167585	0.867115	0.998469	0.0320125	0.191023	-0.342392	0.406417
chr17:39925656	chr17:39925656	GRB7	1.12835	0.260809	0.987976	0.147351	0.13059	-0.108605	0.403308
chr17:39925656	chr17:39925656	GSDMA	0.980852	0.328102	0.998469	0.359398	0.366414	-0.358774	1.07757
chr17:39925656	chr17:39925656	GSDMB	0.331746	0.740502	0.998469	0.0387773	0.116889	-0.190324	0.267879
chr17:39925656	chr17:39925656	IKZF3	-0.998852	0.319329	0.998469	-0.242163	0.242441	-0.717348	0.233022
chr17:39925656	chr17:39925656	MED1	1.06998	0.286192	0.991261	0.107563	0.100528	-0.0894721	0.304598
chr17:39925656	chr17:39925656	MED24	0.079807	0.936487	0.998469	0.00437592	0.0548312	-0.103093	0.111845
chr17:39925656	chr17:39925656	MIEN1	0.775081	0.439401	0.998469	0.0378769	0.0488683	-0.057905	0.133659
chr17:39925656	chr17:39925656	MSL1	1.31352	0.190832	0.972286	0.150126	0.114293	-0.0738883	0.37414
chr17:39925656	chr17:39925656	NEUROD2	1.54611	0.123994	0.898459	0.374908	0.242485	-0.100363	0.850178
chr17:39925656	chr17:39925656	NR1D1	1.02866	0.305146	0.998469	0.200519	0.194933	-0.181549	0.582588
chr17:39925656	chr17:39925656	ORMDL3	-0.376341	0.707147	0.998469	-0.0222	0.0589891	-0.137819	0.0934186
chr17:39925656	chr17:39925656	PGAP3	0.570877	0.56886	0.998469	0.0437538	0.0766432	-0.106467	0.193974
chr17:39925656	chr17:39925656	PPP1R1B	-0.821957	0.412288	0.998469	-0.297322	0.361725	-1.0063	0.411659
chr17:39925656	chr17:39925656	PSMD3	2.24031	0.026406	0.443497	0.112009	0.049997	0.0140145	0.210003
chr17:39925656	chr17:39925656	RAPGEFL1	0.152627	0.878879	0.998469	0.0188076	0.123226	-0.222715	0.26033
chr17:39925656	chr17:39925656	RARA	1.20931	0.228275	0.987976	0.183476	0.15172	-0.113896	0.480848
chr17:39925656	chr17:39925656	STARD3	2.10462	0.0368398	0.553376	0.13737	0.0652708	0.00943919	0.265301
chr17:39925656	chr17:39925656	TCAP	-0.596354	0.551756	0.998469	-0.126099	0.21145	-0.540541	0.288343
chr17:39925656	chr17:39925656	THRA	0.60612	0.545268	0.998469	0.0704201	0.116182	-0.157296	0.298136
chr17:39925656	chr17:39925656	TOP2A	-1.57329	0.117568	0.895617	-0.353051	0.224404	-0.792883	0.08678
chr17:39925656	chr17:39925656	WIPF2	0.3007	0.764022	0.998469	0.0204951	0.0681577	-0.113094	0.154084
chr17:39926234	chr17:39926234	CASC3	1.88265	0.0615076	0.717102	0.134436	0.0714075	-0.00552313	0.274394
chr17:39926234	chr17:39926234	CDC6	-0.00921561	0.992658	0.998469	-0.00312012	0.338569	-0.666715	0.660475
chr17:39926234	chr17:39926234	CDK12	-0.124415	0.901138	0.998469	-0.0109904	0.0883364	-0.18413	0.162149
chr17:39926234	chr17:39926234	CSF3	-0.265223	0.791168	0.998469	-0.11485	0.43303	-0.963588	0.733889
chr17:39926234	chr17:39926234	ERBB2	2.36148	0.019369	0.382537	0.172378	0.0729958	0.0293067	0.31545
chr17:39926234	chr17:39926234	GJD3	-0.491178	0.623953	0.998469	-0.0927694	0.188871	-0.462957	0.277418
chr17:39926234	chr17:39926234	GRB7	1.32555	0.186823	0.972286	0.171015	0.129014	-0.0818538	0.423883
chr17:39926234	chr17:39926234	GSDMA	0.55566	0.579196	0.998469	0.201836	0.363236	-0.510107	0.913779
chr17:39926234	chr17:39926234	GSDMB	1.47856	0.141163	0.916586	0.169926	0.114926	-0.0553296	0.395181
chr17:39926234	chr17:39926234	IKZF3	0.798987	0.425446	0.998469	0.191857	0.240125	-0.278788	0.662502
chr17:39926234	chr17:39926234	MED1	1.58427	0.115048	0.895608	0.156928	0.0990537	-0.0372177	0.351073
chr17:39926234	chr17:39926234	MED24	0.151341	0.879892	0.998469	0.0082096	0.0542458	-0.0981123	0.114531
chr17:39926234	chr17:39926234	MIEN1	-1.90232	0.0588719	0.717102	-0.0911483	0.0479144	-0.18506	0.00276386
chr17:39926234	chr17:39926234	MSL1	0.517923	0.605206	0.998469	0.0588236	0.113576	-0.163785	0.281432
chr17:39926234	chr17:39926234	NEUROD2	0.0328556	0.973829	0.998469	0.0079392	0.241639	-0.465673	0.481552
chr17:39926234	chr17:39926234	NR1D1	-0.123615	0.901771	0.998469	-0.0239158	0.19347	-0.403117	0.355285
chr17:39926234	chr17:39926234	ORMDL3	1.07932	0.28202	0.991261	0.0627973	0.0581823	-0.0512399	0.176835
chr17:39926234	chr17:39926234	PGAP3	1.92009	0.0565715	0.717102	0.14414	0.0750695	-0.00299601	0.291276
chr17:39926234	chr17:39926234	PPP1R1B	0.925789	0.355908	0.998469	0.331141	0.357685	-0.369922	1.0322
chr17:39926234	chr17:39926234	PSMD3	-0.0362418	0.971133	0.998469	-0.00181978	0.0502122	-0.100236	0.0965961
chr17:39926234	chr17:39926234	RAPGEFL1	0.00925641	0.992626	0.998469	0.00112859	0.121925	-0.237844	0.240102
chr17:39926234	chr17:39926234	RARA	0.546365	0.585553	0.998469	0.082302	0.150636	-0.212944	0.377548
chr17:39926234	chr17:39926234	STARD3	1.29056	0.198663	0.974132	0.0840288	0.0651105	-0.0435877	0.211645
chr17:39926234	chr17:39926234	TCAP	1.71053	0.0890469	0.810142	0.3551	0.207596	-0.0517885	0.761988
chr17:39926234	chr17:39926234	THRA	0.393316	0.694594	0.998469	0.0452396	0.115021	-0.180202	0.270681
chr17:39926234	chr17:39926234	TOP2A	0.39756	0.691468	0.998469	0.088883	0.223571	-0.349316	0.527082
chr17:39926234	chr17:39926234	WIPF2	-0.341507	0.733157	0.998469	-0.0230272	0.0674281	-0.155186	0.109132
chr17:39926554	chr17:39926554	CASC3	-1.65676	0.0994675	0.842124	-0.0621977	0.0375417	-0.135779	0.011384
chr17:39926554	chr17:39926554	CDC6	-0.230977	0.817619	0.998469	-0.0410094	0.177547	-0.389002	0.306983
chr17:39926554	chr17:39926554	CDK12	1.11682	0.265693	0.988391	0.0515521	0.0461596	-0.0389206	0.142025
chr17:39926554	chr17:39926554	CSF3	0.762314	0.446961	0.998469	0.172869	0.226769	-0.271598	0.617337
chr17:39926554	chr17:39926554	ERBB2	-1.06232	0.289645	0.995101	-0.0412122	0.0387947	-0.11725	0.0348254
chr17:39926554	chr17:39926554	GJD3	0.0529537	0.957833	0.998469	0.00524943	0.0991325	-0.18905	0.199549
chr17:39926554	chr17:39926554	GRB7	-0.27326	0.784995	0.998469	-0.0185846	0.0680107	-0.151886	0.114716
chr17:39926554	chr17:39926554	GSDMA	-2.58269	0.0106711	0.322749	-0.482836	0.186951	-0.849259	-0.116413
chr17:39926554	chr17:39926554	GSDMB	0.703566	0.482695	0.998469	0.0426254	0.0605848	-0.0761208	0.161372
chr17:39926554	chr17:39926554	IKZF3	-1.33277	0.184444	0.972286	-0.16728	0.125513	-0.413285	0.0787253
chr17:39926554	chr17:39926554	MED1	-1.83162	0.0688115	0.732207	-0.0949184	0.0518221	-0.19649	0.00665299
chr17:39926554	chr17:39926554	MED24	0.242696	0.808543	0.998469	0.00690428	0.0284483	-0.0488544	0.0626629
chr17:39926554	chr17:39926554	MIEN1	0.793172	0.428817	0.998469	0.020112	0.0253564	-0.0295866	0.0698105
chr17:39926554	chr17:39926554	MSL1	0.316097	0.752328	0.998469	0.0188393	0.0595998	-0.0979762	0.135655
chr17:39926554	chr17:39926554	NEUROD2	-0.502579	0.615931	0.998469	-0.0636469	0.126641	-0.311863	0.184569
chr17:39926554	chr17:39926554	NR1D1	-0.590324	0.555781	0.998469	-0.0598415	0.101371	-0.258528	0.138845
chr17:39926554	chr17:39926554	ORMDL3	-0.331084	0.741001	0.998469	-0.0101356	0.0306134	-0.0701378	0.0498666
chr17:39926554	chr17:39926554	PGAP3	-0.331387	0.740772	0.998469	-0.0131884	0.0397974	-0.0911913	0.0648146
chr17:39926554	chr17:39926554	PPP1R1B	-0.452632	0.651408	0.998469	-0.0850822	0.187972	-0.453508	0.283343
chr17:39926554	chr17:39926554	PSMD3	-1.27095	0.205536	0.987976	-0.0333089	0.0262079	-0.0846764	0.0180586
chr17:39926554	chr17:39926554	RAPGEFL1	-1.41712	0.158332	0.945122	-0.0900763	0.0635628	-0.214659	0.0345068
chr17:39926554	chr17:39926554	RARA	-1.09431	0.275414	0.991261	-0.0862238	0.0787929	-0.240658	0.0682103
chr17:39926554	chr17:39926554	STARD3	-0.75465	0.451535	0.998469	-0.0258563	0.0342626	-0.0930111	0.0412985
chr17:39926554	chr17:39926554	TCAP	-1.48524	0.139387	0.916586	-0.162064	0.109116	-0.375932	0.0518035
chr17:39926554	chr17:39926554	THRA	-2.82066	0.00538065	0.190077	-0.166281	0.0589511	-0.281825	-0.0507369
chr17:39926554	chr17:39926554	TOP2A	-1.15756	0.248715	0.987976	-0.135254	0.116843	-0.364267	0.0937595
chr17:39926554	chr17:39926554	WIPF2	-0.927443	0.355051	0.998469	-0.0327257	0.035286	-0.101886	0.0364348
rs17608925	chr17:39926578	CASC3	0.153595	0.878117	0.998469	0.0129633	0.0843991	-0.152459	0.178385
rs17608925	chr17:39926578	CDC6	-0.341141	0.733431	0.998469	-0.135032	0.395825	-0.91085	0.640785
rs17608925	chr17:39926578	CDK12	0.00476273	0.996206	0.998469	0.000492068	0.103316	-0.202008	0.202992
rs17608925	chr17:39926578	CSF3	-1.19156	0.235144	0.987976	-0.601001	0.504381	-1.58959	0.387586
rs17608925	chr17:39926578	ERBB2	-0.870138	0.385489	0.998469	-0.0753562	0.0866026	-0.245097	0.0943848
rs17608925	chr17:39926578	GJD3	-0.731343	0.465607	0.998469	-0.161403	0.220693	-0.593962	0.271156
rs17608925	chr17:39926578	GRB7	0.348523	0.727892	0.998469	0.0528469	0.151631	-0.24435	0.350044
rs17608925	chr17:39926578	GSDMA	-1.25473	0.211353	0.987976	-0.530996	0.423197	-1.36046	0.29847
rs17608925	chr17:39926578	GSDMB	-6.01113	1.14573e-08	3.4912e-06	-0.736619	0.122542	-0.976802	-0.496436
rs17608925	chr17:39926578	IKZF3	-1.22896	0.220838	0.987976	-0.344226	0.280096	-0.893214	0.204762
rs17608925	chr17:39926578	MED1	-0.658354	0.511228	0.998469	-0.0767447	0.116571	-0.305223	0.151734
rs17608925	chr17:39926578	MED24	1.88091	0.0617461	0.717102	0.118078	0.0627768	-0.00496508	0.24112
rs17608925	chr17:39926578	MIEN1	0.0475039	0.962169	0.998469	0.00269099	0.0566478	-0.108339	0.113721
rs17608925	chr17:39926578	MSL1	-0.159951	0.873115	0.998469	-0.0212619	0.132927	-0.2818	0.239276
rs17608925	chr17:39926578	NEUROD2	-0.87904	0.380658	0.998469	-0.24784	0.281944	-0.800451	0.30477
rs17608925	chr17:39926578	NR1D1	0.0694077	0.944749	0.998469	0.0157052	0.226275	-0.427794	0.459204
rs17608925	chr17:39926578	ORMDL3	1.04726	0.296513	0.998469	0.0712759	0.0680596	-0.0621209	0.204673
rs17608925	chr17:39926578	PGAP3	-2.66436	0.00847904	0.278243	-0.231589	0.086921	-0.401954	-0.0612236
rs17608925	chr17:39926578	PPP1R1B	-0.265545	0.790921	0.998469	-0.111348	0.419317	-0.933209	0.710514
rs17608925	chr17:39926578	PSMD3	0.157204	0.875276	0.998469	0.00923107	0.0587202	-0.105861	0.124323
rs17608925	chr17:39926578	RAPGEFL1	-0.163114	0.870629	0.998469	-0.0232572	0.142583	-0.30272	0.256205
rs17608925	chr17:39926578	RARA	-0.19294	0.847243	0.998469	-0.0340176	0.176312	-0.379588	0.311553
rs17608925	chr17:39926578	STARD3	0.174773	0.861472	0.998469	0.0133745	0.0765246	-0.136614	0.163363
rs17608925	chr17:39926578	TCAP	-0.630453	0.529271	0.998469	-0.154232	0.244637	-0.633721	0.325257
rs17608925	chr17:39926578	THRA	1.00969	0.314122	0.998469	0.135469	0.134169	-0.127502	0.398441
rs17608925	chr17:39926578	TOP2A	-1.28739	0.19976	0.977268	-0.335099	0.260293	-0.845274	0.175075
rs17608925	chr17:39926578	WIPF2	-0.884414	0.37776	0.998469	-0.0696037	0.0787004	-0.223856	0.0846491
rs113282230	chr17:39927157	CASC3	1.42235	0.156811	0.942192	0.0745756	0.0524311	-0.0281893	0.17734
rs113282230	chr17:39927157	CDC6	1.08637	0.278899	0.991261	0.267888	0.24659	-0.215428	0.751205
rs113282230	chr17:39927157	CDK12	-1.32929	0.185588	0.972286	-0.0853772	0.0642278	-0.211264	0.0405092
rs113282230	chr17:39927157	CSF3	0.00308875	0.997539	0.998469	0.000977841	0.316582	-0.619523	0.621478
rs113282230	chr17:39927157	ERBB2	0.358168	0.720676	0.998469	0.0194227	0.0542279	-0.086864	0.125709
rs113282230	chr17:39927157	GJD3	-1.14545	0.253683	0.987976	-0.157621	0.137606	-0.427329	0.112088
rs113282230	chr17:39927157	GRB7	-0.75336	0.452307	0.998469	-0.071297	0.0946387	-0.256789	0.114195
rs113282230	chr17:39927157	GSDMA	3.34604	0.00101506	0.0569768	0.860491	0.257167	0.356444	1.36454
rs113282230	chr17:39927157	GSDMB	0.245306	0.806524	0.998469	0.0207388	0.0845423	-0.144964	0.186442
rs113282230	chr17:39927157	IKZF3	0.953943	0.341508	0.998469	0.167294	0.175371	-0.176433	0.511021
rs113282230	chr17:39927157	MED1	0.858452	0.391888	0.998469	0.0624847	0.0727876	-0.080179	0.205148
rs113282230	chr17:39927157	MED24	-0.478127	0.633193	0.998469	-0.0189459	0.0396252	-0.0966114	0.0587196
rs113282230	chr17:39927157	MIEN1	0.0466857	0.96282	0.998469	0.00165285	0.0354038	-0.0677386	0.0710443
rs113282230	chr17:39927157	MSL1	-0.826655	0.409627	0.998469	-0.0685396	0.082912	-0.231047	0.0939679
rs113282230	chr17:39927157	NEUROD2	-0.725449	0.469204	0.998469	-0.127926	0.176341	-0.473554	0.217702
rs113282230	chr17:39927157	NR1D1	1.07929	0.282035	0.991261	0.152096	0.140923	-0.124113	0.428305
rs113282230	chr17:39927157	ORMDL3	-0.114165	0.909246	0.998469	-0.00487201	0.0426754	-0.0885157	0.0787717
rs113282230	chr17:39927157	PGAP3	1.1129	0.267371	0.988391	0.0615134	0.0552731	-0.0468219	0.169849
rs113282230	chr17:39927157	PPP1R1B	-0.384316	0.701239	0.998469	-0.100692	0.262004	-0.61422	0.412835
rs113282230	chr17:39927157	PSMD3	-0.387888	0.698599	0.998469	-0.0142297	0.036685	-0.0861323	0.057673
rs113282230	chr17:39927157	RAPGEFL1	-0.204871	0.837925	0.998469	-0.0182555	0.0891074	-0.192906	0.156395
rs113282230	chr17:39927157	RARA	0.741916	0.459193	0.998469	0.0816258	0.11002	-0.134014	0.297266
rs113282230	chr17:39927157	STARD3	0.377051	0.706621	0.998469	0.0180269	0.0478102	-0.0756812	0.111735
rs113282230	chr17:39927157	TCAP	0.614281	0.539876	0.998469	0.0939254	0.152903	-0.205764	0.393615
rs113282230	chr17:39927157	THRA	1.37567	0.17079	0.94622	0.115052	0.0836335	-0.0488699	0.278973
rs113282230	chr17:39927157	TOP2A	0.325045	0.745559	0.998469	0.0531257	0.163441	-0.267218	0.37347
rs113282230	chr17:39927157	WIPF2	0.0606346	0.951724	0.998469	0.00298941	0.0493021	-0.0936427	0.0996215
rs113571956	chr17:39927234	CASC3	1.42235	0.156811	0.942192	0.0745756	0.0524311	-0.0281893	0.17734
rs113571956	chr17:39927234	CDC6	1.08637	0.278899	0.991261	0.267888	0.24659	-0.215428	0.751205
rs113571956	chr17:39927234	CDK12	-1.32929	0.185588	0.972286	-0.0853772	0.0642278	-0.211264	0.0405092
rs113571956	chr17:39927234	CSF3	0.00308875	0.997539	0.998469	0.000977841	0.316582	-0.619523	0.621478
rs113571956	chr17:39927234	ERBB2	0.358168	0.720676	0.998469	0.0194227	0.0542279	-0.086864	0.125709
rs113571956	chr17:39927234	GJD3	-1.14545	0.253683	0.987976	-0.157621	0.137606	-0.427329	0.112088
rs113571956	chr17:39927234	GRB7	-0.75336	0.452307	0.998469	-0.071297	0.0946387	-0.256789	0.114195
rs113571956	chr17:39927234	GSDMA	3.34604	0.00101506	0.0569768	0.860491	0.257167	0.356444	1.36454
rs113571956	chr17:39927234	GSDMB	0.245306	0.806524	0.998469	0.0207388	0.0845423	-0.144964	0.186442
rs113571956	chr17:39927234	IKZF3	0.953943	0.341508	0.998469	0.167294	0.175371	-0.176433	0.511021
rs113571956	chr17:39927234	MED1	0.858452	0.391888	0.998469	0.0624847	0.0727876	-0.080179	0.205148
rs113571956	chr17:39927234	MED24	-0.478127	0.633193	0.998469	-0.0189459	0.0396252	-0.0966114	0.0587196
rs113571956	chr17:39927234	MIEN1	0.0466857	0.96282	0.998469	0.00165285	0.0354038	-0.0677386	0.0710443
rs113571956	chr17:39927234	MSL1	-0.826655	0.409627	0.998469	-0.0685396	0.082912	-0.231047	0.0939679
rs113571956	chr17:39927234	NEUROD2	-0.725449	0.469204	0.998469	-0.127926	0.176341	-0.473554	0.217702
rs113571956	chr17:39927234	NR1D1	1.07929	0.282035	0.991261	0.152096	0.140923	-0.124113	0.428305
rs113571956	chr17:39927234	ORMDL3	-0.114165	0.909246	0.998469	-0.00487201	0.0426754	-0.0885157	0.0787717
rs113571956	chr17:39927234	PGAP3	1.1129	0.267371	0.988391	0.0615134	0.0552731	-0.0468219	0.169849
rs113571956	chr17:39927234	PPP1R1B	-0.384316	0.701239	0.998469	-0.100692	0.262004	-0.61422	0.412835
rs113571956	chr17:39927234	PSMD3	-0.387888	0.698599	0.998469	-0.0142297	0.036685	-0.0861323	0.057673
rs113571956	chr17:39927234	RAPGEFL1	-0.204871	0.837925	0.998469	-0.0182555	0.0891074	-0.192906	0.156395
rs113571956	chr17:39927234	RARA	0.741916	0.459193	0.998469	0.0816258	0.11002	-0.134014	0.297266
rs113571956	chr17:39927234	STARD3	0.377051	0.706621	0.998469	0.0180269	0.0478102	-0.0756812	0.111735
rs113571956	chr17:39927234	TCAP	0.614281	0.539876	0.998469	0.0939254	0.152903	-0.205764	0.393615
rs113571956	chr17:39927234	THRA	1.37567	0.17079	0.94622	0.115052	0.0836335	-0.0488699	0.278973
rs113571956	chr17:39927234	TOP2A	0.325045	0.745559	0.998469	0.0531257	0.163441	-0.267218	0.37347
rs113571956	chr17:39927234	WIPF2	0.0606346	0.951724	0.998469	0.00298941	0.0493021	-0.0936427	0.0996215
chr17:39927878	chr17:39927878	CASC3	-0.620175	0.535998	0.998469	-0.0451864	0.0728607	-0.187993	0.0976206
chr17:39927878	chr17:39927878	CDC6	0.394029	0.694068	0.998469	0.134776	0.342045	-0.535632	0.805183
chr17:39927878	chr17:39927878	CDK12	-0.0157874	0.987423	0.998469	-0.00140965	0.0892893	-0.176417	0.173597
chr17:39927878	chr17:39927878	CSF3	0.0116028	0.990757	0.998469	0.00507939	0.437774	-0.852957	0.863116
chr17:39927878	chr17:39927878	ERBB2	1.2314	0.219927	0.987976	0.0919532	0.0746739	-0.0544076	0.238314
chr17:39927878	chr17:39927878	GJD3	0.167585	0.867115	0.998469	0.0320125	0.191023	-0.342392	0.406417
chr17:39927878	chr17:39927878	GRB7	1.12835	0.260809	0.987976	0.147351	0.13059	-0.108605	0.403308
chr17:39927878	chr17:39927878	GSDMA	0.980852	0.328102	0.998469	0.359398	0.366414	-0.358774	1.07757
chr17:39927878	chr17:39927878	GSDMB	0.331746	0.740502	0.998469	0.0387773	0.116889	-0.190324	0.267879
chr17:39927878	chr17:39927878	IKZF3	-0.998852	0.319329	0.998469	-0.242163	0.242441	-0.717348	0.233022
chr17:39927878	chr17:39927878	MED1	1.06998	0.286192	0.991261	0.107563	0.100528	-0.0894721	0.304598
chr17:39927878	chr17:39927878	MED24	0.079807	0.936487	0.998469	0.00437592	0.0548312	-0.103093	0.111845
chr17:39927878	chr17:39927878	MIEN1	0.775081	0.439401	0.998469	0.0378769	0.0488683	-0.057905	0.133659
chr17:39927878	chr17:39927878	MSL1	1.31352	0.190832	0.972286	0.150126	0.114293	-0.0738883	0.37414
chr17:39927878	chr17:39927878	NEUROD2	1.54611	0.123994	0.898459	0.374908	0.242485	-0.100363	0.850178
chr17:39927878	chr17:39927878	NR1D1	1.02866	0.305146	0.998469	0.200519	0.194933	-0.181549	0.582588
chr17:39927878	chr17:39927878	ORMDL3	-0.376341	0.707147	0.998469	-0.0222	0.0589891	-0.137819	0.0934186
chr17:39927878	chr17:39927878	PGAP3	0.570877	0.56886	0.998469	0.0437538	0.0766432	-0.106467	0.193974
chr17:39927878	chr17:39927878	PPP1R1B	-0.821957	0.412288	0.998469	-0.297322	0.361725	-1.0063	0.411659
chr17:39927878	chr17:39927878	PSMD3	2.24031	0.026406	0.443497	0.112009	0.049997	0.0140145	0.210003
chr17:39927878	chr17:39927878	RAPGEFL1	0.152627	0.878879	0.998469	0.0188076	0.123226	-0.222715	0.26033
chr17:39927878	chr17:39927878	RARA	1.20931	0.228275	0.987976	0.183476	0.15172	-0.113896	0.480848
chr17:39927878	chr17:39927878	STARD3	2.10462	0.0368398	0.553376	0.13737	0.0652708	0.00943919	0.265301
chr17:39927878	chr17:39927878	TCAP	-0.596354	0.551756	0.998469	-0.126099	0.21145	-0.540541	0.288343
chr17:39927878	chr17:39927878	THRA	0.60612	0.545268	0.998469	0.0704201	0.116182	-0.157296	0.298136
chr17:39927878	chr17:39927878	TOP2A	-1.57329	0.117568	0.895617	-0.353051	0.224404	-0.792883	0.08678
chr17:39927878	chr17:39927878	WIPF2	0.3007	0.764022	0.998469	0.0204951	0.0681577	-0.113094	0.154084
chr17:39928097	chr17:39928097	CASC3	0.426934	0.669984	0.998469	0.0176551	0.0413533	-0.0633973	0.0987075
chr17:39928097	chr17:39928097	CDC6	0.591446	0.555031	0.998469	0.114681	0.1939	-0.265363	0.494725
chr17:39928097	chr17:39928097	CDK12	0.14885	0.881854	0.998469	0.00753823	0.0506432	-0.0917225	0.106799
chr17:39928097	chr17:39928097	CSF3	1.39116	0.16605	0.94622	0.343435	0.24687	-0.14043	0.827301
chr17:39928097	chr17:39928097	ERBB2	-0.0498549	0.960298	0.998469	-0.00212134	0.0425503	-0.0855199	0.0812773
chr17:39928097	chr17:39928097	GJD3	-0.789424	0.430997	0.998469	-0.0853817	0.108157	-0.297369	0.126606
chr17:39928097	chr17:39928097	GRB7	-0.938847	0.349182	0.998469	-0.0696253	0.0741604	-0.21498	0.0757292
chr17:39928097	chr17:39928097	GSDMA	0.128577	0.897849	0.998469	0.0267994	0.208432	-0.381727	0.435326
chr17:39928097	chr17:39928097	GSDMB	2.31177	0.0220267	0.401731	0.1509	0.0652749	0.0229616	0.278839
chr17:39928097	chr17:39928097	IKZF3	0.47625	0.634527	0.998469	0.0656452	0.137838	-0.204517	0.335807
chr17:39928097	chr17:39928097	MED1	-0.457096	0.648203	0.998469	-0.026138	0.0571827	-0.138216	0.0859401
chr17:39928097	chr17:39928097	MED24	0.128355	0.898024	0.998469	0.0039919	0.0311004	-0.0569648	0.0649486
chr17:39928097	chr17:39928097	MIEN1	-1.14594	0.25348	0.987976	-0.0316962	0.0276596	-0.085909	0.0225166
chr17:39928097	chr17:39928097	MSL1	-0.933653	0.351847	0.998469	-0.0606835	0.0649958	-0.188075	0.0667082
chr17:39928097	chr17:39928097	NEUROD2	-0.740306	0.460166	0.998469	-0.102388	0.138305	-0.373467	0.16869
chr17:39928097	chr17:39928097	NR1D1	-0.247595	0.804755	0.998469	-0.0274591	0.110903	-0.244829	0.189911
chr17:39928097	chr17:39928097	ORMDL3	0.147135	0.883205	0.998469	0.00492488	0.0334719	-0.06068	0.0705298
chr17:39928097	chr17:39928097	PGAP3	1.59361	0.112937	0.885644	0.0688205	0.0431853	-0.0158227	0.153464
chr17:39928097	chr17:39928097	PPP1R1B	0.043399	0.965436	0.998469	0.00892265	0.205596	-0.394045	0.41189
chr17:39928097	chr17:39928097	PSMD3	-1.30871	0.192452	0.972286	-0.0374803	0.0286391	-0.0936128	0.0186523
chr17:39928097	chr17:39928097	RAPGEFL1	-1.47456	0.142236	0.916586	-0.102401	0.0694449	-0.238513	0.0337113
chr17:39928097	chr17:39928097	RARA	-1.11364	0.267055	0.988391	-0.095902	0.0861162	-0.26469	0.0728857
chr17:39928097	chr17:39928097	STARD3	-0.219859	0.826253	0.998469	-0.00824711	0.037511	-0.0817687	0.0652744
chr17:39928097	chr17:39928097	TCAP	0.147585	0.88285	0.998469	0.0177191	0.12006	-0.217598	0.253036
chr17:39928097	chr17:39928097	THRA	-1.13611	0.257559	0.987976	-0.0746619	0.0657172	-0.203468	0.0541439
chr17:39928097	chr17:39928097	TOP2A	-0.202561	0.839728	0.998469	-0.0259726	0.128221	-0.277286	0.225341
chr17:39928097	chr17:39928097	WIPF2	-0.402243	0.688025	0.998469	-0.0155475	0.038652	-0.0913054	0.0602104
chr17:39928545	chr17:39928545	CASC3	-0.313102	0.754598	0.998469	-0.0168122	0.0536954	-0.122055	0.0884308
chr17:39928545	chr17:39928545	CDC6	1.37759	0.170196	0.94622	0.345136	0.250536	-0.145915	0.836188
chr17:39928545	chr17:39928545	CDK12	-0.942675	0.347225	0.998469	-0.0618105	0.0655693	-0.190326	0.0667052
chr17:39928545	chr17:39928545	CSF3	-0.797607	0.426245	0.998469	-0.256608	0.321722	-0.887184	0.373968
chr17:39928545	chr17:39928545	ERBB2	0.225615	0.82178	0.998469	0.0124601	0.0552275	-0.0957858	0.120706
chr17:39928545	chr17:39928545	GJD3	0.324992	0.745599	0.998469	0.0457007	0.140621	-0.229917	0.321318
chr17:39928545	chr17:39928545	GRB7	0.928709	0.354396	0.998469	0.0894114	0.096275	-0.0992875	0.27811
chr17:39928545	chr17:39928545	GSDMA	1.13753	0.256967	0.987976	0.306597	0.269529	-0.221681	0.834874
chr17:39928545	chr17:39928545	GSDMB	0.756947	0.450161	0.998469	0.0650574	0.0859471	-0.103399	0.233514
chr17:39928545	chr17:39928545	IKZF3	-0.119719	0.904851	0.998469	-0.0214353	0.179046	-0.372365	0.329494
chr17:39928545	chr17:39928545	MED1	0.884379	0.377779	0.998469	0.0655341	0.0741019	-0.0797055	0.210774
chr17:39928545	chr17:39928545	MED24	-1.2996	0.195551	0.972286	-0.0522037	0.0401691	-0.130935	0.0265277
chr17:39928545	chr17:39928545	MIEN1	0.480176	0.631738	0.998469	0.0172974	0.036023	-0.0533078	0.0879026
chr17:39928545	chr17:39928545	MSL1	0.317208	0.751487	0.998469	0.0268261	0.0845694	-0.13893	0.192582
chr17:39928545	chr17:39928545	NEUROD2	1.48304	0.139971	0.916586	0.264944	0.178649	-0.0852077	0.615095
chr17:39928545	chr17:39928545	NR1D1	0.397419	0.691572	0.998469	0.057198	0.143924	-0.224893	0.339289
chr17:39928545	chr17:39928545	ORMDL3	-0.201783	0.840335	0.998469	-0.00876711	0.0434482	-0.0939255	0.0763913
chr17:39928545	chr17:39928545	PGAP3	0.671349	0.502937	0.998469	0.0378726	0.0564127	-0.0726962	0.148441
chr17:39928545	chr17:39928545	PPP1R1B	0.00500803	0.99601	0.998469	0.00133659	0.26689	-0.521768	0.524441
chr17:39928545	chr17:39928545	PSMD3	2.53281	0.0122483	0.330975	0.0928618	0.0366636	0.0210012	0.164722
chr17:39928545	chr17:39928545	RAPGEFL1	1.52471	0.129246	0.912854	0.137388	0.0901077	-0.0392231	0.313999
chr17:39928545	chr17:39928545	RARA	1.63493	0.103971	0.84969	0.181985	0.111311	-0.0361841	0.400154
chr17:39928545	chr17:39928545	STARD3	1.33069	0.185128	0.972286	0.0644609	0.0484418	-0.0304851	0.159407
chr17:39928545	chr17:39928545	TCAP	-0.942092	0.347523	0.998469	-0.146444	0.155445	-0.451117	0.158229
chr17:39928545	chr17:39928545	THRA	1.02708	0.305887	0.998469	0.0876814	0.0853697	-0.0796432	0.255006
chr17:39928545	chr17:39928545	TOP2A	0.933604	0.351872	0.998469	0.155006	0.16603	-0.170412	0.480425
chr17:39928545	chr17:39928545	WIPF2	0.0310419	0.975274	0.998469	0.00155829	0.0501996	-0.0968328	0.0999494
chr17:39928952	chr17:39928952	CASC3	-1.04687	0.296691	0.998469	-0.061939	0.0591659	-0.177904	0.0540263
chr17:39928952	chr17:39928952	CDC6	-0.908474	0.364953	0.998469	-0.252363	0.277788	-0.796828	0.292102
chr17:39928952	chr17:39928952	CDK12	0.483988	0.629036	0.998469	0.0351428	0.0726109	-0.107175	0.17746
chr17:39928952	chr17:39928952	CSF3	0.440383	0.660236	0.998469	0.156796	0.356045	-0.541052	0.854645
chr17:39928952	chr17:39928952	ERBB2	1.36427	0.174341	0.951075	0.0828189	0.0607058	-0.0361644	0.201802
chr17:39928952	chr17:39928952	GJD3	1.548	0.123537	0.898459	0.238932	0.154348	-0.0635907	0.541454
chr17:39928952	chr17:39928952	GRB7	1.19203	0.234962	0.987976	0.126623	0.106225	-0.0815777	0.334824
chr17:39928952	chr17:39928952	GSDMA	0.853247	0.394759	0.998469	0.254603	0.298393	-0.330248	0.839455
chr17:39928952	chr17:39928952	GSDMB	0.530974	0.59615	0.998469	0.0504813	0.0950729	-0.135862	0.236824
chr17:39928952	chr17:39928952	IKZF3	-0.383317	0.701978	0.998469	-0.0758213	0.197803	-0.463515	0.311873
chr17:39928952	chr17:39928952	MED1	1.03411	0.3026	0.998469	0.0846177	0.081827	-0.0757632	0.244999
chr17:39928952	chr17:39928952	MED24	0.796632	0.426809	0.998469	0.035479	0.0445362	-0.051812	0.12277
chr17:39928952	chr17:39928952	MIEN1	1.69926	0.0911552	0.810142	0.0671149	0.0394966	-0.0102984	0.144528
chr17:39928952	chr17:39928952	MSL1	2.42995	0.0161731	0.352013	0.223229	0.0918658	0.0431722	0.403286
chr17:39928952	chr17:39928952	NEUROD2	0.993013	0.322157	0.998469	0.196779	0.198164	-0.191622	0.585181
chr17:39928952	chr17:39928952	NR1D1	0.762486	0.446859	0.998469	0.12113	0.158862	-0.190239	0.432499
chr17:39928952	chr17:39928952	ORMDL3	0.0554317	0.955862	0.998469	0.00266209	0.0480247	-0.0914663	0.0967905
chr17:39928952	chr17:39928952	PGAP3	0.0127279	0.98986	0.998469	0.00079464	0.0624327	-0.121573	0.123163
chr17:39928952	chr17:39928952	PPP1R1B	-1.29217	0.198104	0.974132	-0.379237	0.293487	-0.954472	0.195999
chr17:39928952	chr17:39928952	PSMD3	1.18708	0.236904	0.987976	0.0488194	0.0411258	-0.0317871	0.129426
chr17:39928952	chr17:39928952	RAPGEFL1	0.932841	0.352265	0.998469	0.0933057	0.100023	-0.10274	0.289351
chr17:39928952	chr17:39928952	RARA	1.55891	0.120934	0.898459	0.191918	0.123111	-0.0493785	0.433215
chr17:39928952	chr17:39928952	STARD3	0.762509	0.446845	0.998469	0.0409697	0.0537302	-0.0643414	0.146281
chr17:39928952	chr17:39928952	TCAP	0.269519	0.787867	0.998469	0.0464173	0.172223	-0.291139	0.383974
chr17:39928952	chr17:39928952	THRA	-0.364878	0.71567	0.998469	-0.0345226	0.0946141	-0.219966	0.150921
chr17:39928952	chr17:39928952	TOP2A	-1.19168	0.235096	0.987976	-0.21831	0.183195	-0.577372	0.140751
chr17:39928952	chr17:39928952	WIPF2	0.687011	0.49304	0.998469	0.0380617	0.0554018	-0.0705259	0.146649
chr17:39929132	chr17:39929132	CASC3	-1.61089	0.109114	0.868435	-0.0611386	0.0379532	-0.135527	0.0132497
chr17:39929132	chr17:39929132	CDC6	-0.499087	0.618383	0.998469	-0.0894898	0.179307	-0.440932	0.261952
chr17:39929132	chr17:39929132	CDK12	1.02995	0.304542	0.998469	0.0480686	0.0466709	-0.0434064	0.139544
chr17:39929132	chr17:39929132	CSF3	1.30439	0.193917	0.972286	0.297898	0.228381	-0.149729	0.745525
chr17:39929132	chr17:39929132	ERBB2	-1.46123	0.145855	0.922393	-0.0571109	0.0390842	-0.133716	0.0194941
chr17:39929132	chr17:39929132	GJD3	0.592206	0.554523	0.998469	0.0592614	0.100069	-0.136874	0.255397
chr17:39929132	chr17:39929132	GRB7	-1.03142	0.303853	0.998469	-0.0706736	0.0685206	-0.204974	0.0636268
chr17:39929132	chr17:39929132	GSDMA	-2.522	0.0126165	0.330975	-0.476874	0.189086	-0.847483	-0.106266
chr17:39929132	chr17:39929132	GSDMB	1.06216	0.289713	0.995101	0.0649034	0.0611048	-0.0548621	0.184669
chr17:39929132	chr17:39929132	IKZF3	-0.705406	0.481552	0.998469	-0.089813	0.127321	-0.339362	0.159736
chr17:39929132	chr17:39929132	MED1	-1.86461	0.0640126	0.717102	-0.0976082	0.0523479	-0.20021	0.00499359
chr17:39929132	chr17:39929132	MED24	0.138869	0.889723	0.998469	0.00399259	0.0287507	-0.0523589	0.060344
chr17:39929132	chr17:39929132	MIEN1	-0.123041	0.902224	0.998469	-0.00315854	0.0256705	-0.0534728	0.0471557
chr17:39929132	chr17:39929132	MSL1	-0.317326	0.751397	0.998469	-0.0191113	0.060226	-0.137154	0.0989317
chr17:39929132	chr17:39929132	NEUROD2	-0.0917346	0.92702	0.998469	-0.0117481	0.128066	-0.262758	0.239262
chr17:39929132	chr17:39929132	NR1D1	-1.09193	0.276454	0.991261	-0.111569	0.102176	-0.311834	0.0886953
chr17:39929132	chr17:39929132	ORMDL3	-0.429374	0.668211	0.998469	-0.0132797	0.0309281	-0.0738989	0.0473394
chr17:39929132	chr17:39929132	PGAP3	-0.145083	0.884823	0.998469	-0.00583617	0.0402265	-0.0846801	0.0730078
chr17:39929132	chr17:39929132	PPP1R1B	-0.116571	0.907342	0.998469	-0.0221553	0.190058	-0.394669	0.350358
chr17:39929132	chr17:39929132	PSMD3	-1.05511	0.292919	0.998469	-0.0279849	0.0265234	-0.0799707	0.0240008
chr17:39929132	chr17:39929132	RAPGEFL1	-1.25164	0.212471	0.987976	-0.0805007	0.064316	-0.20656	0.0455586
chr17:39929132	chr17:39929132	RARA	-1.60133	0.111217	0.878616	-0.126978	0.0792957	-0.282398	0.0284412
chr17:39929132	chr17:39929132	STARD3	-1.15289	0.250621	0.987976	-0.0398251	0.0345436	-0.107531	0.0278803
chr17:39929132	chr17:39929132	TCAP	-1.33011	0.185318	0.972286	-0.146854	0.110407	-0.363252	0.0695446
chr17:39929132	chr17:39929132	THRA	-1.90411	0.0586366	0.717102	-0.114876	0.0603307	-0.233124	0.00337203
chr17:39929132	chr17:39929132	TOP2A	-0.666208	0.506208	0.998469	-0.078873	0.118391	-0.310919	0.153173
chr17:39929132	chr17:39929132	WIPF2	-0.254484	0.799438	0.998469	-0.00909595	0.0357427	-0.0791516	0.0609597
chr17:39929320	chr17:39929320	CASC3	-1.04687	0.296691	0.998469	-0.061939	0.0591659	-0.177904	0.0540263
chr17:39929320	chr17:39929320	CDC6	-0.908474	0.364953	0.998469	-0.252363	0.277788	-0.796828	0.292102
chr17:39929320	chr17:39929320	CDK12	0.483988	0.629036	0.998469	0.0351428	0.0726109	-0.107175	0.17746
chr17:39929320	chr17:39929320	CSF3	0.440383	0.660236	0.998469	0.156796	0.356045	-0.541052	0.854645
chr17:39929320	chr17:39929320	ERBB2	1.36427	0.174341	0.951075	0.0828189	0.0607058	-0.0361644	0.201802
chr17:39929320	chr17:39929320	GJD3	1.548	0.123537	0.898459	0.238932	0.154348	-0.0635907	0.541454
chr17:39929320	chr17:39929320	GRB7	1.19203	0.234962	0.987976	0.126623	0.106225	-0.0815777	0.334824
chr17:39929320	chr17:39929320	GSDMA	0.853247	0.394759	0.998469	0.254603	0.298393	-0.330248	0.839455
chr17:39929320	chr17:39929320	GSDMB	0.530974	0.59615	0.998469	0.0504813	0.0950729	-0.135862	0.236824
chr17:39929320	chr17:39929320	IKZF3	-0.383317	0.701978	0.998469	-0.0758213	0.197803	-0.463515	0.311873
chr17:39929320	chr17:39929320	MED1	1.03411	0.3026	0.998469	0.0846177	0.081827	-0.0757632	0.244999
chr17:39929320	chr17:39929320	MED24	0.796632	0.426809	0.998469	0.035479	0.0445362	-0.051812	0.12277
chr17:39929320	chr17:39929320	MIEN1	1.69926	0.0911552	0.810142	0.0671149	0.0394966	-0.0102984	0.144528
chr17:39929320	chr17:39929320	MSL1	2.42995	0.0161731	0.352013	0.223229	0.0918658	0.0431722	0.403286
chr17:39929320	chr17:39929320	NEUROD2	0.993013	0.322157	0.998469	0.196779	0.198164	-0.191622	0.585181
chr17:39929320	chr17:39929320	NR1D1	0.762486	0.446859	0.998469	0.12113	0.158862	-0.190239	0.432499
chr17:39929320	chr17:39929320	ORMDL3	0.0554317	0.955862	0.998469	0.00266209	0.0480247	-0.0914663	0.0967905
chr17:39929320	chr17:39929320	PGAP3	0.0127279	0.98986	0.998469	0.00079464	0.0624327	-0.121573	0.123163
chr17:39929320	chr17:39929320	PPP1R1B	-1.29217	0.198104	0.974132	-0.379237	0.293487	-0.954472	0.195999
chr17:39929320	chr17:39929320	PSMD3	1.18708	0.236904	0.987976	0.0488194	0.0411258	-0.0317871	0.129426
chr17:39929320	chr17:39929320	RAPGEFL1	0.932841	0.352265	0.998469	0.0933057	0.100023	-0.10274	0.289351
chr17:39929320	chr17:39929320	RARA	1.55891	0.120934	0.898459	0.191918	0.123111	-0.0493785	0.433215
chr17:39929320	chr17:39929320	STARD3	0.762509	0.446845	0.998469	0.0409697	0.0537302	-0.0643414	0.146281
chr17:39929320	chr17:39929320	TCAP	0.269519	0.787867	0.998469	0.0464173	0.172223	-0.291139	0.383974
chr17:39929320	chr17:39929320	THRA	-0.364878	0.71567	0.998469	-0.0345226	0.0946141	-0.219966	0.150921
chr17:39929320	chr17:39929320	TOP2A	-1.19168	0.235096	0.987976	-0.21831	0.183195	-0.577372	0.140751
chr17:39929320	chr17:39929320	WIPF2	0.687011	0.49304	0.998469	0.0380617	0.0554018	-0.0705259	0.146649
rs4795403	chr17:39929469	CASC3	-0.338068	0.735742	0.998469	-0.0248286	0.0734426	-0.168776	0.119119
rs4795403	chr17:39929469	CDC6	1.41289	0.159571	0.945459	0.484043	0.34259	-0.187434	1.15552
rs4795403	chr17:39929469	CDK12	-0.407414	0.684232	0.998469	-0.0366198	0.0898836	-0.212792	0.139552
rs4795403	chr17:39929469	CSF3	1.92106	0.0564483	0.717102	0.837697	0.43606	-0.0169804	1.69237
rs4795403	chr17:39929469	ERBB2	0.665375	0.50674	0.998469	0.0502041	0.0754523	-0.0976825	0.198091
rs4795403	chr17:39929469	GJD3	0.780069	0.436468	0.998469	0.149815	0.192053	-0.22661	0.52624
rs4795403	chr17:39929469	GRB7	-0.0586883	0.953271	0.998469	-0.00774863	0.13203	-0.266528	0.25103
rs4795403	chr17:39929469	GSDMA	1.86623	0.0637843	0.717102	0.683538	0.366267	-0.0343459	1.40142
rs4795403	chr17:39929469	GSDMB	5.94617	1.58993e-08	3.76815e-06	0.635467	0.10687	0.426002	0.844933
rs4795403	chr17:39929469	IKZF3	1.2155	0.225913	0.987976	0.29637	0.243826	-0.181529	0.774268
rs4795403	chr17:39929469	MED1	0.598142	0.550565	0.998469	0.0607047	0.101489	-0.138213	0.259623
rs4795403	chr17:39929469	MED24	-0.637825	0.524472	0.998469	-0.0351805	0.055157	-0.143288	0.0729272
rs4795403	chr17:39929469	MIEN1	-0.0646905	0.948499	0.998469	-0.00318971	0.0493072	-0.0998318	0.0934524
rs4795403	chr17:39929469	MSL1	0.419425	0.675451	0.998469	0.0485066	0.11565	-0.178168	0.275181
rs4795403	chr17:39929469	NEUROD2	0.382313	0.702721	0.998469	0.0940015	0.245875	-0.387914	0.575917
rs4795403	chr17:39929469	NR1D1	0.0130839	0.989577	0.998469	0.00257697	0.196957	-0.38346	0.388614
rs4795403	chr17:39929469	ORMDL3	0.432989	0.665588	0.998469	0.025721	0.0594033	-0.0907095	0.142152
rs4795403	chr17:39929469	PGAP3	3.26733	0.00132083	0.0687153	0.24467	0.0748837	0.097898	0.391442
rs4795403	chr17:39929469	PPP1R1B	-0.682091	0.496138	0.998469	-0.248654	0.364547	-0.963166	0.465858
rs4795403	chr17:39929469	PSMD3	0.327435	0.743754	0.998469	0.0167315	0.0510986	-0.0834217	0.116885
rs4795403	chr17:39929469	RAPGEFL1	0.467913	0.640465	0.998469	0.0580375	0.124035	-0.185071	0.301146
rs4795403	chr17:39929469	RARA	0.953715	0.341623	0.998469	0.145977	0.153061	-0.154023	0.445977
rs4795403	chr17:39929469	STARD3	0.270442	0.787158	0.998469	0.0180115	0.0666001	-0.112525	0.148548
rs4795403	chr17:39929469	TCAP	-0.0896665	0.928661	0.998469	-0.0191159	0.213189	-0.436966	0.398734
rs4795403	chr17:39929469	THRA	-1.68453	0.09397	0.822241	-0.195657	0.116149	-0.42331	0.0319957
rs4795403	chr17:39929469	TOP2A	1.02149	0.308517	0.998469	0.231861	0.226983	-0.213026	0.676748
rs4795403	chr17:39929469	WIPF2	-0.125148	0.900559	0.998469	-0.00859282	0.0686614	-0.143169	0.125984
rs73985230	chr17:39929476	CASC3	1.43293	0.153769	0.9398	0.0754713	0.0526692	-0.0277603	0.178703
rs73985230	chr17:39929476	CDC6	1.13623	0.257506	0.987976	0.281388	0.24765	-0.204005	0.766781
rs73985230	chr17:39929476	CDK12	-1.62394	0.106297	0.858834	-0.104513	0.0643576	-0.230654	0.021628
rs73985230	chr17:39929476	CSF3	0.103616	0.9176	0.998469	0.0329537	0.318038	-0.590401	0.656308
rs73985230	chr17:39929476	ERBB2	0.595871	0.552078	0.998469	0.0324402	0.0544417	-0.0742655	0.139146
rs73985230	chr17:39929476	GJD3	-1.33344	0.184225	0.972286	-0.184082	0.13805	-0.454661	0.0864969
rs73985230	chr17:39929476	GRB7	-0.723338	0.470497	0.998469	-0.068782	0.0950898	-0.255158	0.117594
rs73985230	chr17:39929476	GSDMA	3.05859	0.00259559	0.110728	0.794371	0.259718	0.285323	1.30342
rs73985230	chr17:39929476	GSDMB	-0.116842	0.907128	0.998469	-0.00992523	0.0849459	-0.176419	0.156569
rs73985230	chr17:39929476	IKZF3	0.643481	0.520806	0.998469	0.11354	0.176447	-0.232296	0.459377
rs73985230	chr17:39929476	MED1	0.670427	0.503523	0.998469	0.0490673	0.0731882	-0.0943816	0.192516
rs73985230	chr17:39929476	MED24	-0.380001	0.704433	0.998469	-0.0151312	0.0398189	-0.0931763	0.0629139
rs73985230	chr17:39929476	MIEN1	0.119024	0.905401	0.998469	0.00423328	0.0355665	-0.0654771	0.0739436
rs73985230	chr17:39929476	MSL1	-0.736385	0.462542	0.998469	-0.0613641	0.0833315	-0.224694	0.101966
rs73985230	chr17:39929476	NEUROD2	-0.404354	0.686476	0.998469	-0.0717129	0.177352	-0.419323	0.275897
rs73985230	chr17:39929476	NR1D1	1.09468	0.275252	0.991261	0.154965	0.141561	-0.122496	0.432425
rs73985230	chr17:39929476	ORMDL3	-0.377745	0.706105	0.998469	-0.0161887	0.0428562	-0.100187	0.0678094
rs73985230	chr17:39929476	PGAP3	1.54063	0.125322	0.898459	0.0852594	0.0553406	-0.0232081	0.193727
rs73985230	chr17:39929476	PPP1R1B	-0.519963	0.603786	0.998469	-0.136812	0.26312	-0.652527	0.378902
rs73985230	chr17:39929476	PSMD3	-0.88133	0.379421	0.998469	-0.03242	0.0367853	-0.104519	0.0396791
rs73985230	chr17:39929476	RAPGEFL1	0.0774773	0.938338	0.998469	0.00693653	0.0895299	-0.168542	0.182415
rs73985230	chr17:39929476	RARA	0.898014	0.370487	0.998469	0.0991807	0.110445	-0.117291	0.315652
rs73985230	chr17:39929476	STARD3	0.334432	0.738478	0.998469	0.0160648	0.0480361	-0.0780859	0.110216
rs73985230	chr17:39929476	TCAP	0.502287	0.616135	0.998469	0.0771861	0.153669	-0.224006	0.378378
rs73985230	chr17:39929476	THRA	1.50156	0.135123	0.916586	0.126025	0.0839298	-0.0384771	0.290528
rs73985230	chr17:39929476	TOP2A	0.0950055	0.924426	0.998469	0.0156043	0.164246	-0.306318	0.337526
rs73985230	chr17:39929476	WIPF2	-0.14571	0.884328	0.998469	-0.00721672	0.0495278	-0.104291	0.0898578
chr17:39929538	chr17:39929538	CASC3	0.426934	0.669984	0.998469	0.0176551	0.0413533	-0.0633973	0.0987075
chr17:39929538	chr17:39929538	CDC6	0.591446	0.555031	0.998469	0.114681	0.1939	-0.265363	0.494725
chr17:39929538	chr17:39929538	CDK12	0.14885	0.881854	0.998469	0.00753823	0.0506432	-0.0917225	0.106799
chr17:39929538	chr17:39929538	CSF3	1.39116	0.16605	0.94622	0.343435	0.24687	-0.14043	0.827301
chr17:39929538	chr17:39929538	ERBB2	-0.0498549	0.960298	0.998469	-0.00212134	0.0425503	-0.0855199	0.0812773
chr17:39929538	chr17:39929538	GJD3	-0.789424	0.430997	0.998469	-0.0853817	0.108157	-0.297369	0.126606
chr17:39929538	chr17:39929538	GRB7	-0.938847	0.349182	0.998469	-0.0696253	0.0741604	-0.21498	0.0757292
chr17:39929538	chr17:39929538	GSDMA	0.128577	0.897849	0.998469	0.0267994	0.208432	-0.381727	0.435326
chr17:39929538	chr17:39929538	GSDMB	2.31177	0.0220267	0.401731	0.1509	0.0652749	0.0229616	0.278839
chr17:39929538	chr17:39929538	IKZF3	0.47625	0.634527	0.998469	0.0656452	0.137838	-0.204517	0.335807
chr17:39929538	chr17:39929538	MED1	-0.457096	0.648203	0.998469	-0.026138	0.0571827	-0.138216	0.0859401
chr17:39929538	chr17:39929538	MED24	0.128355	0.898024	0.998469	0.0039919	0.0311004	-0.0569648	0.0649486
chr17:39929538	chr17:39929538	MIEN1	-1.14594	0.25348	0.987976	-0.0316962	0.0276596	-0.085909	0.0225166
chr17:39929538	chr17:39929538	MSL1	-0.933653	0.351847	0.998469	-0.0606835	0.0649958	-0.188075	0.0667082
chr17:39929538	chr17:39929538	NEUROD2	-0.740306	0.460166	0.998469	-0.102388	0.138305	-0.373467	0.16869
chr17:39929538	chr17:39929538	NR1D1	-0.247595	0.804755	0.998469	-0.0274591	0.110903	-0.244829	0.189911
chr17:39929538	chr17:39929538	ORMDL3	0.147135	0.883205	0.998469	0.00492488	0.0334719	-0.06068	0.0705298
chr17:39929538	chr17:39929538	PGAP3	1.59361	0.112937	0.885644	0.0688205	0.0431853	-0.0158227	0.153464
chr17:39929538	chr17:39929538	PPP1R1B	0.043399	0.965436	0.998469	0.00892265	0.205596	-0.394045	0.41189
chr17:39929538	chr17:39929538	PSMD3	-1.30871	0.192452	0.972286	-0.0374803	0.0286391	-0.0936128	0.0186523
chr17:39929538	chr17:39929538	RAPGEFL1	-1.47456	0.142236	0.916586	-0.102401	0.0694449	-0.238513	0.0337113
chr17:39929538	chr17:39929538	RARA	-1.11364	0.267055	0.988391	-0.095902	0.0861162	-0.26469	0.0728857
chr17:39929538	chr17:39929538	STARD3	-0.219859	0.826253	0.998469	-0.00824711	0.037511	-0.0817687	0.0652744
chr17:39929538	chr17:39929538	TCAP	0.147585	0.88285	0.998469	0.0177191	0.12006	-0.217598	0.253036
chr17:39929538	chr17:39929538	THRA	-1.13611	0.257559	0.987976	-0.0746619	0.0657172	-0.203468	0.0541439
chr17:39929538	chr17:39929538	TOP2A	-0.202561	0.839728	0.998469	-0.0259726	0.128221	-0.277286	0.225341
chr17:39929538	chr17:39929538	WIPF2	-0.402243	0.688025	0.998469	-0.0155475	0.038652	-0.0913054	0.0602104
chr17:39930076	chr17:39930076	CASC3	0.696695	0.486974	0.998469	0.0508606	0.0730028	-0.0922248	0.193946
[truncated: 134 more rows]
